# Supplementary material for: Obesity-induced senescent macrophages activate a fibrotic transcriptional program in adipocyte progenitors
Source: Life Sci Alliance. 2022 Feb 18;5(5):e202101286. doi: 10.26508/lsa.202101286 (PMC8860101; doi:10.26508/lsa.202101286)
Supplement: Supplementary file 1 [file LSA-2021-01286_TableS1.xlsx]

## Sheet: Sheet1
	cluster	gene	avg_logFC	pct.1	pct.2	p_val	p_val_adj	description
1	0	Gpx3	2.02601	0.911	0.079	4.73e-280	7.26e-276	glutathione peroxidase 3 [Source:MGI Symbol;Acc:MGI:105102]
2	0	Dpep1	1.96629	0.962	0.108	9.06e-277	1.39e-272	dipeptidase 1 [Source:MGI Symbol;Acc:MGI:94917]
3	0	Abca8a	1.61	0.848	0.057	1.81e-266	2.78e-262	ATP-binding cassette, sub-family A (ABC1), member 8a [Source:MGI Symbol;Acc:MGI:2386846]
4	0	Svep1	1.56421	0.872	0.071	3.23e-265	4.97e-261	sushi, von Willebrand factor type A, EGF and pentraxin domain containing 1 [Source:MGI Symbol;Acc:MGI:1928849]
5	0	Serpinf1	1.93987	0.982	0.176	1.24e-259	1.91e-255	serine (or cysteine) peptidase inhibitor, clade F, member 1 [Source:MGI Symbol;Acc:MGI:108080]
6	0	Entpd2	1.36749	0.924	0.1	2.31e-259	3.55e-255	ectonucleoside triphosphate diphosphohydrolase 2 [Source:MGI Symbol;Acc:MGI:1096863]
7	0	Lum	1.98337	0.944	0.109	3.46e-257	5.31e-253	lumican [Source:MGI Symbol;Acc:MGI:109347]
8	0	Cpxm1	1.65943	0.834	0.063	7.62e-255	1.17e-250	carboxypeptidase X 1 (M14 family) [Source:MGI Symbol;Acc:MGI:1934569]
9	0	Smoc2	1.70857	0.843	0.065	1.16e-252	1.78e-248	SPARC related modular calcium binding 2 [Source:MGI Symbol;Acc:MGI:1929881]
10	0	Dcn	2.34127	1	0.237	6.61e-251	1.02e-246	decorin [Source:MGI Symbol;Acc:MGI:94872]
11	0	Scn7a	1.30438	0.861	0.075	1.19e-249	1.82e-245	sodium channel, voltage-gated, type VII, alpha [Source:MGI Symbol;Acc:MGI:102965]
12	0	Col1a2	2.0939	0.998	0.188	5.31e-246	8.16e-242	collagen, type I, alpha 2 [Source:MGI Symbol;Acc:MGI:88468]
13	0	Pdgfra	1.31358	0.895	0.091	9.6e-244	1.48e-239	platelet derived growth factor receptor, alpha polypeptide [Source:MGI Symbol;Acc:MGI:97530]
14	0	Mmp2	1.39752	0.819	0.067	6.61e-243	1.02e-238	matrix metallopeptidase 2 [Source:MGI Symbol;Acc:MGI:97009]
15	0	Inmt	2.00792	0.723	0.026	3.63e-241	5.57e-237	indolethylamine N-methyltransferase [Source:MGI Symbol;Acc:MGI:102963]
16	0	Col1a1	1.90352	0.98	0.162	9.05e-241	1.39e-236	collagen, type I, alpha 1 [Source:MGI Symbol;Acc:MGI:88467]
17	0	Serping1	1.82333	0.998	0.183	1.28e-237	1.97e-233	serine (or cysteine) peptidase inhibitor, clade G, member 1 [Source:MGI Symbol;Acc:MGI:894696]
18	0	Aebp1	1.65725	0.973	0.146	3.3e-235	5.07e-231	AE binding protein 1 [Source:MGI Symbol;Acc:MGI:1197012]
19	0	Rbp1	1.2248	0.857	0.08	3.82e-233	5.87e-229	retinol binding protein 1, cellular [Source:MGI Symbol;Acc:MGI:97876]
20	0	Col3a1	2.31528	0.998	0.23	2.27e-232	3.48e-228	collagen, type III, alpha 1 [Source:MGI Symbol;Acc:MGI:88453]
21	0	Col6a1	1.78174	0.975	0.195	1.08e-230	1.66e-226	collagen, type VI, alpha 1 [Source:MGI Symbol;Acc:MGI:88459]
22	0	Col6a2	1.6115	0.942	0.16	3.41e-230	5.24e-226	collagen, type VI, alpha 2 [Source:MGI Symbol;Acc:MGI:88460]
23	0	Col15a1	1.30722	0.758	0.051	4.07e-230	6.26e-226	collagen, type XV, alpha 1 [Source:MGI Symbol;Acc:MGI:88449]
24	0	Htra3	1.37435	0.924	0.115	7.53e-229	1.16e-224	HtrA serine peptidase 3 [Source:MGI Symbol;Acc:MGI:1925808]
25	0	Ogn	1.59261	0.969	0.139	3.33e-228	5.12e-224	osteoglycin [Source:MGI Symbol;Acc:MGI:109278]
26	0	Abi3bp	1.3736	0.902	0.119	1.03e-227	1.58e-223	ABI gene family, member 3 (NESH) binding protein [Source:MGI Symbol;Acc:MGI:2444583]
27	0	Col5a2	1.47376	0.933	0.15	2.8e-226	4.3e-222	collagen, type V, alpha 2 [Source:MGI Symbol;Acc:MGI:88458]
28	0	Fbln2	1.57641	0.946	0.167	1.46e-225	2.24e-221	fibulin 2 [Source:MGI Symbol;Acc:MGI:95488]
29	0	Lama2	1.33553	0.899	0.129	3.35e-225	5.15e-221	laminin, alpha 2 [Source:MGI Symbol;Acc:MGI:99912]
30	0	Tnxb	1.46665	0.98	0.152	2.29e-224	3.52e-220	tenascin XB [Source:MGI Symbol;Acc:MGI:1932137]
31	0	Bicc1	1.2723	0.911	0.127	2.25e-222	3.45e-218	BicC family RNA binding protein 1 [Source:MGI Symbol;Acc:MGI:1933388]
32	0	Cp	1.59348	0.895	0.154	2.84e-220	4.36e-216	ceruloplasmin [Source:MGI Symbol;Acc:MGI:88476]
33	0	Col6a3	1.54872	0.917	0.15	3.35e-220	5.15e-216	collagen, type VI, alpha 3 [Source:MGI Symbol;Acc:MGI:88461]
34	0	Penk	1.65236	0.792	0.075	4.94e-220	7.59e-216	preproenkephalin [Source:MGI Symbol;Acc:MGI:104629]
35	0	Cyp1b1	1.10218	0.747	0.056	3.67e-217	5.65e-213	cytochrome P450, family 1, subfamily b, polypeptide 1 [Source:MGI Symbol;Acc:MGI:88590]
36	0	Clec3b	1.62512	0.991	0.159	1.61e-216	2.48e-212	C-type lectin domain family 3, member b [Source:MGI Symbol;Acc:MGI:104540]
37	0	Adamts2	1.24022	0.875	0.115	2.67e-213	4.1e-209	a disintegrin-like and metallopeptidase (reprolysin type) with thrombospondin type 1 motif, 2 [Source:MGI Symbol;Acc:MGI:1347356]
38	0	Crispld2	0.995686	0.678	0.031	3.86e-213	5.93e-209	cysteine-rich secretory protein LCCL domain containing 2 [Source:MGI Symbol;Acc:MGI:1926142]
39	0	Ifi205	1.29471	0.799	0.089	7.01e-213	1.08e-208	interferon activated gene 205 [Source:MGI Symbol;Acc:MGI:101847]
40	0	Slit3	1.21907	0.87	0.129	9.74e-213	1.5e-208	slit guidance ligand 3 [Source:MGI Symbol;Acc:MGI:1315202]
41	0	C3	1.74531	0.996	0.195	5.19e-212	7.97e-208	complement component 3 [Source:MGI Symbol;Acc:MGI:88227]
42	0	Gsn	2.43003	1	0.531	7.63e-211	1.17e-206	gelsolin [Source:MGI Symbol;Acc:MGI:95851]
43	0	Dpt	1.34055	0.987	0.142	3.14e-210	4.83e-206	dermatopontin [Source:MGI Symbol;Acc:MGI:1928392]
44	0	Cygb	1.40963	0.926	0.155	1.95e-209	3e-205	cytoglobin [Source:MGI Symbol;Acc:MGI:2149481]
45	0	C1s1	1.33762	0.964	0.174	2.39e-207	3.67e-203	complement component 1, s subcomponent 1 [Source:MGI Symbol;Acc:MGI:1355312]
46	0	Serpine2	1.25499	0.796	0.094	7.64e-207	1.17e-202	serine (or cysteine) peptidase inhibitor, clade E, member 2 [Source:MGI Symbol;Acc:MGI:101780]
47	0	Col5a1	1.20253	0.866	0.125	4.62e-206	7.09e-202	collagen, type V, alpha 1 [Source:MGI Symbol;Acc:MGI:88457]
48	0	Ms4a4d	1.07733	0.767	0.079	2.7e-205	4.14e-201	membrane-spanning 4-domains, subfamily A, member 4D [Source:MGI Symbol;Acc:MGI:1913857]
49	0	Egfr	1.24993	0.884	0.158	7.49e-204	1.15e-199	epidermal growth factor receptor [Source:MGI Symbol;Acc:MGI:95294]
50	0	Srpx	1.04617	0.647	0.03	5.03e-203	7.73e-199	sushi-repeat-containing protein [Source:MGI Symbol;Acc:MGI:1858306]
51	0	Mmp23	1.08771	0.861	0.113	7.77e-203	1.19e-198	matrix metallopeptidase 23 [Source:MGI Symbol;Acc:MGI:1347361]
52	0	Steap4	1.2004	0.817	0.092	2.57e-202	3.95e-198	STEAP family member 4 [Source:MGI Symbol;Acc:MGI:1923560]
53	0	Sult1e1	2.23319	0.749	0.077	9.13e-202	1.4e-197	sulfotransferase family 1E, member 1 [Source:MGI Symbol;Acc:MGI:98431]
54	0	Hsd11b1	1.66789	0.758	0.08	5.84e-201	8.97e-197	hydroxysteroid 11-beta dehydrogenase 1 [Source:MGI Symbol;Acc:MGI:103562]
55	0	Ccdc80	1.29539	0.944	0.169	6.74e-200	1.04e-195	coiled-coil domain containing 80 [Source:MGI Symbol;Acc:MGI:1915146]
56	0	Bgn	1.67601	0.942	0.204	1.56e-197	2.39e-193	biglycan [Source:MGI Symbol;Acc:MGI:88158]
57	0	Ctsk	1.23876	0.776	0.093	2.65e-196	4.07e-192	cathepsin K [Source:MGI Symbol;Acc:MGI:107823]
58	0	Col5a3	1.41608	0.819	0.118	8.95e-196	1.37e-191	collagen, type V, alpha 3 [Source:MGI Symbol;Acc:MGI:1858212]
59	0	Gpm6b	1.18751	0.758	0.084	1.91e-195	2.94e-191	glycoprotein m6b [Source:MGI Symbol;Acc:MGI:107672]
60	0	Lox	1.06781	0.642	0.036	3.21e-192	4.94e-188	lysyl oxidase [Source:MGI Symbol;Acc:MGI:96817]
61	0	Adamts5	1.33394	0.949	0.168	4.52e-191	6.95e-187	a disintegrin-like and metallopeptidase (reprolysin type) with thrombospondin type 1 motif, 5 (aggrecanase-2) [Source:MGI Symbol;Acc:MGI:1346321]
62	0	Gdf10	1.15821	0.633	0.036	3.44e-189	5.29e-185	growth differentiation factor 10 [Source:MGI Symbol;Acc:MGI:95684]
63	0	C1ra	1.0086	0.879	0.142	4.8e-189	7.38e-185	complement component 1, r subcomponent A [Source:MGI Symbol;Acc:MGI:1355313]
64	0	Ccl11	1.88138	0.877	0.17	6.29e-189	9.67e-185	chemokine (C-C motif) ligand 11 [Source:MGI Symbol;Acc:MGI:103576]
65	0	Arhgap24	0.82141	0.626	0.036	1.31e-187	2.02e-183	Rho GTPase activating protein 24 [Source:MGI Symbol;Acc:MGI:1922647]
66	0	Mfap5	1.10606	0.96	0.144	6.62e-186	1.02e-181	microfibrillar associated protein 5 [Source:MGI Symbol;Acc:MGI:1354387]
67	0	Gas1	1.21462	0.823	0.117	1.74e-185	2.67e-181	growth arrest specific 1 [Source:MGI Symbol;Acc:MGI:95655]
68	0	Prelp	1.01532	0.839	0.131	8.76e-185	1.35e-180	proline arginine-rich end leucine-rich repeat [Source:MGI Symbol;Acc:MGI:2151110]
69	0	Serpinh1	1.413	0.982	0.294	1.09e-184	1.67e-180	serine (or cysteine) peptidase inhibitor, clade H, member 1 [Source:MGI Symbol;Acc:MGI:88283]
70	0	Tnfaip6	1.57008	0.783	0.1	1.32e-181	2.02e-177	tumor necrosis factor alpha induced protein 6 [Source:MGI Symbol;Acc:MGI:1195266]
71	0	Slc43a3	1.23557	0.924	0.218	1.86e-181	2.85e-177	solute carrier family 43, member 3 [Source:MGI Symbol;Acc:MGI:1931054]
72	0	Fstl1	1.15733	0.987	0.202	3.59e-181	5.52e-177	follistatin-like 1 [Source:MGI Symbol;Acc:MGI:102793]
73	0	Rarres2	1.08249	0.978	0.239	8.46e-181	1.3e-176	retinoic acid receptor responder (tazarotene induced) 2 [Source:MGI Symbol;Acc:MGI:1918910]
74	0	Col6a6	0.906421	0.602	0.032	9.01e-181	1.38e-176	collagen, type VI, alpha 6 [Source:MGI Symbol;Acc:MGI:2444259]
75	0	Col6a5	1.672	0.669	0.063	8.96e-178	1.38e-173	collagen, type VI, alpha 5 [Source:MGI Symbol;Acc:MGI:3648134]
76	0	Mmp14	1.03402	0.794	0.119	7.56e-177	1.16e-172	matrix metallopeptidase 14 (membrane-inserted) [Source:MGI Symbol;Acc:MGI:101900]
77	0	Loxl1	1.05738	0.837	0.116	9.1e-177	1.4e-172	lysyl oxidase-like 1 [Source:MGI Symbol;Acc:MGI:106096]
78	0	Igfbp6	0.952097	0.969	0.157	1.28e-175	1.97e-171	insulin-like growth factor binding protein 6 [Source:MGI Symbol;Acc:MGI:96441]
79	0	Lamc1	1.18165	0.913	0.209	1.16e-174	1.79e-170	laminin, gamma 1 [Source:MGI Symbol;Acc:MGI:99914]
80	0	Mxra8	0.945562	0.83	0.141	8.89e-174	1.37e-169	matrix-remodelling associated 8 [Source:MGI Symbol;Acc:MGI:1922011]
81	0	Itih5	1.20815	0.915	0.183	1.56e-172	2.4e-168	inter-alpha (globulin) inhibitor H5 [Source:MGI Symbol;Acc:MGI:1925751]
82	0	Sdc2	0.981173	0.821	0.125	8.29e-172	1.27e-167	syndecan 2 [Source:MGI Symbol;Acc:MGI:1349165]
83	0	Lrp1	1.19293	0.989	0.447	9.27e-172	1.42e-167	low density lipoprotein receptor-related protein 1 [Source:MGI Symbol;Acc:MGI:96828]
84	0	Scara5	1.00467	0.817	0.111	5.99e-171	9.2e-167	scavenger receptor class A, member 5 [Source:MGI Symbol;Acc:MGI:1918395]
85	0	Bmper	0.822146	0.537	0.018	1.78e-170	2.74e-166	BMP-binding endothelial regulator [Source:MGI Symbol;Acc:MGI:1920480]
86	0	Frmd6	1.11706	0.841	0.183	1.04e-168	1.6e-164	FERM domain containing 6 [Source:MGI Symbol;Acc:MGI:2442579]
87	0	Pcolce	1.44875	0.796	0.159	2.13e-168	3.27e-164	procollagen C-endopeptidase enhancer protein [Source:MGI Symbol;Acc:MGI:105099]
88	0	G0s2	1.01084	0.702	0.082	1.95e-167	3e-163	G0/G1 switch gene 2 [Source:MGI Symbol;Acc:MGI:1316737]
89	0	Nid1	1.20584	0.962	0.243	2.84e-166	4.36e-162	nidogen 1 [Source:MGI Symbol;Acc:MGI:97342]
90	0	Fbn1	0.664306	0.922	0.148	5.66e-166	8.69e-162	fibrillin 1 [Source:MGI Symbol;Acc:MGI:95489]
91	0	Ace	1.01393	0.785	0.117	1.15e-165	1.77e-161	angiotensin I converting enzyme (peptidyl-dipeptidase A) 1 [Source:MGI Symbol;Acc:MGI:87874]
92	0	Fxyd1	0.91473	0.875	0.156	2.17e-165	3.34e-161	FXYD domain-containing ion transport regulator 1 [Source:MGI Symbol;Acc:MGI:1889273]
93	0	Ltbp1	0.86439	0.727	0.096	1.16e-163	1.78e-159	latent transforming growth factor beta binding protein 1 [Source:MGI Symbol;Acc:MGI:109151]
94	0	Fbln1	1.05059	0.644	0.057	3.1e-163	4.76e-159	fibulin 1 [Source:MGI Symbol;Acc:MGI:95487]
95	0	Thsd7a	0.910288	0.642	0.067	1.32e-160	2.03e-156	thrombospondin, type I, domain containing 7A [Source:MGI Symbol;Acc:MGI:2685683]
96	0	Plpp3	1.25908	0.987	0.298	2.85e-160	4.37e-156	phospholipid phosphatase 3 [Source:MGI Symbol;Acc:MGI:1915166]
97	0	Pla1a	0.923283	0.848	0.129	3.15e-160	4.84e-156	phospholipase A1 member A [Source:MGI Symbol;Acc:MGI:1934677]
98	0	Ggt5	0.936845	0.682	0.089	2.75e-159	4.23e-155	gamma-glutamyltransferase 5 [Source:MGI Symbol;Acc:MGI:1346063]
99	0	Medag	0.952918	0.821	0.142	4.12e-159	6.34e-155	mesenteric estrogen dependent adipogenesis [Source:MGI Symbol;Acc:MGI:1917967]
100	0	Ddr2	0.945544	0.864	0.152	6.97e-159	1.07e-154	discoidin domain receptor family, member 2 [Source:MGI Symbol;Acc:MGI:1345277]
101	0	Col4a1	1.50468	0.946	0.319	6.16e-158	9.46e-154	collagen, type IV, alpha 1 [Source:MGI Symbol;Acc:MGI:88454]
102	0	Podn	0.734309	0.566	0.037	8.66e-158	1.33e-153	podocan [Source:MGI Symbol;Acc:MGI:2674939]
103	0	Igfbp7	1.3082	0.998	0.378	4.13e-157	6.34e-153	insulin-like growth factor binding protein 7 [Source:MGI Symbol;Acc:MGI:1352480]
104	0	Lamb1	1.06649	0.821	0.163	3.58e-153	5.5e-149	laminin B1 [Source:MGI Symbol;Acc:MGI:96743]
105	0	Rhoj	1.00929	0.87	0.226	8e-153	1.23e-148	ras homolog family member J [Source:MGI Symbol;Acc:MGI:1931551]
106	0	Lbp	0.968618	0.635	0.071	8.57e-152	1.32e-147	lipopolysaccharide binding protein [Source:MGI Symbol;Acc:MGI:1098776]
107	0	Cd248	0.814769	0.841	0.131	2.27e-151	3.49e-147	CD248 antigen, endosialin [Source:MGI Symbol;Acc:MGI:1917695]
108	0	C7	1.34626	0.497	0.022	1.87e-150	2.88e-146	complement component 7 [Source:MGI Symbol;Acc:MGI:88235]
109	0	Ndn	0.820274	0.682	0.092	1.44e-149	2.21e-145	necdin [Source:MGI Symbol;Acc:MGI:97290]
110	0	Rbms3	0.773706	0.707	0.102	5.24e-149	8.05e-145	RNA binding motif, single stranded interacting protein [Source:MGI Symbol;Acc:MGI:2444477]
111	0	Pcolce2	0.826638	0.81	0.115	1.13e-148	1.74e-144	procollagen C-endopeptidase enhancer 2 [Source:MGI Symbol;Acc:MGI:1923727]
112	0	Dclk1	0.872091	0.687	0.092	1.35e-148	2.08e-144	doublecortin-like kinase 1 [Source:MGI Symbol;Acc:MGI:1330861]
113	0	Gstm1	1.39303	0.957	0.394	1.38e-148	2.11e-144	glutathione S-transferase, mu 1 [Source:MGI Symbol;Acc:MGI:95860]
114	0	Htra1	0.929489	0.805	0.162	4.29e-146	6.6e-142	HtrA serine peptidase 1 [Source:MGI Symbol;Acc:MGI:1929076]
115	0	Gpx8	0.793705	0.725	0.122	1.64e-145	2.53e-141	glutathione peroxidase 8 (putative) [Source:MGI Symbol;Acc:MGI:1916840]
116	0	Sfrp1	1.1473	0.544	0.042	5.06e-143	7.78e-139	secreted frizzled-related protein 1 [Source:MGI Symbol;Acc:MGI:892014]
117	0	Lhfp	0.807574	0.705	0.117	5.38e-143	8.27e-139	lipoma HMGIC fusion partner [Source:MGI Symbol;Acc:MGI:1920048]
118	0	Efemp1	0.608433	0.879	0.142	5.86e-143	9.01e-139	epidermal growth factor-containing fibulin-like extracellular matrix protein 1 [Source:MGI Symbol;Acc:MGI:1339998]
119	0	Prrx1	0.757783	0.745	0.116	1.11e-142	1.71e-138	paired related homeobox 1 [Source:MGI Symbol;Acc:MGI:97712]
120	0	Ar	0.75052	0.678	0.096	2.56e-141	3.93e-137	androgen receptor [Source:MGI Symbol;Acc:MGI:88064]
121	0	Lrrc17	0.710159	0.624	0.073	3.06e-141	4.7e-137	leucine rich repeat containing 17 [Source:MGI Symbol;Acc:MGI:1921761]
122	0	Steap3	0.916361	0.81	0.186	6.74e-141	1.04e-136	STEAP family member 3 [Source:MGI Symbol;Acc:MGI:1915678]
123	0	Boc	0.739076	0.532	0.042	1.43e-140	2.2e-136	biregional cell adhesion molecule-related/down-regulated by oncogenes (Cdon) binding protein [Source:MGI Symbol;Acc:MGI:2151153]
124	0	Olfml3	0.720999	0.497	0.029	2.62e-140	4.03e-136	olfactomedin-like 3 [Source:MGI Symbol;Acc:MGI:1914877]
125	0	Vcan	0.843683	0.74	0.112	4.34e-140	6.67e-136	versican [Source:MGI Symbol;Acc:MGI:102889]
126	0	Nfix	0.910767	0.953	0.354	8.38e-138	1.29e-133	nuclear factor I/X [Source:MGI Symbol;Acc:MGI:97311]
127	0	Cpq	0.882684	0.843	0.232	4.95e-137	7.61e-133	carboxypeptidase Q [Source:MGI Symbol;Acc:MGI:1889205]
128	0	Il11ra1	0.936612	0.841	0.253	1.02e-136	1.56e-132	interleukin 11 receptor, alpha chain 1 [Source:MGI Symbol;Acc:MGI:107426]
129	0	Zbtb20	1.04038	0.996	0.585	1.35e-136	2.07e-132	zinc finger and BTB domain containing 20 [Source:MGI Symbol;Acc:MGI:1929213]
130	0	Fkbp7	0.828721	0.725	0.147	1.44e-135	2.22e-131	FK506 binding protein 7 [Source:MGI Symbol;Acc:MGI:1336879]
131	0	Islr	0.764593	0.718	0.105	3.54e-135	5.44e-131	immunoglobulin superfamily containing leucine-rich repeat [Source:MGI Symbol;Acc:MGI:1349645]
132	0	Sparc	1.37959	1	0.433	9.13e-135	1.4e-130	secreted acidic cysteine rich glycoprotein [Source:MGI Symbol;Acc:MGI:98373]
133	0	Nfia	0.920178	0.879	0.278	3e-133	4.61e-129	nuclear factor I/A [Source:MGI Symbol;Acc:MGI:108056]
134	0	Efemp2	0.721431	0.707	0.127	1.59e-132	2.44e-128	epidermal growth factor-containing fibulin-like extracellular matrix protein 2 [Source:MGI Symbol;Acc:MGI:1891209]
135	0	Gstm2	0.777068	0.709	0.129	2.78e-132	4.27e-128	glutathione S-transferase, mu 2 [Source:MGI Symbol;Acc:MGI:95861]
136	0	F3	0.925513	0.562	0.065	7.97e-132	1.22e-127	coagulation factor III [Source:MGI Symbol;Acc:MGI:88381]
137	0	Il1r1	0.728969	0.577	0.073	8.09e-132	1.24e-127	interleukin 1 receptor, type I [Source:MGI Symbol;Acc:MGI:96545]
138	0	Gpc3	0.726632	0.626	0.086	1.78e-130	2.73e-126	glypican 3 [Source:MGI Symbol;Acc:MGI:104903]
139	0	Cd63	1.01604	0.996	0.579	5.27e-130	8.09e-126	CD63 antigen [Source:MGI Symbol;Acc:MGI:99529]
140	0	Ecm2	0.741001	0.617	0.09	3.18e-129	4.88e-125	extracellular matrix protein 2, female organ and adipocyte specific [Source:MGI Symbol;Acc:MGI:3039578]
141	0	Mt1	1.32358	0.996	0.636	1.35e-128	2.08e-124	metallothionein 1 [Source:MGI Symbol;Acc:MGI:97171]
142	0	Col4a2	1.0239	0.895	0.251	1.73e-128	2.65e-124	collagen, type IV, alpha 2 [Source:MGI Symbol;Acc:MGI:88455]
143	0	Colec12	0.709464	0.711	0.127	2.23e-128	3.43e-124	collectin sub-family member 12 [Source:MGI Symbol;Acc:MGI:2152907]
144	0	Ctsl	0.899244	0.991	0.643	5.64e-128	8.67e-124	cathepsin L [Source:MGI Symbol;Acc:MGI:88564]
145	0	Apod	1.01601	0.445	0.024	1.15e-127	1.77e-123	apolipoprotein D [Source:MGI Symbol;Acc:MGI:88056]
146	0	Ddah2	0.800059	0.877	0.238	2.25e-126	3.46e-122	dimethylarginine dimethylaminohydrolase 2 [Source:MGI Symbol;Acc:MGI:1859016]
147	0	Ltbp4	0.864861	0.922	0.261	5.17e-126	7.94e-122	latent transforming growth factor beta binding protein 4 [Source:MGI Symbol;Acc:MGI:1321395]
148	0	Nfib	0.857056	0.935	0.278	1.65e-125	2.54e-121	nuclear factor I/B [Source:MGI Symbol;Acc:MGI:103188]
149	0	Snhg18	0.640179	0.604	0.084	1.24e-124	1.91e-120	small nucleolar RNA host gene 18 [Source:MGI Symbol;Acc:MGI:1914085]
150	0	Srpx2	0.643399	0.51	0.051	1.5e-124	2.31e-120	sushi-repeat-containing protein, X-linked 2 [Source:MGI Symbol;Acc:MGI:1916042]
151	0	Mgst1	0.919696	0.944	0.439	2.34e-124	3.59e-120	microsomal glutathione S-transferase 1 [Source:MGI Symbol;Acc:MGI:1913850]
152	0	Hspg2	0.965131	0.861	0.249	7.64e-124	1.17e-119	perlecan (heparan sulfate proteoglycan 2) [Source:MGI Symbol;Acc:MGI:96257]
153	0	Gstt1	0.706412	0.689	0.129	4.9e-123	7.53e-119	glutathione S-transferase, theta 1 [Source:MGI Symbol;Acc:MGI:107379]
154	0	Pdgfrb	0.61651	0.62	0.086	9.76e-123	1.5e-118	platelet derived growth factor receptor, beta polypeptide [Source:MGI Symbol;Acc:MGI:97531]
155	0	Gfpt2	0.814512	0.68	0.106	4.41e-122	6.78e-118	glutamine fructose-6-phosphate transaminase 2 [Source:MGI Symbol;Acc:MGI:1338883]
156	0	Plat	0.852751	0.709	0.139	5.5e-122	8.45e-118	plasminogen activator, tissue [Source:MGI Symbol;Acc:MGI:97610]
157	0	Ecm1	0.981889	0.966	0.412	2.65e-121	4.07e-117	extracellular matrix protein 1 [Source:MGI Symbol;Acc:MGI:103060]
158	0	Cald1	0.798446	0.937	0.306	2.69e-121	4.14e-117	caldesmon 1 [Source:MGI Symbol;Acc:MGI:88250]
159	0	Loxl2	0.735145	0.653	0.115	1.96e-120	3.01e-116	lysyl oxidase-like 2 [Source:MGI Symbol;Acc:MGI:2137913]
160	0	Nedd4	0.89049	0.982	0.353	6.2e-120	9.53e-116	neural precursor cell expressed, developmentally down-regulated 4 [Source:MGI Symbol;Acc:MGI:97297]
161	0	Serpina3n	0.715226	0.412	0.019	9.94e-120	1.53e-115	serine (or cysteine) peptidase inhibitor, clade A, member 3N [Source:MGI Symbol;Acc:MGI:105045]
162	0	Atp1a2	0.599853	0.49	0.046	9.29e-119	1.43e-114	ATPase, Na+/K+ transporting, alpha 2 polypeptide [Source:MGI Symbol;Acc:MGI:88106]
163	0	Cxcl1	1.38978	0.843	0.283	2.91e-118	4.47e-114	chemokine (C-X-C motif) ligand 1 [Source:MGI Symbol;Acc:MGI:108068]
164	0	Wt1	0.730418	0.588	0.085	9.59e-118	1.47e-113	Wilms tumor 1 homolog [Source:MGI Symbol;Acc:MGI:98968]
165	0	C1qtnf7	0.557669	0.49	0.046	1.16e-117	1.79e-113	C1q and tumor necrosis factor related protein 7 [Source:MGI Symbol;Acc:MGI:1925911]
166	0	Csf1	0.679435	0.678	0.124	1.54e-117	2.37e-113	colony stimulating factor 1 (macrophage) [Source:MGI Symbol;Acc:MGI:1339753]
167	0	Hmcn2	0.650346	0.36	0.006	1.76e-117	2.71e-113	hemicentin 2 [Source:MGI Symbol;Acc:MGI:2677838]
168	0	Ptgis	0.614277	0.702	0.118	3.15e-117	4.83e-113	prostaglandin I2 (prostacyclin) synthase [Source:MGI Symbol;Acc:MGI:1097156]
169	0	Matn2	0.748005	0.503	0.054	5.21e-117	8.01e-113	matrilin 2 [Source:MGI Symbol;Acc:MGI:109613]
170	0	Myc	0.973237	0.609	0.109	7.28e-117	1.12e-112	myelocytomatosis oncogene [Source:MGI Symbol;Acc:MGI:97250]
171	0	Gstm5	0.876575	0.64	0.122	7.53e-117	1.16e-112	glutathione S-transferase, mu 5 [Source:MGI Symbol;Acc:MGI:1309466]
172	0	Creb3l1	0.67471	0.523	0.066	8.77e-117	1.35e-112	cAMP responsive element binding protein 3-like 1 [Source:MGI Symbol;Acc:MGI:1347062]
173	0	Vwa1	0.748898	0.597	0.099	9.71e-117	1.49e-112	von Willebrand factor A domain containing 1 [Source:MGI Symbol;Acc:MGI:2179729]
174	0	P3h3	0.635628	0.559	0.08	4.07e-116	6.26e-112	prolyl 3-hydroxylase 3 [Source:MGI Symbol;Acc:MGI:1315208]
175	0	Ifi204	0.889146	0.864	0.303	1.21e-115	1.86e-111	interferon activated gene 204 [Source:MGI Symbol;Acc:MGI:96429]
176	0	Atf5	0.78107	0.743	0.187	2.78e-115	4.27e-111	activating transcription factor 5 [Source:MGI Symbol;Acc:MGI:2141857]
177	0	Klf9	0.966803	0.937	0.443	2.84e-115	4.36e-111	Kruppel-like factor 9 [Source:MGI Symbol;Acc:MGI:1333856]
178	0	Errfi1	1.0079	0.89	0.32	9.74e-115	1.5e-110	ERBB receptor feedback inhibitor 1 [Source:MGI Symbol;Acc:MGI:1921405]
179	0	Mrc2	0.567088	0.425	0.029	1.18e-114	1.81e-110	mannose receptor, C type 2 [Source:MGI Symbol;Acc:MGI:107818]
180	0	Mt2	1.17185	0.886	0.336	2.25e-114	3.45e-110	metallothionein 2 [Source:MGI Symbol;Acc:MGI:97172]
181	0	Naalad2	0.635234	0.588	0.092	1.71e-113	2.63e-109	N-acetylated alpha-linked acidic dipeptidase 2 [Source:MGI Symbol;Acc:MGI:1919810]
182	0	Maged2	0.790696	0.655	0.14	8.04e-113	1.24e-108	melanoma antigen, family D, 2 [Source:MGI Symbol;Acc:MGI:1933391]
183	0	Nenf	0.797192	0.949	0.435	2.22e-112	3.41e-108	neuron derived neurotrophic factor [Source:MGI Symbol;Acc:MGI:1913458]
184	0	Fst	0.887191	0.519	0.065	2.53e-112	3.89e-108	follistatin [Source:MGI Symbol;Acc:MGI:95586]
185	0	Adamts4	1.10242	0.519	0.068	7.32e-112	1.12e-107	a disintegrin-like and metallopeptidase (reprolysin type) with thrombospondin type 1 motif, 4 [Source:MGI Symbol;Acc:MGI:1339949]
186	0	Nmb	0.900598	0.461	0.044	8.12e-112	1.25e-107	neuromedin B [Source:MGI Symbol;Acc:MGI:1915289]
187	0	Lgi2	0.641479	0.595	0.088	9.9e-112	1.52e-107	leucine-rich repeat LGI family, member 2 [Source:MGI Symbol;Acc:MGI:2180196]
188	0	Tmeff2	0.600505	0.492	0.055	4.12e-111	6.33e-107	transmembrane protein with EGF-like and two follistatin-like domains 2 [Source:MGI Symbol;Acc:MGI:1861735]
189	0	Mxra7	0.68094	0.74	0.19	4.35e-111	6.69e-107	matrix-remodelling associated 7 [Source:MGI Symbol;Acc:MGI:1914872]
190	0	Sparcl1	0.810477	0.924	0.266	4.9e-111	7.53e-107	SPARC-like 1 [Source:MGI Symbol;Acc:MGI:108110]
191	0	Cd302	0.846935	0.908	0.425	2.2e-110	3.38e-106	CD302 antigen [Source:MGI Symbol;Acc:MGI:1913455]
192	0	Vldlr	0.652005	0.568	0.083	7.01e-110	1.08e-105	very low density lipoprotein receptor [Source:MGI Symbol;Acc:MGI:98935]
193	0	Cyb5a	0.799851	0.962	0.647	1.62e-109	2.48e-105	cytochrome b5 type A (microsomal) [Source:MGI Symbol;Acc:MGI:1926952]
194	0	Slc16a2	0.508325	0.465	0.046	2.41e-109	3.71e-105	solute carrier family 16 (monocarboxylic acid transporters), member 2 [Source:MGI Symbol;Acc:MGI:1203732]
195	0	Tril	0.650362	0.501	0.063	2.98e-109	4.58e-105	TLR4 interactor with leucine-rich repeats [Source:MGI Symbol;Acc:MGI:1914123]
196	0	Vcam1	0.653391	0.559	0.084	5.33e-109	8.19e-105	vascular cell adhesion molecule 1 [Source:MGI Symbol;Acc:MGI:98926]
197	0	Khdrbs3	0.544942	0.454	0.044	7.08e-109	1.09e-104	KH domain containing, RNA binding, signal transduction associated 3 [Source:MGI Symbol;Acc:MGI:1313312]
198	0	Ppic	0.776663	0.754	0.197	7.5e-109	1.15e-104	peptidylprolyl isomerase C [Source:MGI Symbol;Acc:MGI:97751]
199	0	Enpp2	0.690254	0.539	0.077	1.49e-108	2.29e-104	ectonucleotide pyrophosphatase/phosphodiesterase 2 [Source:MGI Symbol;Acc:MGI:1321390]
200	0	Rnase4	0.821917	0.98	0.392	3.7e-108	5.69e-104	ribonuclease, RNase A family 4 [Source:MGI Symbol;Acc:MGI:1926217]
201	0	Mgp	2.07339	0.604	0.117	3.88e-108	5.97e-104	matrix Gla protein [Source:MGI Symbol;Acc:MGI:96976]
202	0	Nbl1	0.748679	0.702	0.15	7.79e-108	1.2e-103	NBL1, DAN family BMP antagonist [Source:MGI Symbol;Acc:MGI:104591]
203	0	Oaf	0.801675	0.707	0.171	5.68e-107	8.73e-103	out at first homolog [Source:MGI Symbol;Acc:MGI:94852]
204	0	Aoc3	0.533039	0.488	0.054	8.86e-107	1.36e-102	amine oxidase, copper containing 3 [Source:MGI Symbol;Acc:MGI:1306797]
205	0	Scarf2	0.500573	0.421	0.032	2.92e-106	4.49e-102	scavenger receptor class F, member 2 [Source:MGI Symbol;Acc:MGI:1858430]
206	0	Lamb2	0.707989	0.761	0.197	5.51e-106	8.47e-102	laminin, beta 2 [Source:MGI Symbol;Acc:MGI:99916]
207	0	Ugdh	1.01037	0.743	0.193	7.01e-106	1.08e-101	UDP-glucose dehydrogenase [Source:MGI Symbol;Acc:MGI:1306785]
208	0	Sgce	0.599039	0.642	0.136	2.72e-105	4.18e-101	sarcoglycan, epsilon [Source:MGI Symbol;Acc:MGI:1329042]
209	0	Plau	0.760689	0.595	0.114	2.93e-104	4.5e-100	plasminogen activator, urokinase [Source:MGI Symbol;Acc:MGI:97611]
210	0	Calu	0.74044	0.89	0.356	6.76e-104	1.04e-99	calumenin [Source:MGI Symbol;Acc:MGI:1097158]
211	0	Thbs3	0.587694	0.546	0.086	1.23e-103	1.89e-99	thrombospondin 3 [Source:MGI Symbol;Acc:MGI:98739]
212	0	Kdelr3	0.489409	0.443	0.045	4.19e-103	6.43e-99	KDEL (Lys-Asp-Glu-Leu) endoplasmic reticulum protein retention receptor 3 [Source:MGI Symbol;Acc:MGI:2145953]
213	0	Dpysl3	0.628195	0.705	0.159	4.56e-103	7e-99	dihydropyrimidinase-like 3 [Source:MGI Symbol;Acc:MGI:1349762]
214	0	Gxylt2	0.641131	0.499	0.067	3.41e-102	5.24e-98	glucoside xylosyltransferase 2 [Source:MGI Symbol;Acc:MGI:2682940]
215	0	Sntb2	0.646724	0.783	0.219	4.33e-102	6.65e-98	syntrophin, basic 2 [Source:MGI Symbol;Acc:MGI:101771]
216	0	Plxdc2	0.709457	0.812	0.239	4.92e-102	7.55e-98	plexin domain containing 2 [Source:MGI Symbol;Acc:MGI:1914698]
217	0	S100a6	0.873775	0.998	0.836	1.11e-101	1.71e-97	S100 calcium binding protein A6 (calcyclin) [Source:MGI Symbol;Acc:MGI:1339467]
218	0	Agt	0.952431	0.338	0.011	1.12e-101	1.72e-97	angiotensinogen (serpin peptidase inhibitor, clade A, member 8) [Source:MGI Symbol;Acc:MGI:87963]
219	0	Olfml2b	0.639999	0.539	0.083	2.13e-101	3.28e-97	olfactomedin-like 2B [Source:MGI Symbol;Acc:MGI:2443310]
220	0	Tgfbr3	0.666659	0.823	0.231	2.47e-101	3.79e-97	transforming growth factor, beta receptor III [Source:MGI Symbol;Acc:MGI:104637]
221	0	Cd34	0.595505	0.919	0.254	2.66e-101	4.09e-97	CD34 antigen [Source:MGI Symbol;Acc:MGI:88329]
222	0	Nrep	0.808545	0.521	0.084	1.35e-100	2.08e-96	neuronal regeneration related protein [Source:MGI Symbol;Acc:MGI:99444]
223	0	Sned1	0.742357	0.421	0.04	6.03e-100	9.26e-96	sushi, nidogen and EGF-like domains 1 [Source:MGI Symbol;Acc:MGI:3045960]
224	0	Fkbp10	0.524902	0.47	0.059	7.96e-100	1.22e-95	FK506 binding protein 10 [Source:MGI Symbol;Acc:MGI:104769]
225	0	Fkbp9	0.679079	0.749	0.224	9.41e-100	1.45e-95	FK506 binding protein 9 [Source:MGI Symbol;Acc:MGI:1350921]
226	0	Nupr1	0.848416	0.799	0.275	2.67e-99	4.1e-95	nuclear protein transcription regulator 1 [Source:MGI Symbol;Acc:MGI:1891834]
227	0	Spon2	0.563944	0.353	0.018	2.88e-99	4.43e-95	spondin 2, extracellular matrix protein [Source:MGI Symbol;Acc:MGI:1923724]
228	0	Ebf2	0.638941	0.633	0.126	3.07e-99	4.72e-95	early B cell factor 2 [Source:MGI Symbol;Acc:MGI:894332]
229	0	Ly6a	0.889211	0.962	0.358	3.26e-99	5.01e-95	lymphocyte antigen 6 complex, locus A [Source:MGI Symbol;Acc:MGI:107527]
230	0	Sod3	0.5701	0.494	0.07	1.81e-98	2.79e-94	superoxide dismutase 3, extracellular [Source:MGI Symbol;Acc:MGI:103181]
231	0	Pdpn	0.569437	0.579	0.105	2.04e-98	3.13e-94	podoplanin [Source:MGI Symbol;Acc:MGI:103098]
232	0	Aldh1a3	0.736045	0.523	0.081	5.2e-98	7.99e-94	aldehyde dehydrogenase family 1, subfamily A3 [Source:MGI Symbol;Acc:MGI:1861722]
233	0	Ptges	0.484054	0.418	0.041	1.77e-97	2.72e-93	prostaglandin E synthase [Source:MGI Symbol;Acc:MGI:1927593]
234	0	Rcn1	0.587221	0.64	0.143	1.86e-97	2.86e-93	reticulocalbin 1 [Source:MGI Symbol;Acc:MGI:104559]
235	0	Eln	0.730511	0.474	0.064	9.01e-97	1.38e-92	elastin [Source:MGI Symbol;Acc:MGI:95317]
236	0	Tuba1a	0.702395	0.975	0.559	2.46e-96	3.78e-92	tubulin, alpha 1A [Source:MGI Symbol;Acc:MGI:98869]
237	0	Antxr1	0.575314	0.564	0.099	3.46e-96	5.32e-92	anthrax toxin receptor 1 [Source:MGI Symbol;Acc:MGI:1916788]
238	0	Has1	1.39434	0.519	0.086	5.75e-96	8.84e-92	hyaluronan synthase 1 [Source:MGI Symbol;Acc:MGI:106590]
239	0	Fndc3b	0.679918	0.765	0.255	3.67e-95	5.64e-91	fibronectin type III domain containing 3B [Source:MGI Symbol;Acc:MGI:1919257]
240	0	Pbx1	0.654278	0.702	0.189	4.72e-95	7.25e-91	pre B cell leukemia homeobox 1 [Source:MGI Symbol;Acc:MGI:97495]
241	0	Mfap2	0.642869	0.387	0.035	9.54e-94	1.47e-89	microfibrillar-associated protein 2 [Source:MGI Symbol;Acc:MGI:99559]
242	0	S100a16	0.666848	0.879	0.284	2.17e-93	3.33e-89	S100 calcium binding protein A16 [Source:MGI Symbol;Acc:MGI:1915110]
243	0	H6pd	0.554381	0.506	0.086	2.83e-93	4.35e-89	hexose-6-phosphate dehydrogenase (glucose 1-dehydrogenase) [Source:MGI Symbol;Acc:MGI:2140356]
244	0	Osmr	0.602886	0.582	0.117	2.99e-93	4.6e-89	oncostatin M receptor [Source:MGI Symbol;Acc:MGI:1330819]
245	0	Ntrk2	0.521731	0.383	0.033	7.79e-93	1.2e-88	neurotrophic tyrosine kinase, receptor, type 2 [Source:MGI Symbol;Acc:MGI:97384]
246	0	Thbs1	1.43467	0.579	0.139	1.28e-92	1.97e-88	thrombospondin 1 [Source:MGI Symbol;Acc:MGI:98737]
247	0	Fn1	0.510362	0.877	0.255	2.04e-92	3.13e-88	fibronectin 1 [Source:MGI Symbol;Acc:MGI:95566]
248	0	Il17d	0.428359	0.347	0.022	3.75e-92	5.77e-88	interleukin 17D [Source:MGI Symbol;Acc:MGI:2446510]
249	0	Igsf10	0.533083	0.407	0.044	3.89e-92	5.98e-88	immunoglobulin superfamily, member 10 [Source:MGI Symbol;Acc:MGI:1923481]
250	0	Adgrd1	0.567343	0.593	0.108	4.54e-92	6.98e-88	adhesion G protein-coupled receptor D1 [Source:MGI Symbol;Acc:MGI:3041203]
251	0	Man2a1	0.77317	0.783	0.29	1.11e-91	1.7e-87	mannosidase 2, alpha 1 [Source:MGI Symbol;Acc:MGI:104669]
252	0	Ptgfrn	0.526213	0.553	0.104	1.87e-91	2.88e-87	prostaglandin F2 receptor negative regulator [Source:MGI Symbol;Acc:MGI:1277114]
253	0	Aox3	0.486204	0.336	0.02	7.62e-91	1.17e-86	aldehyde oxidase 3 [Source:MGI Symbol;Acc:MGI:1918974]
254	0	Tshz2	0.611351	0.89	0.283	8.67e-91	1.33e-86	teashirt zinc finger family member 2 [Source:MGI Symbol;Acc:MGI:2153084]
255	0	Antxr2	0.663769	0.819	0.299	1.04e-90	1.6e-86	anthrax toxin receptor 2 [Source:MGI Symbol;Acc:MGI:1919164]
256	0	Lysmd2	0.578633	0.577	0.121	1.2e-90	1.85e-86	LysM, putative peptidoglycan-binding, domain containing 2 [Source:MGI Symbol;Acc:MGI:1917332]
257	0	Gem	0.730663	0.609	0.137	1.52e-90	2.34e-86	GTP binding protein (gene overexpressed in skeletal muscle) [Source:MGI Symbol;Acc:MGI:99844]
258	0	Ebf1	0.602823	0.866	0.263	6.62e-90	1.02e-85	early B cell factor 1 [Source:MGI Symbol;Acc:MGI:95275]
259	0	C1qtnf6	0.537556	0.425	0.053	1.01e-89	1.56e-85	C1q and tumor necrosis factor related protein 6 [Source:MGI Symbol;Acc:MGI:1919959]
260	0	Timp2	0.731073	1	0.569	1.14e-89	1.75e-85	tissue inhibitor of metalloproteinase 2 [Source:MGI Symbol;Acc:MGI:98753]
261	0	Abca8b	0.559962	0.434	0.057	3.77e-89	5.79e-85	ATP-binding cassette, sub-family A (ABC1), member 8b [Source:MGI Symbol;Acc:MGI:1351668]
262	0	Ikbip	0.538942	0.62	0.154	4.42e-89	6.8e-85	IKBKB interacting protein [Source:MGI Symbol;Acc:MGI:1914704]
263	0	Col18a1	0.436399	0.503	0.082	8.53e-89	1.31e-84	collagen, type XVIII, alpha 1 [Source:MGI Symbol;Acc:MGI:88451]
264	0	Lrrn4cl	0.610712	0.539	0.097	6.4e-88	9.83e-84	LRRN4 C-terminal like [Source:MGI Symbol;Acc:MGI:1916102]
265	0	Lpar1	0.607645	0.658	0.171	2.62e-87	4.02e-83	lysophosphatidic acid receptor 1 [Source:MGI Symbol;Acc:MGI:108429]
266	0	Pcsk5	0.498224	0.4	0.046	2.85e-87	4.38e-83	proprotein convertase subtilisin/kexin type 5 [Source:MGI Symbol;Acc:MGI:97515]
267	0	Laptm4a	0.64323	0.978	0.669	3.52e-87	5.42e-83	lysosomal-associated protein transmembrane 4A [Source:MGI Symbol;Acc:MGI:108017]
268	0	Maged1	0.591783	0.696	0.208	7.07e-87	1.09e-82	melanoma antigen, family D, 1 [Source:MGI Symbol;Acc:MGI:1930187]
269	0	Irs2	0.804797	0.68	0.21	1.75e-86	2.69e-82	insulin receptor substrate 2 [Source:MGI Symbol;Acc:MGI:109334]
270	0	Nova1	0.519687	0.432	0.062	1.02e-85	1.57e-81	NOVA alternative splicing regulator 1 [Source:MGI Symbol;Acc:MGI:104297]
271	0	Arl4a	0.792925	0.812	0.323	3.66e-85	5.62e-81	ADP-ribosylation factor-like 4A [Source:MGI Symbol;Acc:MGI:99437]
272	0	Prss23	0.493403	0.658	0.143	3.81e-85	5.85e-81	protease, serine 23 [Source:MGI Symbol;Acc:MGI:1923703]
273	0	Ppl	0.505145	0.365	0.034	7.84e-85	1.21e-80	periplakin [Source:MGI Symbol;Acc:MGI:1194898]
274	0	Gli3	0.420782	0.365	0.035	1.27e-84	1.95e-80	GLI-Kruppel family member GLI3 [Source:MGI Symbol;Acc:MGI:95729]
275	0	Prrx2	0.379794	0.322	0.021	3.05e-84	4.69e-80	paired related homeobox 2 [Source:MGI Symbol;Acc:MGI:98218]
276	0	Meis2	0.507612	0.47	0.078	4.17e-84	6.41e-80	Meis homeobox 2 [Source:MGI Symbol;Acc:MGI:108564]
277	0	Vit	0.583101	0.436	0.063	4.23e-84	6.5e-80	vitrin [Source:MGI Symbol;Acc:MGI:1921449]
278	0	Lama4	0.691415	0.678	0.181	9.96e-84	1.53e-79	laminin, alpha 4 [Source:MGI Symbol;Acc:MGI:109321]
279	0	Cped1	0.522797	0.517	0.103	2.23e-83	3.43e-79	cadherin-like and PC-esterase domain containing 1 [Source:MGI Symbol;Acc:MGI:2444814]
280	0	Arhgap32	0.4143	0.34	0.029	1.07e-82	1.64e-78	Rho GTPase activating protein 32 [Source:MGI Symbol;Acc:MGI:2450166]
281	0	Adamts1	0.660125	0.832	0.264	1.15e-82	1.76e-78	a disintegrin-like and metallopeptidase (reprolysin type) with thrombospondin type 1 motif, 1 [Source:MGI Symbol;Acc:MGI:109249]
282	0	Adam23	0.485241	0.358	0.034	1.78e-82	2.74e-78	a disintegrin and metallopeptidase domain 23 [Source:MGI Symbol;Acc:MGI:1345162]
283	0	Nnmt	0.470727	0.553	0.123	1.9e-82	2.91e-78	nicotinamide N-methyltransferase [Source:MGI Symbol;Acc:MGI:1099443]
284	0	Adh1	0.536384	0.461	0.077	7.06e-82	1.08e-77	alcohol dehydrogenase 1 (class I) [Source:MGI Symbol;Acc:MGI:87921]
285	0	Plod2	0.499097	0.454	0.075	8.1e-82	1.24e-77	procollagen lysine, 2-oxoglutarate 5-dioxygenase 2 [Source:MGI Symbol;Acc:MGI:1347007]
286	0	Cyth3	0.573582	0.664	0.2	9.99e-82	1.54e-77	cytohesin 3 [Source:MGI Symbol;Acc:MGI:1335107]
287	0	Id3	0.931525	0.861	0.37	4.32e-81	6.64e-77	inhibitor of DNA binding 3 [Source:MGI Symbol;Acc:MGI:96398]
288	0	Map1b	0.575159	0.635	0.162	5.02e-81	7.71e-77	microtubule-associated protein 1B [Source:MGI Symbol;Acc:MGI:1306778]
289	0	Arhgap20	0.568945	0.488	0.088	5.22e-81	8.02e-77	Rho GTPase activating protein 20 [Source:MGI Symbol;Acc:MGI:2445175]
290	0	Fos	0.778363	0.987	0.847	6.89e-81	1.06e-76	FBJ osteosarcoma oncogene [Source:MGI Symbol;Acc:MGI:95574]
291	0	Nav1	0.740281	0.908	0.518	1.78e-80	2.74e-76	neuron navigator 1 [Source:MGI Symbol;Acc:MGI:2183683]
292	0	Fbln5	0.581749	0.613	0.153	2.79e-80	4.28e-76	fibulin 5 [Source:MGI Symbol;Acc:MGI:1346091]
293	0	Sult5a1	0.503221	0.385	0.046	3e-80	4.61e-76	sulfotransferase family 5A, member 1 [Source:MGI Symbol;Acc:MGI:1931463]
294	0	Hmgcs2	0.466213	0.427	0.065	3.49e-80	5.37e-76	3-hydroxy-3-methylglutaryl-Coenzyme A synthase 2 [Source:MGI Symbol;Acc:MGI:101939]
295	0	Igfbp4	0.804488	0.922	0.445	4.41e-80	6.78e-76	insulin-like growth factor binding protein 4 [Source:MGI Symbol;Acc:MGI:96439]
296	0	Lima1	0.682738	0.884	0.409	5.45e-80	8.37e-76	LIM domain and actin binding 1 [Source:MGI Symbol;Acc:MGI:1920992]
297	0	Txndc5	0.5924	0.732	0.249	5.65e-80	8.68e-76	thioredoxin domain containing 5 [Source:MGI Symbol;Acc:MGI:2145316]
298	0	Vkorc1	0.588391	0.642	0.193	5.87e-80	9.02e-76	vitamin K epoxide reductase complex, subunit 1 [Source:MGI Symbol;Acc:MGI:106442]
299	0	Gpr153	0.435251	0.394	0.051	6.85e-80	1.05e-75	G protein-coupled receptor 153 [Source:MGI Symbol;Acc:MGI:1916157]
300	0	Axl	0.57688	0.785	0.261	1.09e-79	1.67e-75	AXL receptor tyrosine kinase [Source:MGI Symbol;Acc:MGI:1347244]
301	0	Nid2	0.506087	0.488	0.093	2.51e-79	3.86e-75	nidogen 2 [Source:MGI Symbol;Acc:MGI:1298229]
302	0	Fap	0.435732	0.365	0.042	2.85e-79	4.38e-75	fibroblast activation protein [Source:MGI Symbol;Acc:MGI:109608]
303	0	Cd9	0.844242	0.812	0.35	3.85e-79	5.92e-75	CD9 antigen [Source:MGI Symbol;Acc:MGI:88348]
304	0	Scara3	0.478226	0.523	0.096	1.06e-78	1.62e-74	scavenger receptor class A, member 3 [Source:MGI Symbol;Acc:MGI:2444418]
305	0	Twist2	0.342672	0.273	0.012	1.82e-78	2.8e-74	twist basic helix-loop-helix transcription factor 2 [Source:MGI Symbol;Acc:MGI:104685]
306	0	Gpnmb	0.323802	0.436	0.065	1.98e-78	3.04e-74	glycoprotein (transmembrane) nmb [Source:MGI Symbol;Acc:MGI:1934765]
307	0	Il6	1.05341	0.477	0.094	2.17e-78	3.34e-74	interleukin 6 [Source:MGI Symbol;Acc:MGI:96559]
308	0	Scn1b	0.537742	0.626	0.181	3.37e-78	5.18e-74	sodium channel, voltage-gated, type I, beta [Source:MGI Symbol;Acc:MGI:98247]
309	0	Prnp	0.538588	0.705	0.221	4.3e-78	6.61e-74	prion protein [Source:MGI Symbol;Acc:MGI:97769]
310	0	Rab34	0.480856	0.459	0.084	6.66e-78	1.02e-73	RAB34, member RAS oncogene family [Source:MGI Symbol;Acc:MGI:104606]
311	0	Clmp	0.558284	0.515	0.115	7.31e-78	1.12e-73	CXADR-like membrane protein [Source:MGI Symbol;Acc:MGI:1918816]
312	0	Tmed3	0.65808	0.877	0.46	8.81e-78	1.35e-73	transmembrane p24 trafficking protein 3 [Source:MGI Symbol;Acc:MGI:1913361]
313	0	B3gnt9	0.416842	0.378	0.049	2.48e-77	3.81e-73	UDP-GlcNAc:betaGal beta-1,3-N-acetylglucosaminyltransferase 9 [Source:MGI Symbol;Acc:MGI:2142841]
314	0	Timp1	0.793626	0.362	0.044	1.2e-76	1.84e-72	tissue inhibitor of metalloproteinase 1 [Source:MGI Symbol;Acc:MGI:98752]
315	0	Pcdh7	0.496916	0.403	0.061	1.27e-76	1.94e-72	protocadherin 7 [Source:MGI Symbol;Acc:MGI:1860487]
316	0	Tmod2	0.461318	0.438	0.073	2.19e-76	3.36e-72	tropomodulin 2 [Source:MGI Symbol;Acc:MGI:1355335]
317	0	Aldh1a1	0.439926	0.434	0.069	2.78e-76	4.27e-72	aldehyde dehydrogenase family 1, subfamily A1 [Source:MGI Symbol;Acc:MGI:1353450]
318	0	Socs3	1.053	0.843	0.446	2.86e-76	4.39e-72	suppressor of cytokine signaling 3 [Source:MGI Symbol;Acc:MGI:1201791]
319	0	Sfxn1	0.510896	0.664	0.206	5.62e-76	8.64e-72	sideroflexin 1 [Source:MGI Symbol;Acc:MGI:2137677]
320	0	Heg1	0.601213	0.772	0.253	6.43e-76	9.88e-72	heart development protein with EGF-like domains 1 [Source:MGI Symbol;Acc:MGI:1924696]
321	0	Meg3	0.917637	0.532	0.115	9.19e-76	1.41e-71	maternally expressed 3 [Source:MGI Symbol;Acc:MGI:1202886]
322	0	Wipi1	0.487858	0.564	0.143	1.18e-75	1.81e-71	WD repeat domain, phosphoinositide interacting 1 [Source:MGI Symbol;Acc:MGI:1261864]
323	0	Bmpr1a	0.428241	0.461	0.086	2.24e-75	3.44e-71	bone morphogenetic protein receptor, type 1A [Source:MGI Symbol;Acc:MGI:1338938]
324	0	Abca6	0.48474	0.391	0.057	3.56e-75	5.47e-71	ATP-binding cassette, sub-family A (ABC1), member 6 [Source:MGI Symbol;Acc:MGI:1923434]
325	0	Hspb8	0.459713	0.452	0.08	5.29e-74	8.13e-70	heat shock protein 8 [Source:MGI Symbol;Acc:MGI:2135756]
326	0	Ssc5d	0.392138	0.353	0.043	3.35e-73	5.15e-69	scavenger receptor cysteine rich family, 5 domains [Source:MGI Symbol;Acc:MGI:3606211]
327	0	Cryab	0.455879	0.555	0.135	4.1e-73	6.31e-69	crystallin, alpha B [Source:MGI Symbol;Acc:MGI:88516]
328	0	Ces2g	0.382219	0.327	0.034	1.88e-72	2.88e-68	carboxylesterase 2G [Source:MGI Symbol;Acc:MGI:1919611]
329	0	Tmem150a	0.452622	0.349	0.043	2.11e-72	3.24e-68	transmembrane protein 150A [Source:MGI Symbol;Acc:MGI:2385244]
330	0	Col4a4	0.402872	0.282	0.02	2.58e-72	3.97e-68	collagen, type IV, alpha 4 [Source:MGI Symbol;Acc:MGI:104687]
331	0	Plce1	0.411344	0.452	0.084	3.17e-72	4.88e-68	phospholipase C, epsilon 1 [Source:MGI Symbol;Acc:MGI:1921305]
332	0	P4ha2	0.428481	0.371	0.053	3.9e-72	5.99e-68	procollagen-proline, 2-oxoglutarate 4-dioxygenase (proline 4-hydroxylase), alpha II polypeptide [Source:MGI Symbol;Acc:MGI:894286]
333	0	Rcn3	0.555505	0.776	0.269	5.1e-72	7.83e-68	reticulocalbin 3, EF-hand calcium binding domain [Source:MGI Symbol;Acc:MGI:1277122]
334	0	Osr1	0.559799	0.463	0.09	5.25e-72	8.07e-68	odd-skipped related transcription factor 1 [Source:MGI Symbol;Acc:MGI:1344424]
335	0	Slit2	0.439604	0.282	0.02	7.51e-72	1.15e-67	slit guidance ligand 2 [Source:MGI Symbol;Acc:MGI:1315205]
336	0	Bmp1	0.484772	0.499	0.109	2.62e-71	4.02e-67	bone morphogenetic protein 1 [Source:MGI Symbol;Acc:MGI:88176]
337	0	Fam114a1	0.511115	0.515	0.123	2.82e-71	4.34e-67	family with sequence similarity 114, member A1 [Source:MGI Symbol;Acc:MGI:1915553]
338	0	Oat	0.616064	0.843	0.42	5.18e-71	7.96e-67	ornithine aminotransferase [Source:MGI Symbol;Acc:MGI:97394]
339	0	Tcf21	0.533668	0.416	0.07	5.89e-71	9.05e-67	transcription factor 21 [Source:MGI Symbol;Acc:MGI:1202715]
340	0	Copz2	0.479502	0.562	0.155	7.06e-71	1.08e-66	coatomer protein complex, subunit zeta 2 [Source:MGI Symbol;Acc:MGI:1929008]
341	0	Twist1	0.438262	0.481	0.098	7.07e-71	1.09e-66	twist basic helix-loop-helix transcription factor 1 [Source:MGI Symbol;Acc:MGI:98872]
342	0	Ppib	0.554588	0.982	0.761	1.2e-70	1.84e-66	peptidylprolyl isomerase B [Source:MGI Symbol;Acc:MGI:97750]
343	0	Sh3d19	0.48451	0.447	0.089	1.63e-70	2.5e-66	SH3 domain protein D19 [Source:MGI Symbol;Acc:MGI:1350923]
344	0	Sash1	0.615717	0.776	0.327	1.76e-70	2.7e-66	SAM and SH3 domain containing 1 [Source:MGI Symbol;Acc:MGI:1917347]
345	0	Pdlim2	0.58338	0.676	0.233	2.62e-70	4.03e-66	PDZ and LIM domain 2 [Source:MGI Symbol;Acc:MGI:2384850]
346	0	Slc25a4	0.558287	0.957	0.61	3.12e-70	4.8e-66	solute carrier family 25 (mitochondrial carrier, adenine nucleotide translocator), member 4 [Source:MGI Symbol;Acc:MGI:1353495]
347	0	Angptl2	0.485391	0.477	0.1	4.04e-70	6.21e-66	angiopoietin-like 2 [Source:MGI Symbol;Acc:MGI:1347002]
348	0	Pam	0.502986	0.647	0.198	2.07e-69	3.19e-65	peptidylglycine alpha-amidating monooxygenase [Source:MGI Symbol;Acc:MGI:97475]
349	0	Smim1	0.396681	0.425	0.077	2.11e-69	3.24e-65	small integral membrane protein 1 [Source:MGI Symbol;Acc:MGI:1916109]
350	0	Gpc6	0.423168	0.454	0.086	2.32e-69	3.56e-65	glypican 6 [Source:MGI Symbol;Acc:MGI:1346322]
351	0	S1pr3	0.457867	0.407	0.071	2.28e-68	3.5e-64	sphingosine-1-phosphate receptor 3 [Source:MGI Symbol;Acc:MGI:1339365]
352	0	Ckap4	0.574619	0.638	0.218	2.6e-68	4e-64	cytoskeleton-associated protein 4 [Source:MGI Symbol;Acc:MGI:2444926]
353	0	Col4a5	0.525919	0.394	0.067	2.89e-68	4.44e-64	collagen, type IV, alpha 5 [Source:MGI Symbol;Acc:MGI:88456]
354	0	Slc10a6	0.453526	0.378	0.059	4.06e-68	6.24e-64	solute carrier family 10 (sodium/bile acid cotransporter family), member 6 [Source:MGI Symbol;Acc:MGI:1923000]
355	0	Pcdh19	0.542175	0.577	0.158	2.94e-67	4.52e-63	protocadherin 19 [Source:MGI Symbol;Acc:MGI:2685563]
356	0	Ahnak2	0.55814	0.57	0.154	3.66e-67	5.63e-63	AHNAK nucleoprotein 2 [Source:MGI Symbol;Acc:MGI:2144831]
357	0	Des	0.466593	0.436	0.086	9.75e-67	1.5e-62	desmin [Source:MGI Symbol;Acc:MGI:94885]
358	0	Eva1b	0.475277	0.655	0.208	2.67e-66	4.11e-62	eva-1 homolog B (C. elegans) [Source:MGI Symbol;Acc:MGI:1922063]
359	0	Slc1a5	0.475474	0.662	0.232	3.1e-66	4.76e-62	solute carrier family 1 (neutral amino acid transporter), member 5 [Source:MGI Symbol;Acc:MGI:105305]
360	0	Pla2r1	0.351152	0.371	0.059	4.2e-66	6.45e-62	phospholipase A2 receptor 1 [Source:MGI Symbol;Acc:MGI:102468]
361	0	Txn1	0.604207	0.957	0.71	5.73e-66	8.8e-62	thioredoxin 1 [Source:MGI Symbol;Acc:MGI:98874]
362	0	Egr1	0.626593	0.989	0.751	1.26e-65	1.94e-61	early growth response 1 [Source:MGI Symbol;Acc:MGI:95295]
363	0	Fkbp11	0.35436	0.291	0.029	1.41e-65	2.16e-61	FK506 binding protein 11 [Source:MGI Symbol;Acc:MGI:1913370]
364	0	Anxa1	0.530316	0.944	0.533	1.85e-65	2.84e-61	annexin A1 [Source:MGI Symbol;Acc:MGI:96819]
365	0	Fosb	0.781213	0.946	0.672	2.42e-65	3.72e-61	FBJ osteosarcoma oncogene B [Source:MGI Symbol;Acc:MGI:95575]
366	0	Gadd45g	0.774922	0.593	0.194	3.27e-65	5.02e-61	growth arrest and DNA-damage-inducible 45 gamma [Source:MGI Symbol;Acc:MGI:1346325]
367	0	Pkdcc	0.389878	0.474	0.107	4.27e-65	6.56e-61	protein kinase domain containing, cytoplasmic [Source:MGI Symbol;Acc:MGI:2147077]
368	0	Sox9	0.415494	0.289	0.028	5.09e-65	7.83e-61	SRY (sex determining region Y)-box 9 [Source:MGI Symbol;Acc:MGI:98371]
369	0	Map1lc3a	0.484019	0.814	0.365	1.2e-64	1.84e-60	microtubule-associated protein 1 light chain 3 alpha [Source:MGI Symbol;Acc:MGI:1915661]
370	0	2310022B05Rik	0.365929	0.396	0.073	1.24e-64	1.9e-60	RIKEN cDNA 2310022B05 gene [Source:MGI Symbol;Acc:MGI:1916801]
371	0	Nsg1	0.375745	0.369	0.059	2.28e-64	3.5e-60	neuron specific gene family member 1 [Source:MGI Symbol;Acc:MGI:109149]
372	0	Tnfaip2	0.816652	0.611	0.212	2.42e-64	3.72e-60	tumor necrosis factor, alpha-induced protein 2 [Source:MGI Symbol;Acc:MGI:104960]
373	0	Rora	0.406107	0.629	0.201	7.23e-64	1.11e-59	RAR-related orphan receptor alpha [Source:MGI Symbol;Acc:MGI:104661]
374	0	Tmem45a	0.307197	0.273	0.024	9.37e-64	1.44e-59	transmembrane protein 45a [Source:MGI Symbol;Acc:MGI:1913122]
375	0	Amotl1	0.437038	0.573	0.167	8.81e-63	1.35e-58	angiomotin-like 1 [Source:MGI Symbol;Acc:MGI:1922973]
376	0	Nop58	0.719085	0.698	0.298	2.18e-62	3.35e-58	NOP58 ribonucleoprotein [Source:MGI Symbol;Acc:MGI:1933184]
377	0	Cnpy2	0.516522	0.819	0.43	2.67e-62	4.11e-58	canopy FGF signaling regulator 2 [Source:MGI Symbol;Acc:MGI:1928477]
378	0	Klf4	0.72163	0.957	0.691	1.89e-61	2.9e-57	Kruppel-like factor 4 (gut) [Source:MGI Symbol;Acc:MGI:1342287]
379	0	Fam102b	0.545033	0.7	0.291	2.01e-61	3.09e-57	family with sequence similarity 102, member B [Source:MGI Symbol;Acc:MGI:3036259]
380	0	Itgbl1	0.433865	0.295	0.034	2.38e-61	3.66e-57	integrin, beta-like 1 [Source:MGI Symbol;Acc:MGI:2443439]
381	0	Phlda1	0.795648	0.77	0.356	5.69e-61	8.75e-57	pleckstrin homology like domain, family A, member 1 [Source:MGI Symbol;Acc:MGI:1096880]
382	0	Golim4	0.410996	0.573	0.173	2.47e-60	3.79e-56	golgi integral membrane protein 4 [Source:MGI Symbol;Acc:MGI:1920374]
383	0	Hoxc8	0.394474	0.385	0.075	5.49e-60	8.44e-56	homeobox C8 [Source:MGI Symbol;Acc:MGI:96198]
384	0	Tmem119	0.315123	0.289	0.032	5.84e-60	8.98e-56	transmembrane protein 119 [Source:MGI Symbol;Acc:MGI:2385228]
385	0	Igsf8	0.460317	0.564	0.179	1.56e-59	2.4e-55	immunoglobulin superfamily, member 8 [Source:MGI Symbol;Acc:MGI:2154090]
386	0	Hic1	0.411261	0.465	0.113	2.15e-59	3.3e-55	hypermethylated in cancer 1 [Source:MGI Symbol;Acc:MGI:1338010]
387	0	Aspa	0.365721	0.289	0.034	2.26e-59	3.47e-55	aspartoacylase [Source:MGI Symbol;Acc:MGI:87914]
388	0	Atp2b4	0.409797	0.553	0.16	2.31e-59	3.55e-55	ATPase, Ca++ transporting, plasma membrane 4 [Source:MGI Symbol;Acc:MGI:88111]
389	0	Fgl2	0.85322	0.55	0.174	2.78e-59	4.27e-55	fibrinogen-like protein 2 [Source:MGI Symbol;Acc:MGI:103266]
390	0	Tppp3	0.814393	0.752	0.34	3.49e-59	5.37e-55	tubulin polymerization-promoting protein family member 3 [Source:MGI Symbol;Acc:MGI:1915221]
391	0	Plekha5	0.346532	0.391	0.079	3.66e-59	5.63e-55	pleckstrin homology domain containing, family A member 5 [Source:MGI Symbol;Acc:MGI:1923802]
392	0	Emp2	0.339276	0.336	0.051	4.59e-59	7.06e-55	epithelial membrane protein 2 [Source:MGI Symbol;Acc:MGI:1098726]
393	0	Scrn1	0.349377	0.336	0.055	1.47e-58	2.26e-54	secernin 1 [Source:MGI Symbol;Acc:MGI:1917188]
394	0	Adm	0.4714	0.387	0.077	3.43e-58	5.28e-54	adrenomedullin [Source:MGI Symbol;Acc:MGI:108058]
395	0	Gpx7	0.41671	0.416	0.094	3.7e-58	5.69e-54	glutathione peroxidase 7 [Source:MGI Symbol;Acc:MGI:1914555]
396	0	Slc44a1	0.404255	0.566	0.178	1.26e-57	1.94e-53	solute carrier family 44, member 1 [Source:MGI Symbol;Acc:MGI:2140592]
397	0	Klhl13	0.353753	0.374	0.073	1.27e-57	1.96e-53	kelch-like 13 [Source:MGI Symbol;Acc:MGI:1914705]
398	0	Npdc1	0.396799	0.593	0.185	3.66e-57	5.62e-53	neural proliferation, differentiation and control 1 [Source:MGI Symbol;Acc:MGI:1099802]
399	0	Arf4	0.491531	0.922	0.593	4.77e-57	7.34e-53	ADP-ribosylation factor 4 [Source:MGI Symbol;Acc:MGI:99433]
400	0	Sec24d	0.399824	0.461	0.12	6.71e-57	1.03e-52	Sec24 related gene family, member D (S. cerevisiae) [Source:MGI Symbol;Acc:MGI:1916858]
401	0	Tcaf1	0.340398	0.412	0.091	8.66e-57	1.33e-52	TRPM8 channel-associated factor 1 [Source:MGI Symbol;Acc:MGI:1914665]
402	0	Cdc42ep5	0.339225	0.349	0.062	1.01e-56	1.56e-52	CDC42 effector protein (Rho GTPase binding) 5 [Source:MGI Symbol;Acc:MGI:1929745]
403	0	Phldb1	0.400465	0.49	0.137	1.09e-55	1.68e-51	pleckstrin homology like domain, family B, member 1 [Source:MGI Symbol;Acc:MGI:2143230]
404	0	C1qtnf2	0.331626	0.322	0.053	1.3e-55	2e-51	C1q and tumor necrosis factor related protein 2 [Source:MGI Symbol;Acc:MGI:1916433]
405	0	Arhgef25	0.333439	0.313	0.05	1.99e-55	3.05e-51	Rho guanine nucleotide exchange factor (GEF) 25 [Source:MGI Symbol;Acc:MGI:1277173]
406	0	Spry1	0.414741	0.515	0.139	2.64e-55	4.06e-51	sprouty RTK signaling antagonist 1 [Source:MGI Symbol;Acc:MGI:1345139]
407	0	Twsg1	0.335623	0.459	0.118	3.44e-55	5.29e-51	twisted gastrulation BMP signaling modulator 1 [Source:MGI Symbol;Acc:MGI:2137520]
408	0	Jun	0.634568	0.975	0.74	6.37e-55	9.79e-51	jun proto-oncogene [Source:MGI Symbol;Acc:MGI:96646]
409	0	Meis1	0.337173	0.304	0.046	7.35e-55	1.13e-50	Meis homeobox 1 [Source:MGI Symbol;Acc:MGI:104717]
410	0	Cdon	0.401525	0.4	0.088	1.32e-54	2.03e-50	cell adhesion molecule-related/down-regulated by oncogenes [Source:MGI Symbol;Acc:MGI:1926387]
411	0	Pmm1	0.366762	0.441	0.113	1.75e-54	2.69e-50	phosphomannomutase 1 [Source:MGI Symbol;Acc:MGI:1353418]
412	0	Auts2	0.400874	0.454	0.116	2.02e-54	3.11e-50	autism susceptibility candidate 2 [Source:MGI Symbol;Acc:MGI:1919847]
413	0	Gja1	0.446018	0.597	0.192	3.11e-54	4.78e-50	gap junction protein, alpha 1 [Source:MGI Symbol;Acc:MGI:95713]
414	0	Jade1	0.412004	0.499	0.144	3.51e-54	5.4e-50	jade family PHD finger 1 [Source:MGI Symbol;Acc:MGI:1925835]
415	0	Crtap	0.427303	0.494	0.149	3.82e-54	5.87e-50	cartilage associated protein [Source:MGI Symbol;Acc:MGI:1891221]
416	0	Vtn	0.434736	0.327	0.053	7.17e-54	1.1e-49	vitronectin [Source:MGI Symbol;Acc:MGI:98940]
417	0	Ifitm2	0.460969	0.989	0.784	7.33e-54	1.13e-49	interferon induced transmembrane protein 2 [Source:MGI Symbol;Acc:MGI:1933382]
418	0	Tfpi2	0.433075	0.253	0.028	9.9e-54	1.52e-49	tissue factor pathway inhibitor 2 [Source:MGI Symbol;Acc:MGI:108543]
419	0	Il6st	0.425576	0.743	0.323	9.97e-54	1.53e-49	interleukin 6 signal transducer [Source:MGI Symbol;Acc:MGI:96560]
420	0	Gaa	0.410056	0.485	0.144	1.28e-53	1.97e-49	glucosidase, alpha, acid [Source:MGI Symbol;Acc:MGI:95609]
421	0	Pnp	0.554783	0.906	0.56	1.49e-53	2.29e-49	purine-nucleoside phosphorylase [Source:MGI Symbol;Acc:MGI:97365]
422	0	Celf2	0.505191	0.877	0.506	1.78e-53	2.74e-49	CUGBP, Elav-like family member 2 [Source:MGI Symbol;Acc:MGI:1338822]
423	0	Phlda3	0.328672	0.468	0.127	2.19e-53	3.36e-49	pleckstrin homology like domain, family A, member 3 [Source:MGI Symbol;Acc:MGI:1351485]
424	0	Kdelr2	0.477663	0.696	0.31	2.75e-53	4.23e-49	KDEL (Lys-Asp-Glu-Leu) endoplasmic reticulum protein retention receptor 2 [Source:MGI Symbol;Acc:MGI:1914163]
425	0	Ltbp3	0.330378	0.425	0.103	2.77e-53	4.25e-49	latent transforming growth factor beta binding protein 3 [Source:MGI Symbol;Acc:MGI:1101355]
426	0	Slfn5	0.42728	0.781	0.338	3.88e-53	5.96e-49	schlafen 5 [Source:MGI Symbol;Acc:MGI:1329004]
427	0	Rhobtb3	0.273058	0.255	0.03	3.39e-52	5.21e-48	Rho-related BTB domain containing 3 [Source:MGI Symbol;Acc:MGI:1920546]
428	0	Tmem263	0.368137	0.407	0.097	3.86e-52	5.94e-48	transmembrane protein 263 [Source:MGI Symbol;Acc:MGI:2143652]
429	0	Zfpm2	0.314975	0.275	0.038	6.62e-52	1.02e-47	zinc finger protein, multitype 2 [Source:MGI Symbol;Acc:MGI:1334444]
430	0	P3h1	0.308728	0.3	0.049	6.96e-52	1.07e-47	prolyl 3-hydroxylase 1 [Source:MGI Symbol;Acc:MGI:1888921]
431	0	Thbd	0.754659	0.579	0.217	1.34e-51	2.06e-47	thrombomodulin [Source:MGI Symbol;Acc:MGI:98736]
432	0	Vasn	0.350202	0.447	0.115	1.37e-51	2.1e-47	vasorin [Source:MGI Symbol;Acc:MGI:2177651]
433	0	Ifitm3	0.452738	0.991	0.783	2.2e-51	3.38e-47	interferon induced transmembrane protein 3 [Source:MGI Symbol;Acc:MGI:1913391]
434	0	Abhd14a	0.325896	0.412	0.103	3.08e-51	4.73e-47	abhydrolase domain containing 14A [Source:MGI Symbol;Acc:MGI:1915894]
435	0	Camk2n1	0.388427	0.517	0.159	3.27e-51	5.03e-47	calcium/calmodulin-dependent protein kinase II inhibitor 1 [Source:MGI Symbol;Acc:MGI:1913509]
436	0	Sspn	0.351798	0.333	0.066	3.34e-51	5.13e-47	sarcospan [Source:MGI Symbol;Acc:MGI:1353511]
437	0	Lrpap1	0.439606	0.779	0.384	3.9e-51	6e-47	low density lipoprotein receptor-related protein associated protein 1 [Source:MGI Symbol;Acc:MGI:96829]
438	0	Flrt2	0.335555	0.485	0.135	5.76e-51	8.85e-47	fibronectin leucine rich transmembrane protein 2 [Source:MGI Symbol;Acc:MGI:3603594]
439	0	Eya2	0.303303	0.298	0.049	6.59e-51	1.01e-46	EYA transcriptional coactivator and phosphatase 2 [Source:MGI Symbol;Acc:MGI:109341]
440	0	C2	0.265137	0.295	0.044	7.64e-51	1.17e-46	complement component 2 (within H-2S) [Source:MGI Symbol;Acc:MGI:88226]
441	0	Thra	0.39821	0.673	0.273	1.01e-50	1.55e-46	thyroid hormone receptor alpha [Source:MGI Symbol;Acc:MGI:98742]
442	0	Ldhb	0.323318	0.394	0.091	1.15e-50	1.77e-46	lactate dehydrogenase B [Source:MGI Symbol;Acc:MGI:96763]
443	0	Adamts12	0.289724	0.253	0.032	1.66e-50	2.55e-46	a disintegrin-like and metallopeptidase (reprolysin type) with thrombospondin type 1 motif, 12 [Source:MGI Symbol;Acc:MGI:2146046]
444	0	Numbl	0.329191	0.347	0.074	1.73e-50	2.66e-46	numb-like [Source:MGI Symbol;Acc:MGI:894702]
445	0	Tmsb10	0.389648	0.982	0.693	4.38e-50	6.73e-46	thymosin, beta 10 [Source:MGI Symbol;Acc:MGI:109146]
446	0	Fndc1	0.33731	0.423	0.096	5.43e-50	8.34e-46	fibronectin type III domain containing 1 [Source:MGI Symbol;Acc:MGI:1915905]
447	0	Dram1	0.322668	0.358	0.077	5.45e-50	8.38e-46	DNA-damage regulated autophagy modulator 1 [Source:MGI Symbol;Acc:MGI:1918962]
448	0	Gm9780	0.29781	0.298	0.05	5.71e-50	8.77e-46	predicted gene 9780 [Source:MGI Symbol;Acc:MGI:3710532]
449	0	Amotl2	0.388285	0.494	0.15	6.32e-50	9.71e-46	angiomotin-like 2 [Source:MGI Symbol;Acc:MGI:1929286]
450	0	Add3	0.482896	0.837	0.445	6.94e-50	1.07e-45	adducin 3 (gamma) [Source:MGI Symbol;Acc:MGI:1351615]
451	0	Ryk	0.362812	0.575	0.201	1.04e-49	1.6e-45	receptor-like tyrosine kinase [Source:MGI Symbol;Acc:MGI:101766]
452	0	Emilin1	0.400402	0.407	0.104	1.14e-49	1.75e-45	elastin microfibril interfacer 1 [Source:MGI Symbol;Acc:MGI:1926189]
453	0	Rbfox2	0.346037	0.443	0.123	2.19e-49	3.36e-45	RNA binding protein, fox-1 homolog (C. elegans) 2 [Source:MGI Symbol;Acc:MGI:1933973]
454	0	Igf2r	0.363206	0.517	0.168	3.04e-49	4.67e-45	insulin-like growth factor 2 receptor [Source:MGI Symbol;Acc:MGI:96435]
455	0	Cdr2l	0.30232	0.295	0.05	5.18e-49	7.96e-45	cerebellar degeneration-related protein 2-like [Source:MGI Symbol;Acc:MGI:2684867]
456	0	Dlc1	0.332462	0.617	0.213	8.12e-49	1.25e-44	deleted in liver cancer 1 [Source:MGI Symbol;Acc:MGI:1354949]
457	0	Mmp11	0.448272	0.255	0.035	1.34e-48	2.06e-44	matrix metallopeptidase 11 [Source:MGI Symbol;Acc:MGI:97008]
458	0	Dap	0.418202	0.729	0.34	1.96e-48	3.01e-44	death-associated protein [Source:MGI Symbol;Acc:MGI:1918190]
459	0	Vgll3	0.333829	0.318	0.062	2.41e-48	3.71e-44	vestigial like family member 3 [Source:MGI Symbol;Acc:MGI:1920819]
460	0	Atxn10	0.387029	0.651	0.274	3.05e-48	4.69e-44	ataxin 10 [Source:MGI Symbol;Acc:MGI:1859293]
461	0	Arl1	0.44046	0.81	0.464	3.5e-48	5.37e-44	ADP-ribosylation factor-like 1 [Source:MGI Symbol;Acc:MGI:99436]
462	0	Layn	0.301608	0.266	0.04	3.7e-48	5.68e-44	layilin [Source:MGI Symbol;Acc:MGI:2685357]
463	0	Bdh2	0.267243	0.26	0.037	4.24e-48	6.52e-44	3-hydroxybutyrate dehydrogenase, type 2 [Source:MGI Symbol;Acc:MGI:1917022]
464	0	Fkbp14	0.321915	0.3	0.055	4.56e-48	7.01e-44	FK506 binding protein 14 [Source:MGI Symbol;Acc:MGI:2387639]
465	0	Ank2	0.274124	0.342	0.073	8.8e-48	1.35e-43	ankyrin 2, brain [Source:MGI Symbol;Acc:MGI:88025]
466	0	Vim	0.369041	1	0.924	1.24e-47	1.9e-43	vimentin [Source:MGI Symbol;Acc:MGI:98932]
467	0	Fmo2	0.493416	0.414	0.11	1.39e-47	2.13e-43	flavin containing monooxygenase 2 [Source:MGI Symbol;Acc:MGI:1916776]
468	0	Spry2	0.353533	0.38	0.09	1.4e-47	2.15e-43	sprouty RTK signaling antagonist 2 [Source:MGI Symbol;Acc:MGI:1345138]
469	0	Akap12	0.273366	0.671	0.237	1.71e-47	2.62e-43	A kinase (PRKA) anchor protein (gravin) 12 [Source:MGI Symbol;Acc:MGI:1932576]
470	0	Nr4a1	0.685198	0.877	0.582	1.72e-47	2.64e-43	nuclear receptor subfamily 4, group A, member 1 [Source:MGI Symbol;Acc:MGI:1352454]
471	0	Ptx3	0.728645	0.253	0.035	2.42e-47	3.71e-43	pentraxin related gene [Source:MGI Symbol;Acc:MGI:104641]
472	0	Sfr1	0.435493	0.908	0.604	3.14e-47	4.83e-43	SWI5 dependent recombination repair 1 [Source:MGI Symbol;Acc:MGI:1915038]
473	0	Rem1	0.367469	0.38	0.096	3.19e-47	4.9e-43	rad and gem related GTP binding protein 1 [Source:MGI Symbol;Acc:MGI:1097696]
474	0	Pcbp4	0.313404	0.329	0.07	7.63e-47	1.17e-42	poly(rC) binding protein 4 [Source:MGI Symbol;Acc:MGI:1890471]
475	0	Rbpms	0.378376	0.568	0.208	1.3e-46	2e-42	RNA binding protein gene with multiple splicing [Source:MGI Symbol;Acc:MGI:1334446]
476	0	Palm	0.284981	0.416	0.112	1.34e-46	2.06e-42	paralemmin [Source:MGI Symbol;Acc:MGI:1261814]
477	0	Aga	0.358912	0.454	0.139	1.41e-46	2.17e-42	aspartylglucosaminidase [Source:MGI Symbol;Acc:MGI:104873]
478	0	Casc4	0.296341	0.304	0.057	2.17e-46	3.33e-42	cancer susceptibility candidate 4 [Source:MGI Symbol;Acc:MGI:2443129]
479	0	Pamr1	0.365346	0.36	0.081	2.27e-46	3.49e-42	peptidase domain containing associated with muscle regeneration 1 [Source:MGI Symbol;Acc:MGI:2445082]
480	0	Ift27	0.350956	0.485	0.161	2.43e-46	3.74e-42	intraflagellar transport 27 [Source:MGI Symbol;Acc:MGI:1914292]
481	0	Fam129a	0.475451	0.734	0.356	3.89e-46	5.97e-42	family with sequence similarity 129, member A [Source:MGI Symbol;Acc:MGI:2137237]
482	0	Bag3	0.470359	0.635	0.278	4.19e-46	6.43e-42	BCL2-associated athanogene 3 [Source:MGI Symbol;Acc:MGI:1352493]
483	0	Runx1t1	0.320502	0.302	0.058	4.28e-46	6.57e-42	RUNX1 translocation partner 1 [Source:MGI Symbol;Acc:MGI:104793]
484	0	Arhgap21	0.356879	0.456	0.142	5.48e-46	8.43e-42	Rho GTPase activating protein 21 [Source:MGI Symbol;Acc:MGI:1918685]
485	0	Tiparp	0.666901	0.752	0.408	5.87e-46	9.01e-42	TCDD-inducible poly(ADP-ribose) polymerase [Source:MGI Symbol;Acc:MGI:2159210]
486	0	S100a10	0.4051	0.987	0.851	6.14e-46	9.43e-42	S100 calcium binding protein A10 (calpactin) [Source:MGI Symbol;Acc:MGI:1339468]
487	0	Sec31a	0.400709	0.66	0.301	6.15e-46	9.45e-42	Sec31 homolog A (S. cerevisiae) [Source:MGI Symbol;Acc:MGI:1916412]
488	0	Zbtb16	0.307225	0.374	0.092	6.77e-46	1.04e-41	zinc finger and BTB domain containing 16 [Source:MGI Symbol;Acc:MGI:103222]
489	0	Grb10	0.388851	0.409	0.115	6.95e-46	1.07e-41	growth factor receptor bound protein 10 [Source:MGI Symbol;Acc:MGI:103232]
490	0	Ntn1	0.358589	0.34	0.077	7.08e-46	1.09e-41	netrin 1 [Source:MGI Symbol;Acc:MGI:105088]
491	0	Tceal8	0.394952	0.647	0.275	1.5e-45	2.31e-41	transcription elongation factor A (SII)-like 8 [Source:MGI Symbol;Acc:MGI:1913934]
492	0	Rtn1	0.31628	0.338	0.076	2.2e-45	3.37e-41	reticulon 1 [Source:MGI Symbol;Acc:MGI:1933947]
493	0	Kcnq1ot1	0.523622	0.705	0.336	2.43e-45	3.74e-41	KCNQ1 overlapping transcript 1 [Source:MGI Symbol;Acc:MGI:1926855]
494	0	Fam92a	0.303219	0.432	0.124	2.54e-45	3.9e-41	family with sequence similarity 92, member A [Source:MGI Symbol;Acc:MGI:1915349]
495	0	Tfpi	0.321902	0.369	0.094	2.65e-45	4.07e-41	tissue factor pathway inhibitor [Source:MGI Symbol;Acc:MGI:1095418]
496	0	Hacd1	0.323407	0.374	0.097	3.48e-45	5.35e-41	3-hydroxyacyl-CoA dehydratase 1 [Source:MGI Symbol;Acc:MGI:1353592]
497	0	Pcdh18	0.303917	0.26	0.042	4.17e-45	6.41e-41	protocadherin 18 [Source:MGI Symbol;Acc:MGI:1920423]
498	0	Hp	0.864103	0.447	0.142	4.2e-45	6.46e-41	haptoglobin [Source:MGI Symbol;Acc:MGI:96211]
499	0	Gata6	0.354991	0.304	0.059	4.28e-45	6.58e-41	GATA binding protein 6 [Source:MGI Symbol;Acc:MGI:107516]
500	0	Cyp27a1	0.414204	0.483	0.164	9.07e-45	1.39e-40	cytochrome P450, family 27, subfamily a, polypeptide 1 [Source:MGI Symbol;Acc:MGI:88594]
501	0	Plpp1	0.368787	0.508	0.166	9.82e-45	1.51e-40	phospholipid phosphatase 1 [Source:MGI Symbol;Acc:MGI:108412]
502	0	Cyp20a1	0.39595	0.515	0.19	1.44e-44	2.21e-40	cytochrome P450, family 20, subfamily a, polypeptide 1 [Source:MGI Symbol;Acc:MGI:1925201]
503	0	Calml4	0.324661	0.412	0.115	1.6e-44	2.46e-40	calmodulin-like 4 [Source:MGI Symbol;Acc:MGI:1922850]
504	0	Col14a1	0.304275	0.427	0.108	1.82e-44	2.8e-40	collagen, type XIV, alpha 1 [Source:MGI Symbol;Acc:MGI:1341272]
505	0	Atp2a2	0.423577	0.729	0.37	2.03e-44	3.12e-40	ATPase, Ca++ transporting, cardiac muscle, slow twitch 2 [Source:MGI Symbol;Acc:MGI:88110]
506	0	Tusc3	0.332094	0.53	0.193	2.83e-44	4.35e-40	tumor suppressor candidate 3 [Source:MGI Symbol;Acc:MGI:1933134]
507	0	Galnt15	0.389324	0.483	0.154	2.92e-44	4.48e-40	polypeptide N-acetylgalactosaminyltransferase 15 [Source:MGI Symbol;Acc:MGI:1926004]
508	0	Ube2e2	0.265249	0.353	0.088	3.07e-44	4.72e-40	ubiquitin-conjugating enzyme E2E 2 [Source:MGI Symbol;Acc:MGI:2384997]
509	0	Dag1	0.396183	0.622	0.261	3.49e-44	5.37e-40	dystroglycan 1 [Source:MGI Symbol;Acc:MGI:101864]
510	0	Enc1	0.582862	0.387	0.106	4.08e-44	6.26e-40	ectodermal-neural cortex 1 [Source:MGI Symbol;Acc:MGI:109610]
511	0	Mmp19	0.301824	0.365	0.09	4.78e-44	7.34e-40	matrix metallopeptidase 19 [Source:MGI Symbol;Acc:MGI:1927899]
512	0	Camk2d	0.390861	0.64	0.277	6.44e-44	9.89e-40	calcium/calmodulin-dependent protein kinase II, delta [Source:MGI Symbol;Acc:MGI:1341265]
513	0	S100a1	0.442797	0.776	0.442	9.06e-44	1.39e-39	S100 calcium binding protein A1 [Source:MGI Symbol;Acc:MGI:1338917]
514	0	Fat1	0.284986	0.273	0.049	1.47e-43	2.26e-39	FAT atypical cadherin 1 [Source:MGI Symbol;Acc:MGI:109168]
515	0	Itgb5	0.3222	0.606	0.234	2.01e-43	3.09e-39	integrin beta 5 [Source:MGI Symbol;Acc:MGI:96614]
516	0	Lpl	0.417349	0.922	0.563	2.41e-43	3.7e-39	lipoprotein lipase [Source:MGI Symbol;Acc:MGI:96820]
517	0	B4galt1	0.328284	0.488	0.165	3.14e-43	4.83e-39	UDP-Gal:betaGlcNAc beta 1,4- galactosyltransferase, polypeptide 1 [Source:MGI Symbol;Acc:MGI:95705]
518	0	Pxdn	0.296807	0.477	0.148	3.22e-43	4.94e-39	peroxidasin [Source:MGI Symbol;Acc:MGI:1916925]
519	0	Hdlbp	0.456911	0.821	0.499	3.97e-43	6.1e-39	high density lipoprotein (HDL) binding protein [Source:MGI Symbol;Acc:MGI:99256]
520	0	Cebpb	0.711839	0.922	0.637	4.63e-43	7.12e-39	CCAAT/enhancer binding protein (C/EBP), beta [Source:MGI Symbol;Acc:MGI:88373]
521	0	Cxcl12	0.265164	0.776	0.333	4.73e-43	7.27e-39	chemokine (C-X-C motif) ligand 12 [Source:MGI Symbol;Acc:MGI:103556]
522	0	Dact1	0.271452	0.414	0.11	6.85e-43	1.05e-38	dishevelled-binding antagonist of beta-catenin 1 [Source:MGI Symbol;Acc:MGI:1891740]
523	0	Tcf7l1	0.295977	0.389	0.106	6.97e-43	1.07e-38	transcription factor 7 like 1 (T cell specific, HMG box) [Source:MGI Symbol;Acc:MGI:1202876]
524	0	Slc29a1	0.426877	0.638	0.294	8.26e-43	1.27e-38	solute carrier family 29 (nucleoside transporters), member 1 [Source:MGI Symbol;Acc:MGI:1927073]
525	0	Copb2	0.386626	0.767	0.408	1.17e-42	1.79e-38	coatomer protein complex, subunit beta 2 (beta prime) [Source:MGI Symbol;Acc:MGI:1354962]
526	0	S100a11	0.314367	0.969	0.656	1.5e-42	2.31e-38	S100 calcium binding protein A11 [Source:MGI Symbol;Acc:MGI:1338798]
527	0	Ndrg2	0.266009	0.358	0.088	1.7e-42	2.61e-38	N-myc downstream regulated gene 2 [Source:MGI Symbol;Acc:MGI:1352498]
528	0	Anxa5	0.406109	0.971	0.809	1.98e-42	3.05e-38	annexin A5 [Source:MGI Symbol;Acc:MGI:106008]
529	0	Gulp1	0.317399	0.306	0.068	2.47e-42	3.8e-38	GULP, engulfment adaptor PTB domain containing 1 [Source:MGI Symbol;Acc:MGI:1920407]
530	0	Ptgs2	0.851567	0.414	0.125	2.92e-42	4.49e-38	prostaglandin-endoperoxide synthase 2 [Source:MGI Symbol;Acc:MGI:97798]
531	0	Dcun1d3	0.262642	0.306	0.067	6.35e-42	9.75e-38	DCN1, defective in cullin neddylation 1, domain containing 3 (S. cerevisiae) [Source:MGI Symbol;Acc:MGI:2679003]
532	0	Tpst1	0.330536	0.606	0.241	7.32e-42	1.12e-37	protein-tyrosine sulfotransferase 1 [Source:MGI Symbol;Acc:MGI:1298231]
533	0	Dbn1	0.283956	0.445	0.131	1.05e-41	1.61e-37	drebrin 1 [Source:MGI Symbol;Acc:MGI:1931838]
534	0	Qpct	0.321994	0.591	0.221	1.11e-41	1.7e-37	glutaminyl-peptide cyclotransferase (glutaminyl cyclase) [Source:MGI Symbol;Acc:MGI:1917786]
535	0	Cbr3	0.325076	0.398	0.118	1.26e-41	1.94e-37	carbonyl reductase 3 [Source:MGI Symbol;Acc:MGI:1309992]
536	0	Enpp5	0.262591	0.311	0.069	2.91e-41	4.47e-37	ectonucleotide pyrophosphatase/phosphodiesterase 5 [Source:MGI Symbol;Acc:MGI:1933830]
537	0	Rhou	0.272326	0.318	0.072	4.16e-41	6.39e-37	ras homolog family member U [Source:MGI Symbol;Acc:MGI:1916831]
538	0	Mettl1	0.32302	0.383	0.108	4.79e-41	7.36e-37	methyltransferase like 1 [Source:MGI Symbol;Acc:MGI:1339986]
539	0	Tmem159	0.326737	0.481	0.174	5.45e-41	8.38e-37	transmembrane protein 159 [Source:MGI Symbol;Acc:MGI:1925752]
540	0	Wnt5a	0.276408	0.298	0.063	6.51e-41	1e-36	wingless-type MMTV integration site family, member 5A [Source:MGI Symbol;Acc:MGI:98958]
541	0	Ugp2	0.349783	0.649	0.288	8.81e-41	1.35e-36	UDP-glucose pyrophosphorylase 2 [Source:MGI Symbol;Acc:MGI:2183447]
542	0	Hk2	0.533625	0.396	0.124	9.87e-41	1.52e-36	hexokinase 2 [Source:MGI Symbol;Acc:MGI:1315197]
543	0	Tbrg1	0.3631	0.729	0.377	1.01e-40	1.55e-36	transforming growth factor beta regulated gene 1 [Source:MGI Symbol;Acc:MGI:1100877]
544	0	Nr2f2	0.358774	0.374	0.102	1.13e-40	1.74e-36	nuclear receptor subfamily 2, group F, member 2 [Source:MGI Symbol;Acc:MGI:1352452]
545	0	Cacna2d1	0.269847	0.262	0.049	1.24e-40	1.91e-36	calcium channel, voltage-dependent, alpha2/delta subunit 1 [Source:MGI Symbol;Acc:MGI:88295]
546	0	Lix1l	0.312186	0.383	0.113	1.3e-40	2e-36	Lix1-like [Source:MGI Symbol;Acc:MGI:3036267]
547	0	Lamp2	0.390848	0.94	0.637	1.3e-40	2e-36	lysosomal-associated membrane protein 2 [Source:MGI Symbol;Acc:MGI:96748]
548	0	Ahcyl1	0.361254	0.523	0.204	1.89e-40	2.91e-36	S-adenosylhomocysteine hydrolase-like 1 [Source:MGI Symbol;Acc:MGI:2385184]
549	0	Krtcap2	0.374614	0.89	0.58	2.49e-40	3.83e-36	keratinocyte associated protein 2 [Source:MGI Symbol;Acc:MGI:1913309]
550	0	Hs3st1	0.385092	0.295	0.064	3.26e-40	5.02e-36	heparan sulfate (glucosamine) 3-O-sulfotransferase 1 [Source:MGI Symbol;Acc:MGI:1201606]
551	0	Sar1a	0.401622	0.758	0.411	4.11e-40	6.32e-36	secretion associated Ras related GTPase 1A [Source:MGI Symbol;Acc:MGI:98230]
552	0	Prdx4	0.410506	0.743	0.389	4.12e-40	6.33e-36	peroxiredoxin 4 [Source:MGI Symbol;Acc:MGI:1859815]
553	0	Pgm3	0.301174	0.371	0.106	4.26e-40	6.55e-36	phosphoglucomutase 3 [Source:MGI Symbol;Acc:MGI:97566]
554	0	Gm12840	0.595406	0.367	0.106	5.17e-40	7.94e-36	predicted gene 12840 [Source:MGI Symbol;Acc:MGI:3650917]
555	0	Gk5	0.287945	0.257	0.049	9.15e-40	1.41e-35	glycerol kinase 5 (putative) [Source:MGI Symbol;Acc:MGI:2443336]
556	0	Slc6a8	0.262297	0.347	0.089	1.13e-39	1.74e-35	solute carrier family 6 (neurotransmitter transporter, creatine), member 8 [Source:MGI Symbol;Acc:MGI:2147834]
557	0	Drap1	0.383294	0.87	0.557	1.39e-39	2.14e-35	Dr1 associated protein 1 (negative cofactor 2 alpha) [Source:MGI Symbol;Acc:MGI:1913806]
558	0	Klhdc2	0.29199	0.501	0.19	1.98e-39	3.04e-35	kelch domain containing 2 [Source:MGI Symbol;Acc:MGI:1916804]
559	0	Morf4l2	0.385957	0.732	0.382	2.85e-39	4.37e-35	mortality factor 4 like 2 [Source:MGI Symbol;Acc:MGI:1927167]
560	0	St5	0.278178	0.289	0.062	3.41e-39	5.24e-35	suppression of tumorigenicity 5 [Source:MGI Symbol;Acc:MGI:108517]
561	0	Dapk1	0.309058	0.499	0.185	5.4e-39	8.29e-35	death associated protein kinase 1 [Source:MGI Symbol;Acc:MGI:1916885]
562	0	Uap1	0.469459	0.615	0.28	5.42e-39	8.33e-35	UDP-N-acetylglucosamine pyrophosphorylase 1 [Source:MGI Symbol;Acc:MGI:1334459]
563	0	Ostc	0.429314	0.81	0.482	6.24e-39	9.59e-35	oligosaccharyltransferase complex subunit (non-catalytic) [Source:MGI Symbol;Acc:MGI:1913607]
564	0	Sec11a	0.345927	0.792	0.439	7.04e-39	1.08e-34	SEC11 homolog A, signal peptidase complex subunit [Source:MGI Symbol;Acc:MGI:1929464]
565	0	Nrip1	0.430629	0.649	0.313	7.29e-39	1.12e-34	nuclear receptor interacting protein 1 [Source:MGI Symbol;Acc:MGI:1315213]
566	0	Eprs	0.545162	0.765	0.435	1.04e-38	1.6e-34	glutamyl-prolyl-tRNA synthetase [Source:MGI Symbol;Acc:MGI:97838]
567	0	Mpdz	0.275701	0.378	0.111	1.09e-38	1.68e-34	multiple PDZ domain protein [Source:MGI Symbol;Acc:MGI:1343489]
568	0	P4ha1	0.329085	0.519	0.208	1.17e-38	1.79e-34	procollagen-proline, 2-oxoglutarate 4-dioxygenase (proline 4-hydroxylase), alpha 1 polypeptide [Source:MGI Symbol;Acc:MGI:97463]
569	0	Srgap1	0.284454	0.32	0.078	1.17e-38	1.8e-34	SLIT-ROBO Rho GTPase activating protein 1 [Source:MGI Symbol;Acc:MGI:2152936]
570	0	Zcchc24	0.346534	0.606	0.26	1.62e-38	2.49e-34	zinc finger, CCHC domain containing 24 [Source:MGI Symbol;Acc:MGI:1919168]
571	0	Junb	0.422074	0.98	0.928	2.15e-38	3.3e-34	jun B proto-oncogene [Source:MGI Symbol;Acc:MGI:96647]
572	0	Adk	0.265996	0.434	0.146	2.4e-38	3.7e-34	adenosine kinase [Source:MGI Symbol;Acc:MGI:87930]
573	0	Nfic	0.390123	0.776	0.416	2.86e-38	4.39e-34	nuclear factor I/C [Source:MGI Symbol;Acc:MGI:109591]
574	0	Ybx3	0.336192	0.814	0.435	3.44e-38	5.29e-34	Y box protein 3 [Source:MGI Symbol;Acc:MGI:2137670]
575	0	Dtnbp1	0.323307	0.689	0.331	3.91e-38	6e-34	dystrobrevin binding protein 1 [Source:MGI Symbol;Acc:MGI:2137586]
576	0	Lpp	0.384861	0.626	0.285	5.39e-38	8.29e-34	LIM domain containing preferred translocation partner in lipoma [Source:MGI Symbol;Acc:MGI:2441849]
577	0	Mageh1	0.298614	0.32	0.082	8.03e-38	1.23e-33	melanoma antigen, family H, 1 [Source:MGI Symbol;Acc:MGI:1922875]
578	0	Trip6	0.258926	0.34	0.094	8.86e-38	1.36e-33	thyroid hormone receptor interactor 6 [Source:MGI Symbol;Acc:MGI:1343458]
579	0	Arl3	0.317971	0.548	0.228	1.45e-37	2.24e-33	ADP-ribosylation factor-like 3 [Source:MGI Symbol;Acc:MGI:1929699]
580	0	Ssr2	0.424673	0.673	0.353	2.94e-37	4.51e-33	signal sequence receptor, beta [Source:MGI Symbol;Acc:MGI:1913506]
581	0	Iah1	0.344007	0.615	0.286	3.1e-37	4.76e-33	isoamyl acetate-hydrolyzing esterase 1 homolog [Source:MGI Symbol;Acc:MGI:1914982]
582	0	Kdelr1	0.386127	0.711	0.358	3.48e-37	5.35e-33	KDEL (Lys-Asp-Glu-Leu) endoplasmic reticulum protein retention receptor 1 [Source:MGI Symbol;Acc:MGI:1915387]
583	0	Slco3a1	0.285185	0.414	0.129	4.35e-37	6.68e-33	solute carrier organic anion transporter family, member 3a1 [Source:MGI Symbol;Acc:MGI:1351867]
584	0	Enpep	0.301485	0.418	0.136	8.1e-37	1.24e-32	glutamyl aminopeptidase [Source:MGI Symbol;Acc:MGI:106645]
585	0	Lman1	0.366388	0.667	0.332	1.03e-36	1.59e-32	lectin, mannose-binding, 1 [Source:MGI Symbol;Acc:MGI:1917611]
586	0	Aldoa	0.264524	0.922	0.648	1.27e-36	1.96e-32	aldolase A, fructose-bisphosphate [Source:MGI Symbol;Acc:MGI:87994]
587	0	Xbp1	0.370176	0.803	0.476	1.29e-36	1.97e-32	X-box binding protein 1 [Source:MGI Symbol;Acc:MGI:98970]
588	0	Trip10	0.301387	0.463	0.165	1.35e-36	2.08e-32	thyroid hormone receptor interactor 10 [Source:MGI Symbol;Acc:MGI:2146901]
589	0	Tns2	0.294733	0.481	0.175	1.51e-36	2.32e-32	tensin 2 [Source:MGI Symbol;Acc:MGI:2387586]
590	0	Hmgn1	0.341628	0.837	0.489	1.72e-36	2.64e-32	high mobility group nucleosomal binding domain 1 [Source:MGI Symbol;Acc:MGI:96120]
591	0	Pdlim7	0.314075	0.351	0.106	1.92e-36	2.95e-32	PDZ and LIM domain 7 [Source:MGI Symbol;Acc:MGI:1914649]
592	0	Dsel	0.29684	0.353	0.102	2.14e-36	3.29e-32	dermatan sulfate epimerase-like [Source:MGI Symbol;Acc:MGI:2442948]
593	0	Fgfr1	0.315349	0.779	0.383	2.22e-36	3.41e-32	fibroblast growth factor receptor 1 [Source:MGI Symbol;Acc:MGI:95522]
594	0	Mtch1	0.342875	0.846	0.536	2.68e-36	4.12e-32	mitochondrial carrier 1 [Source:MGI Symbol;Acc:MGI:1929261]
595	0	Pten	0.35393	0.794	0.464	2.8e-36	4.3e-32	phosphatase and tensin homolog [Source:MGI Symbol;Acc:MGI:109583]
596	0	Tspan3	0.307067	0.687	0.344	2.99e-36	4.59e-32	tetraspanin 3 [Source:MGI Symbol;Acc:MGI:1928098]
597	0	Serpine1	0.533711	0.342	0.102	3.69e-36	5.67e-32	serine (or cysteine) peptidase inhibitor, clade E, member 1 [Source:MGI Symbol;Acc:MGI:97608]
598	0	Pmp22	0.360642	0.866	0.46	3.8e-36	5.84e-32	peripheral myelin protein 22 [Source:MGI Symbol;Acc:MGI:97631]
599	0	Bmyc	0.545907	0.55	0.252	3.86e-36	5.94e-32	brain expressed myelocytomatosis oncogene [Source:MGI Symbol;Acc:MGI:88184]
600	0	Acadsb	0.301343	0.425	0.15	6.57e-36	1.01e-31	acyl-Coenzyme A dehydrogenase, short/branched chain [Source:MGI Symbol;Acc:MGI:1914135]
601	0	Pde3a	0.26991	0.293	0.071	8.79e-36	1.35e-31	phosphodiesterase 3A, cGMP inhibited [Source:MGI Symbol;Acc:MGI:1860764]
602	0	Cbx6	0.271229	0.425	0.144	1.42e-35	2.18e-31	chromobox 6 [Source:MGI Symbol;Acc:MGI:3512628]
603	0	Postn	0.436604	0.391	0.119	1.82e-35	2.79e-31	periostin, osteoblast specific factor [Source:MGI Symbol;Acc:MGI:1926321]
604	0	Ttc28	0.303062	0.515	0.198	2.5e-35	3.84e-31	tetratricopeptide repeat domain 28 [Source:MGI Symbol;Acc:MGI:2140873]
605	0	Esyt2	0.279082	0.481	0.185	3.13e-35	4.8e-31	extended synaptotagmin-like protein 2 [Source:MGI Symbol;Acc:MGI:1261845]
606	0	Fam124a	0.291069	0.255	0.056	3.5e-35	5.37e-31	family with sequence similarity 124, member A [Source:MGI Symbol;Acc:MGI:3645930]
607	0	2022-09-08	0.288057	0.555	0.237	4.64e-35	7.13e-31	septin 8 [Source:MGI Symbol;Acc:MGI:894310]
608	0	Pofut2	0.32879	0.443	0.164	6.2e-35	9.52e-31	protein O-fucosyltransferase 2 [Source:MGI Symbol;Acc:MGI:1916863]
609	0	Airn	0.291066	0.3	0.077	1.02e-34	1.57e-30	antisense Igf2r RNA [Source:MGI Symbol;Acc:MGI:1353471]
610	0	Aspn	0.297291	0.362	0.102	1.34e-34	2.06e-30	asporin [Source:MGI Symbol;Acc:MGI:1913945]
611	0	Dennd2a	0.258026	0.282	0.069	1.72e-34	2.65e-30	DENN/MADD domain containing 2A [Source:MGI Symbol;Acc:MGI:2444961]
612	0	Tmem106b	0.286797	0.528	0.224	2.02e-34	3.1e-30	transmembrane protein 106B [Source:MGI Symbol;Acc:MGI:1919150]
613	0	Carhsp1	0.31495	0.577	0.254	2.23e-34	3.43e-30	calcium regulated heat stable protein 1 [Source:MGI Symbol;Acc:MGI:1196368]
614	0	Rhoq	0.263412	0.512	0.198	2.34e-34	3.59e-30	ras homolog family member Q [Source:MGI Symbol;Acc:MGI:1931553]
615	0	Zeb1	0.328761	0.548	0.23	2.96e-34	4.54e-30	zinc finger E-box binding homeobox 1 [Source:MGI Symbol;Acc:MGI:1344313]
616	0	Fmo1	0.274235	0.407	0.133	5.74e-34	8.83e-30	flavin containing monooxygenase 1 [Source:MGI Symbol;Acc:MGI:1310002]
617	0	Mbd1	0.596276	0.342	0.109	6.01e-34	9.24e-30	methyl-CpG binding domain protein 1 [Source:MGI Symbol;Acc:MGI:1333811]
618	0	Procr	0.351219	0.322	0.088	9.43e-34	1.45e-29	protein C receptor, endothelial [Source:MGI Symbol;Acc:MGI:104596]
619	0	Tm7sf3	0.288456	0.385	0.129	1.32e-33	2.02e-29	transmembrane 7 superfamily member 3 [Source:MGI Symbol;Acc:MGI:1914873]
620	0	Ptp4a1	0.340277	0.662	0.333	2.05e-33	3.15e-29	protein tyrosine phosphatase 4a1 [Source:MGI Symbol;Acc:MGI:1277096]
621	0	Ptov1	0.344062	0.638	0.317	2.51e-33	3.85e-29	prostate tumor over expressed gene 1 [Source:MGI Symbol;Acc:MGI:1933946]
622	0	Nucb1	0.340448	0.705	0.391	3.74e-33	5.74e-29	nucleobindin 1 [Source:MGI Symbol;Acc:MGI:97388]
623	0	Ddost	0.361145	0.718	0.413	5.51e-33	8.47e-29	dolichyl-di-phosphooligosaccharide-protein glycotransferase [Source:MGI Symbol;Acc:MGI:1194508]
624	0	Slc39a7	0.294299	0.55	0.241	6.39e-33	9.82e-29	solute carrier family 39 (zinc transporter), member 7 [Source:MGI Symbol;Acc:MGI:95909]
625	0	Fundc2	0.335469	0.705	0.384	9.95e-33	1.53e-28	FUN14 domain containing 2 [Source:MGI Symbol;Acc:MGI:1914641]
626	0	Sh3pxd2b	0.321215	0.447	0.175	1.12e-32	1.72e-28	SH3 and PX domains 2B [Source:MGI Symbol;Acc:MGI:2442062]
627	0	Pura	0.315826	0.81	0.49	1.57e-32	2.41e-28	purine rich element binding protein A [Source:MGI Symbol;Acc:MGI:103079]
628	0	Rhoc	0.271322	0.826	0.439	1.92e-32	2.95e-28	ras homolog family member C [Source:MGI Symbol;Acc:MGI:106028]
629	0	Atp8b1	0.257685	0.253	0.059	3.22e-32	4.95e-28	ATPase, class I, type 8B, member 1 [Source:MGI Symbol;Acc:MGI:1859665]
630	0	Yipf5	0.297113	0.456	0.179	7.14e-32	1.1e-27	Yip1 domain family, member 5 [Source:MGI Symbol;Acc:MGI:1914430]
631	0	Rras	0.300994	0.736	0.398	1.58e-31	2.43e-27	related RAS viral (r-ras) oncogene [Source:MGI Symbol;Acc:MGI:98179]
632	0	Snx18	0.331821	0.512	0.222	1.74e-31	2.68e-27	sorting nexin 18 [Source:MGI Symbol;Acc:MGI:2137642]
633	0	Yipf3	0.275917	0.593	0.282	1.82e-31	2.8e-27	Yip1 domain family, member 3 [Source:MGI Symbol;Acc:MGI:106280]
634	0	Pkd2	0.292065	0.43	0.161	2.46e-31	3.79e-27	polycystin 2, transient receptor potential cation channel [Source:MGI Symbol;Acc:MGI:1099818]
635	0	Sec22b	0.265822	0.497	0.208	2.86e-31	4.39e-27	SEC22 homolog B, vesicle trafficking protein [Source:MGI Symbol;Acc:MGI:1338759]
636	0	Dnajc25	0.282093	0.425	0.159	2.88e-31	4.42e-27	DnaJ heat shock protein family (Hsp40) member C25 [Source:MGI Symbol;Acc:MGI:1919679]
637	0	Nucb2	0.319748	0.544	0.249	2.91e-31	4.47e-27	nucleobindin 2 [Source:MGI Symbol;Acc:MGI:1858179]
638	0	Dhrs7	0.274728	0.64	0.325	5.05e-31	7.76e-27	dehydrogenase/reductase (SDR family) member 7 [Source:MGI Symbol;Acc:MGI:1913625]
639	0	Cdk8	0.279856	0.369	0.129	5.66e-31	8.7e-27	cyclin-dependent kinase 8 [Source:MGI Symbol;Acc:MGI:1196224]
640	0	Igf1	0.763667	0.707	0.37	7.83e-31	1.2e-26	insulin-like growth factor 1 [Source:MGI Symbol;Acc:MGI:96432]
641	0	Tsen34	0.265526	0.559	0.251	9.04e-31	1.39e-26	tRNA splicing endonuclease subunit 34 [Source:MGI Symbol;Acc:MGI:1913328]
642	0	Atraid	0.326824	0.776	0.45	1.15e-30	1.77e-26	all-trans retinoic acid induced differentiation factor [Source:MGI Symbol;Acc:MGI:1918918]
643	0	Rrbp1	0.356847	0.964	0.733	1.33e-30	2.05e-26	ribosome binding protein 1 [Source:MGI Symbol;Acc:MGI:1932395]
644	0	Pmepa1	0.358676	0.454	0.187	1.61e-30	2.48e-26	prostate transmembrane protein, androgen induced 1 [Source:MGI Symbol;Acc:MGI:1929600]
645	0	Rpl22l1	0.293077	0.964	0.747	2.81e-30	4.32e-26	ribosomal protein L22 like 1 [Source:MGI Symbol;Acc:MGI:1915278]
646	0	Slc50a1	0.277635	0.653	0.328	2.9e-30	4.45e-26	solute carrier family 50 (sugar transporter), member 1 [Source:MGI Symbol;Acc:MGI:107417]
647	0	Rbbp7	0.343855	0.609	0.299	3.41e-30	5.23e-26	retinoblastoma binding protein 7, chromatin remodeling factor [Source:MGI Symbol;Acc:MGI:1194910]
648	0	Scarb2	0.366165	0.664	0.362	3.44e-30	5.29e-26	scavenger receptor class B, member 2 [Source:MGI Symbol;Acc:MGI:1196458]
649	0	Fuca1	0.405022	0.801	0.515	3.92e-30	6.03e-26	fucosidase, alpha-L- 1, tissue [Source:MGI Symbol;Acc:MGI:95593]
650	0	Ergic3	0.353903	0.676	0.375	4.78e-30	7.35e-26	ERGIC and golgi 3 [Source:MGI Symbol;Acc:MGI:1913616]
651	0	Tnfrsf1a	0.278759	0.823	0.493	8.7e-30	1.34e-25	tumor necrosis factor receptor superfamily, member 1a [Source:MGI Symbol;Acc:MGI:1314884]
652	0	Asph	0.293934	0.492	0.218	1.02e-29	1.57e-25	aspartate-beta-hydroxylase [Source:MGI Symbol;Acc:MGI:1914186]
653	0	Bod1	0.25358	0.396	0.144	1.27e-29	1.94e-25	biorientation of chromosomes in cell division 1 [Source:MGI Symbol;Acc:MGI:1916806]
654	0	Rbms1	0.325586	0.906	0.623	1.46e-29	2.25e-25	RNA binding motif, single stranded interacting protein 1 [Source:MGI Symbol;Acc:MGI:1861774]
655	0	Rnd3	0.319643	0.512	0.225	1.53e-29	2.36e-25	Rho family GTPase 3 [Source:MGI Symbol;Acc:MGI:1921444]
656	0	Slc4a4	0.273304	0.266	0.071	1.66e-29	2.54e-25	solute carrier family 4 (anion exchanger), member 4 [Source:MGI Symbol;Acc:MGI:1927555]
657	0	Irf2bpl	0.25157	0.47	0.193	2.05e-29	3.15e-25	interferon regulatory factor 2 binding protein-like [Source:MGI Symbol;Acc:MGI:2442463]
658	0	Irak3	0.251826	0.394	0.144	2.32e-29	3.56e-25	interleukin-1 receptor-associated kinase 3 [Source:MGI Symbol;Acc:MGI:1921164]
659	0	Wasl	0.276462	0.55	0.256	2.72e-29	4.18e-25	Wiskott-Aldrich syndrome-like (human) [Source:MGI Symbol;Acc:MGI:1920428]
660	0	Pkd1	0.276369	0.338	0.115	4.16e-29	6.39e-25	polycystin 1, transient receptor poteintial channel interacting [Source:MGI Symbol;Acc:MGI:97603]
661	0	Emp1	0.467467	0.696	0.408	8.1e-29	1.24e-24	epithelial membrane protein 1 [Source:MGI Symbol;Acc:MGI:107941]
662	0	Erlec1	0.292454	0.517	0.24	8.16e-29	1.25e-24	endoplasmic reticulum lectin 1 [Source:MGI Symbol;Acc:MGI:1914003]
663	0	Srpr	0.29415	0.687	0.365	9.28e-29	1.43e-24	signal recognition particle receptor ('docking protein') [Source:MGI Symbol;Acc:MGI:1914648]
664	0	Tgfb2	0.271283	0.275	0.075	1.53e-28	2.36e-24	transforming growth factor, beta 2 [Source:MGI Symbol;Acc:MGI:98726]
665	0	P4hb	0.298574	0.803	0.491	1.57e-28	2.42e-24	prolyl 4-hydroxylase, beta polypeptide [Source:MGI Symbol;Acc:MGI:97464]
666	0	Tnfrsf12a	0.31614	0.427	0.173	1.66e-28	2.55e-24	tumor necrosis factor receptor superfamily, member 12a [Source:MGI Symbol;Acc:MGI:1351484]
667	0	Hcfc1r1	0.327234	0.673	0.372	3.15e-28	4.84e-24	host cell factor C1 regulator 1 (XPO1-dependent) [Source:MGI Symbol;Acc:MGI:2663619]
668	0	Svil	0.309312	0.528	0.247	4.48e-28	6.89e-24	supervillin [Source:MGI Symbol;Acc:MGI:2147319]
669	0	Rab11fip2	0.252559	0.356	0.128	4.74e-28	7.28e-24	RAB11 family interacting protein 2 (class I) [Source:MGI Symbol;Acc:MGI:1922248]
670	0	Swi5	0.259349	0.848	0.567	4.78e-28	7.35e-24	SWI5 recombination repair homolog (yeast) [Source:MGI Symbol;Acc:MGI:1920181]
671	0	Hspa5	0.345926	0.982	0.848	5.62e-28	8.63e-24	heat shock protein 5 [Source:MGI Symbol;Acc:MGI:95835]
672	0	Gnas	0.252025	0.982	0.877	7.25e-28	1.11e-23	GNAS (guanine nucleotide binding protein, alpha stimulating) complex locus [Source:MGI Symbol;Acc:MGI:95777]
673	0	Fam220a	0.263869	0.425	0.173	7.73e-28	1.19e-23	family with sequence similarity 220, member A [Source:MGI Symbol;Acc:MGI:1914488]
674	0	Bmpr2	0.283439	0.57	0.277	5.21e-27	8.01e-23	bone morphogenetic protein receptor, type II (serine/threonine kinase) [Source:MGI Symbol;Acc:MGI:1095407]
675	0	Serpinb6a	0.299144	0.953	0.623	5.69e-27	8.75e-23	serine (or cysteine) peptidase inhibitor, clade B, member 6a [Source:MGI Symbol;Acc:MGI:103123]
676	0	Bsg	0.281844	0.899	0.645	8.62e-27	1.32e-22	basigin [Source:MGI Symbol;Acc:MGI:88208]
677	0	Dnajb4	0.331333	0.416	0.175	9.62e-27	1.48e-22	DnaJ heat shock protein family (Hsp40) member B4 [Source:MGI Symbol;Acc:MGI:1914285]
678	0	Rab2a	0.268825	0.877	0.601	1.09e-26	1.67e-22	RAB2A, member RAS oncogene family [Source:MGI Symbol;Acc:MGI:1928750]
679	0	Creb3l2	0.292829	0.4	0.164	1.28e-26	1.96e-22	cAMP responsive element binding protein 3-like 2 [Source:MGI Symbol;Acc:MGI:2442695]
680	0	Ssr3	0.268888	0.799	0.492	1.48e-26	2.27e-22	signal sequence receptor, gamma [Source:MGI Symbol;Acc:MGI:1914687]
681	0	Aldh2	0.270395	0.917	0.611	1.53e-26	2.35e-22	aldehyde dehydrogenase 2, mitochondrial [Source:MGI Symbol;Acc:MGI:99600]
682	0	Tmed1	0.253525	0.331	0.118	1.57e-26	2.41e-22	transmembrane p24 trafficking protein 1 [Source:MGI Symbol;Acc:MGI:106201]
683	0	Gm26802	0.345928	0.416	0.169	2.22e-26	3.42e-22	predicted gene, 26802 [Source:MGI Symbol;Acc:MGI:5477296]
684	0	Itm2c	0.259846	0.801	0.506	5.05e-26	7.76e-22	integral membrane protein 2C [Source:MGI Symbol;Acc:MGI:1927594]
685	0	Plin3	0.271992	0.564	0.279	5.16e-26	7.93e-22	perilipin 3 [Source:MGI Symbol;Acc:MGI:1914155]
686	0	Aig1	0.288139	0.463	0.208	7.65e-26	1.18e-21	androgen-induced 1 [Source:MGI Symbol;Acc:MGI:1913503]
687	0	Man1a	0.342419	0.745	0.454	9.56e-26	1.47e-21	mannosidase 1, alpha [Source:MGI Symbol;Acc:MGI:104677]
688	0	Ctdsp2	0.280947	0.682	0.398	3.56e-25	5.47e-21	CTD (carboxy-terminal domain, RNA polymerase II, polypeptide A) small phosphatase 2 [Source:MGI Symbol;Acc:MGI:1098748]
689	0	Dnajc3	0.272591	0.866	0.596	5.4e-25	8.3e-21	DnaJ heat shock protein family (Hsp40) member C3 [Source:MGI Symbol;Acc:MGI:107373]
690	0	Spcs1	0.268027	0.747	0.445	7.99e-25	1.23e-20	signal peptidase complex subunit 1 homolog (S. cerevisiae) [Source:MGI Symbol;Acc:MGI:1916269]
691	0	Mlec	0.289401	0.515	0.261	9.16e-25	1.41e-20	malectin [Source:MGI Symbol;Acc:MGI:1924015]
692	0	App	0.275097	0.926	0.633	2.03e-24	3.11e-20	amyloid beta (A4) precursor protein [Source:MGI Symbol;Acc:MGI:88059]
693	0	Armcx3	0.272039	0.447	0.205	2.16e-24	3.32e-20	armadillo repeat containing, X-linked 3 [Source:MGI Symbol;Acc:MGI:1918953]
694	0	2022-09-02	0.256244	0.718	0.414	3.82e-24	5.86e-20	septin 2 [Source:MGI Symbol;Acc:MGI:97298]
695	0	Smarca2	0.255817	0.523	0.255	3.99e-24	6.13e-20	SWI/SNF related, matrix associated, actin dependent regulator of chromatin, subfamily a, member 2 [Source:MGI Symbol;Acc:MGI:99603]
696	0	Ampd3	0.309757	0.333	0.131	5.46e-24	8.39e-20	adenosine monophosphate deaminase 3 [Source:MGI Symbol;Acc:MGI:1096344]
697	0	Plekhg2	0.324606	0.454	0.21	5.66e-24	8.7e-20	pleckstrin homology domain containing, family G (with RhoGef domain) member 2 [Source:MGI Symbol;Acc:MGI:2141874]
698	0	Hspa1b	0.266462	0.387	0.158	6.73e-24	1.03e-19	heat shock protein 1B [Source:MGI Symbol;Acc:MGI:99517]
699	0	Copa	0.279228	0.658	0.379	7.75e-24	1.19e-19	coatomer protein complex subunit alpha [Source:MGI Symbol;Acc:MGI:1334462]
700	0	Pdia3	0.306742	0.928	0.717	9.97e-24	1.53e-19	protein disulfide isomerase associated 3 [Source:MGI Symbol;Acc:MGI:95834]
701	0	Pbxip1	0.251854	0.485	0.228	1.07e-23	1.65e-19	pre B cell leukemia transcription factor interacting protein 1 [Source:MGI Symbol;Acc:MGI:2441670]
702	0	Tgfbr2	0.295246	0.77	0.467	2.41e-23	3.71e-19	transforming growth factor, beta receptor II [Source:MGI Symbol;Acc:MGI:98729]
703	0	Tmem167	0.300189	0.687	0.435	3.09e-23	4.75e-19	transmembrane protein 167 [Source:MGI Symbol;Acc:MGI:1913324]
704	0	Npepps	0.252866	0.454	0.209	3.38e-23	5.2e-19	aminopeptidase puromycin sensitive [Source:MGI Symbol;Acc:MGI:1101358]
705	0	Adprh	0.279627	0.512	0.265	3.97e-23	6.1e-19	ADP-ribosylarginine hydrolase [Source:MGI Symbol;Acc:MGI:1098234]
706	0	Maff	0.445648	0.432	0.214	4.61e-23	7.09e-19	v-maf musculoaponeurotic fibrosarcoma oncogene family, protein F (avian) [Source:MGI Symbol;Acc:MGI:96910]
707	0	Mia3	0.271991	0.577	0.313	5.54e-23	8.51e-19	melanoma inhibitory activity 3 [Source:MGI Symbol;Acc:MGI:2443183]
708	0	Rpn2	0.261201	0.808	0.512	7.15e-22	1.1e-17	ribophorin II [Source:MGI Symbol;Acc:MGI:98085]
709	0	Cope	0.253428	0.694	0.443	1.02e-21	1.57e-17	coatomer protein complex, subunit epsilon [Source:MGI Symbol;Acc:MGI:1891702]
710	0	Btg2	0.250982	0.964	0.823	1.33e-21	2.05e-17	BTG anti-proliferation factor 2 [Source:MGI Symbol;Acc:MGI:108384]
711	0	Nr4a3	0.428194	0.488	0.257	1.44e-21	2.22e-17	nuclear receptor subfamily 4, group A, member 3 [Source:MGI Symbol;Acc:MGI:1352457]
712	0	Rcan1	0.382033	0.336	0.141	2.17e-21	3.34e-17	regulator of calcineurin 1 [Source:MGI Symbol;Acc:MGI:1890564]
713	0	Hpgd	0.301114	0.515	0.257	3.32e-21	5.11e-17	hydroxyprostaglandin dehydrogenase 15 (NAD) [Source:MGI Symbol;Acc:MGI:108085]
714	0	Mylk	0.334514	0.282	0.104	1.15e-20	1.76e-16	myosin, light polypeptide kinase [Source:MGI Symbol;Acc:MGI:894806]
715	0	Hsp90b1	0.265198	0.973	0.791	1.96e-20	3.01e-16	heat shock protein 90, beta (Grp94), member 1 [Source:MGI Symbol;Acc:MGI:98817]
716	0	Itga5	0.253111	0.32	0.135	4.38e-20	6.74e-16	integrin alpha 5 (fibronectin receptor alpha) [Source:MGI Symbol;Acc:MGI:96604]
717	0	Jak1	0.265221	0.897	0.666	7.53e-20	1.16e-15	Janus kinase 1 [Source:MGI Symbol;Acc:MGI:96628]
718	0	Atf3	0.365477	0.85	0.63	8.51e-20	1.31e-15	activating transcription factor 3 [Source:MGI Symbol;Acc:MGI:109384]
719	0	Agap1	0.281388	0.409	0.201	1.93e-19	2.97e-15	ArfGAP with GTPase domain, ankyrin repeat and PH domain 1 [Source:MGI Symbol;Acc:MGI:2653690]
720	0	Ccnl1	0.315952	0.895	0.699	5.07e-19	7.79e-15	cyclin L1 [Source:MGI Symbol;Acc:MGI:1922664]
721	0	Ddx3y	0.292043	0.615	0.377	7.31e-19	1.12e-14	DEAD (Asp-Glu-Ala-Asp) box polypeptide 3, Y-linked [Source:MGI Symbol;Acc:MGI:1349406]
722	0	Sat1	0.317443	0.888	0.719	1.15e-12	1.77e-08	spermidine/spermine N1-acetyl transferase 1 [Source:MGI Symbol;Acc:MGI:98233]
723	1	Cd209f	2.91506	0.885	0.02	0	0	CD209f antigen [Source:MGI Symbol;Acc:MGI:1916392]
724	1	Cd209d	2.40935	0.885	0.028	1.9e-307	2.92e-303	CD209d antigen [Source:MGI Symbol;Acc:MGI:2157947]
725	1	Cbr2	1.84714	0.967	0.052	2.08e-305	3.2e-301	carbonyl reductase 2 [Source:MGI Symbol;Acc:MGI:107200]
726	1	Cd209g	1.83911	0.829	0.014	3.67e-304	5.64e-300	CD209g antigen [Source:MGI Symbol;Acc:MGI:1917442]
727	1	Folr2	2.55353	0.987	0.081	5.65e-295	8.68e-291	folate receptor 2 (fetal) [Source:MGI Symbol;Acc:MGI:95569]
728	1	Lyve1	2.33004	0.859	0.032	3.27e-293	5.02e-289	lymphatic vessel endothelial hyaluronan receptor 1 [Source:MGI Symbol;Acc:MGI:2136348]
729	1	Fcna	1.95142	0.803	0.02	2.04e-285	3.13e-281	ficolin A [Source:MGI Symbol;Acc:MGI:1340905]
730	1	Ccl24	1.90426	0.898	0.05	5.97e-274	9.17e-270	chemokine (C-C motif) ligand 24 [Source:MGI Symbol;Acc:MGI:1928953]
731	1	F13a1	2.66361	1	0.12	2.3e-273	3.53e-269	coagulation factor XIII, A1 subunit [Source:MGI Symbol;Acc:MGI:1921395]
732	1	Clec10a	2.08564	0.98	0.119	4.58e-255	7.03e-251	C-type lectin domain family 10, member A [Source:MGI Symbol;Acc:MGI:96975]
733	1	Ltc4s	1.61796	0.849	0.053	7.28e-252	1.12e-247	leukotriene C4 synthase [Source:MGI Symbol;Acc:MGI:107498]
734	1	Fxyd2	1.66676	0.862	0.069	2.07e-240	3.18e-236	FXYD domain-containing ion transport regulator 2 [Source:MGI Symbol;Acc:MGI:1195260]
735	1	Mrc1	2.26814	0.997	0.176	2.85e-235	4.38e-231	mannose receptor, C type 1 [Source:MGI Symbol;Acc:MGI:97142]
736	1	Cd163	2.0289	0.737	0.041	3.8e-224	5.84e-220	CD163 antigen [Source:MGI Symbol;Acc:MGI:2135946]
737	1	C1qc	2.08971	1	0.16	9.52e-223	1.46e-218	complement component 1, q subcomponent, C chain [Source:MGI Symbol;Acc:MGI:88225]
738	1	Pf4	2.25074	0.997	0.168	9.47e-222	1.45e-217	platelet factor 4 [Source:MGI Symbol;Acc:MGI:1888711]
739	1	C1qa	2.19116	1	0.173	2.51e-216	3.86e-212	complement component 1, q subcomponent, alpha polypeptide [Source:MGI Symbol;Acc:MGI:88223]
740	1	Stab1	1.56222	0.898	0.113	6.97e-215	1.07e-210	stabilin 1 [Source:MGI Symbol;Acc:MGI:2178742]
741	1	Wfdc17	2.29624	0.941	0.17	3.34e-204	5.13e-200	WAP four-disulfide core domain 17 [Source:MGI Symbol;Acc:MGI:3649773]
742	1	Chp2	1.05622	0.737	0.048	2.16e-202	3.31e-198	calcineurin-like EF hand protein 2 [Source:MGI Symbol;Acc:MGI:1917511]
743	1	Csf1r	1.62466	0.997	0.202	4.45e-202	6.83e-198	colony stimulating factor 1 receptor [Source:MGI Symbol;Acc:MGI:1339758]
744	1	Ninj1	1.83346	0.957	0.217	1.19e-197	1.83e-193	ninjurin 1 [Source:MGI Symbol;Acc:MGI:1196617]
745	1	Mgl2	1.4596	0.931	0.125	3.44e-191	5.29e-187	macrophage galactose N-acetyl-galactosamine specific lectin 2 [Source:MGI Symbol;Acc:MGI:2385729]
746	1	Cd209b	1.50147	0.53	0.009	4.16e-184	6.39e-180	CD209b antigen [Source:MGI Symbol;Acc:MGI:1916415]
747	1	C3ar1	1.1995	0.891	0.12	7.49e-182	1.15e-177	complement component 3a receptor 1 [Source:MGI Symbol;Acc:MGI:1097680]
748	1	C1qb	1.79137	1	0.199	1.19e-178	1.83e-174	complement component 1, q subcomponent, beta polypeptide [Source:MGI Symbol;Acc:MGI:88224]
749	1	Dab2	1.76458	0.974	0.275	2.82e-178	4.34e-174	disabled 2, mitogen-responsive phosphoprotein [Source:MGI Symbol;Acc:MGI:109175]
750	1	Fcgr2b	1.34963	0.908	0.156	5.13e-176	7.88e-172	Fc receptor, IgG, low affinity IIb [Source:MGI Symbol;Acc:MGI:95499]
751	1	Ctsc	1.70209	0.993	0.293	9.22e-174	1.42e-169	cathepsin C [Source:MGI Symbol;Acc:MGI:109553]
752	1	Adgre1	1.26394	0.911	0.153	1.27e-171	1.95e-167	adhesion G protein-coupled receptor E1 [Source:MGI Symbol;Acc:MGI:106912]
753	1	Mafb	1.76601	0.993	0.304	1.61e-170	2.48e-166	v-maf musculoaponeurotic fibrosarcoma oncogene family, protein B (avian) [Source:MGI Symbol;Acc:MGI:104555]
754	1	Fcgr3	1.30515	0.97	0.187	1.63e-170	2.51e-166	Fc receptor, IgG, low affinity III [Source:MGI Symbol;Acc:MGI:95500]
755	1	Retnla	2.57968	0.908	0.205	5.3e-169	8.14e-165	resistin like alpha [Source:MGI Symbol;Acc:MGI:1888504]
756	1	Tgfbi	1.52944	0.964	0.253	4.78e-167	7.34e-163	transforming growth factor, beta induced [Source:MGI Symbol;Acc:MGI:99959]
757	1	Cfp	1.37429	0.934	0.192	2.83e-165	4.35e-161	complement factor properdin [Source:MGI Symbol;Acc:MGI:97545]
758	1	Ms4a7	1.11927	0.77	0.087	6.87e-164	1.06e-159	membrane-spanning 4-domains, subfamily A, member 7 [Source:MGI Symbol;Acc:MGI:1918846]
759	1	Wwp1	1.39753	0.941	0.259	2.12e-163	3.26e-159	WW domain containing E3 ubiquitin protein ligase 1 [Source:MGI Symbol;Acc:MGI:1861728]
760	1	Ccl6	1.71443	0.984	0.235	1.49e-162	2.29e-158	chemokine (C-C motif) ligand 6 [Source:MGI Symbol;Acc:MGI:98263]
761	1	Ccl8	2.80203	0.645	0.057	1.19e-161	1.82e-157	chemokine (C-C motif) ligand 8 [Source:MGI Symbol;Acc:MGI:101878]
762	1	Ednrb	1.59981	0.822	0.14	3.21e-157	4.93e-153	endothelin receptor type B [Source:MGI Symbol;Acc:MGI:102720]
763	1	Cd209a	0.99067	0.592	0.036	8.87e-157	1.36e-152	CD209a antigen [Source:MGI Symbol;Acc:MGI:2157942]
764	1	C5ar1	1.08575	0.826	0.125	6.94e-156	1.07e-151	complement component 5a receptor 1 [Source:MGI Symbol;Acc:MGI:88232]
765	1	Lgmn	1.523	0.99	0.33	1.32e-153	2.04e-149	legumain [Source:MGI Symbol;Acc:MGI:1330838]
766	1	Gas6	1.432	0.974	0.318	1.4e-152	2.16e-148	growth arrest specific 6 [Source:MGI Symbol;Acc:MGI:95660]
767	1	Cd33	0.763975	0.513	0.025	2.56e-148	3.94e-144	CD33 antigen [Source:MGI Symbol;Acc:MGI:99440]
768	1	Stard8	1.10741	0.757	0.125	1.11e-147	1.7e-143	START domain containing 8 [Source:MGI Symbol;Acc:MGI:2448556]
769	1	Pepd	1.24969	0.888	0.233	1.83e-147	2.82e-143	peptidase D [Source:MGI Symbol;Acc:MGI:97542]
770	1	Mtss1	1.13554	0.786	0.141	1.79e-146	2.74e-142	MTSS I-BAR domain containing 1 [Source:MGI Symbol;Acc:MGI:2384818]
771	1	Ptafr	1.14669	0.849	0.16	1.38e-144	2.11e-140	platelet-activating factor receptor [Source:MGI Symbol;Acc:MGI:106066]
772	1	Maf	1.38895	0.99	0.446	1.47e-142	2.25e-138	avian musculoaponeurotic fibrosarcoma oncogene homolog [Source:MGI Symbol;Acc:MGI:96909]
773	1	Grn	1.45057	0.99	0.595	9.19e-140	1.41e-135	granulin [Source:MGI Symbol;Acc:MGI:95832]
774	1	Pltp	1.54979	0.98	0.442	4.06e-138	6.24e-134	phospholipid transfer protein [Source:MGI Symbol;Acc:MGI:103151]
775	1	Ehd4	1.24148	0.931	0.294	6.03e-137	9.26e-133	EH-domain containing 4 [Source:MGI Symbol;Acc:MGI:1919619]
776	1	Pld4	1.09158	0.875	0.193	7.16e-135	1.1e-130	phospholipase D family, member 4 [Source:MGI Symbol;Acc:MGI:2144765]
777	1	Hmox1	1.23697	0.868	0.242	7.97e-134	1.22e-129	heme oxygenase 1 [Source:MGI Symbol;Acc:MGI:96163]
778	1	Tfrc	0.881767	0.618	0.072	9.88e-133	1.52e-128	transferrin receptor [Source:MGI Symbol;Acc:MGI:98822]
779	1	Fcgrt	1.34789	0.99	0.597	9.47e-132	1.45e-127	Fc receptor, IgG, alpha chain transporter [Source:MGI Symbol;Acc:MGI:103017]
780	1	C4b	1.56903	0.796	0.179	9.7e-132	1.49e-127	complement component 4B (Chido blood group) [Source:MGI Symbol;Acc:MGI:88228]
781	1	Ctsb	1.45334	1	0.726	1.47e-131	2.26e-127	cathepsin B [Source:MGI Symbol;Acc:MGI:88561]
782	1	Serinc3	1.24367	1	0.695	9.04e-131	1.39e-126	serine incorporator 3 [Source:MGI Symbol;Acc:MGI:1349457]
783	1	Alox5	0.66195	0.49	0.03	6.3e-130	9.68e-126	arachidonate 5-lipoxygenase [Source:MGI Symbol;Acc:MGI:87999]
784	1	Ccl9	1.18928	0.967	0.226	1.46e-129	2.24e-125	chemokine (C-C motif) ligand 9 [Source:MGI Symbol;Acc:MGI:104533]
785	1	Apoe	1.62246	0.997	0.588	5.59e-127	8.59e-123	apolipoprotein E [Source:MGI Symbol;Acc:MGI:88057]
786	1	Hacd4	1.06083	0.783	0.178	9.16e-127	1.41e-122	3-hydroxyacyl-CoA dehydratase 4 [Source:MGI Symbol;Acc:MGI:1914025]
787	1	Pla2g2d	0.901021	0.418	0.015	2.98e-126	4.59e-122	phospholipase A2, group IID [Source:MGI Symbol;Acc:MGI:1341796]
788	1	Alox5ap	1.00342	0.947	0.226	2e-125	3.08e-121	arachidonate 5-lipoxygenase activating protein [Source:MGI Symbol;Acc:MGI:107505]
789	1	Slc9a9	0.727097	0.589	0.068	1.51e-124	2.32e-120	solute carrier family 9 (sodium/hydrogen exchanger), member 9 [Source:MGI Symbol;Acc:MGI:2679732]
790	1	Unc93b1	1.08307	0.957	0.332	1.63e-124	2.51e-120	unc-93 homolog B1, TLR signaling regulator [Source:MGI Symbol;Acc:MGI:1859307]
791	1	Snx5	1.05289	0.951	0.372	7.99e-122	1.23e-117	sorting nexin 5 [Source:MGI Symbol;Acc:MGI:1916428]
792	1	Npl	0.698039	0.451	0.028	7.27e-121	1.12e-116	N-acetylneuraminate pyruvate lyase [Source:MGI Symbol;Acc:MGI:1921341]
793	1	Sema4a	0.841427	0.694	0.115	1.38e-120	2.13e-116	sema domain, immunoglobulin domain (Ig), transmembrane domain (TM) and short cytoplasmic domain, (semaphorin) 4A [Source:MGI Symbol;Acc:MGI:107560]
794	1	P2ry12	0.547733	0.378	0.01	2.24e-120	3.44e-116	purinergic receptor P2Y, G-protein coupled 12 [Source:MGI Symbol;Acc:MGI:1918089]
795	1	Frmd4b	1.06382	0.803	0.218	5.12e-120	7.86e-116	FERM domain containing 4B [Source:MGI Symbol;Acc:MGI:2141794]
796	1	Snx2	1.20682	0.918	0.41	2.59e-119	3.99e-115	sorting nexin 2 [Source:MGI Symbol;Acc:MGI:1915054]
797	1	Rgs10	1.06654	0.928	0.319	4.62e-119	7.1e-115	regulator of G-protein signalling 10 [Source:MGI Symbol;Acc:MGI:1915115]
798	1	Mmp9	0.909206	0.424	0.021	2.01e-118	3.1e-114	matrix metallopeptidase 9 [Source:MGI Symbol;Acc:MGI:97011]
799	1	Trf	1.06115	0.987	0.384	3.19e-117	4.9e-113	transferrin [Source:MGI Symbol;Acc:MGI:98821]
800	1	Hexa	1.10718	0.987	0.537	4.09e-116	6.29e-112	hexosaminidase A [Source:MGI Symbol;Acc:MGI:96073]
801	1	Cd68	1.09686	0.914	0.275	5.77e-116	8.87e-112	CD68 antigen [Source:MGI Symbol;Acc:MGI:88342]
802	1	Man2b1	1.08278	0.921	0.364	4.61e-115	7.08e-111	mannosidase 2, alpha B1 [Source:MGI Symbol;Acc:MGI:107286]
803	1	Ms4a6d	0.804313	0.661	0.102	1.55e-114	2.38e-110	membrane-spanning 4-domains, subfamily A, member 6D [Source:MGI Symbol;Acc:MGI:1916024]
804	1	Ms4a6b	0.785625	0.743	0.13	1.9e-113	2.92e-109	membrane-spanning 4-domains, subfamily A, member 6B [Source:MGI Symbol;Acc:MGI:1917024]
805	1	Ap2a2	0.956505	0.882	0.313	4.88e-113	7.49e-109	adaptor-related protein complex 2, alpha 2 subunit [Source:MGI Symbol;Acc:MGI:101920]
806	1	Slc43a2	0.845582	0.688	0.133	4.33e-110	6.66e-106	solute carrier family 43, member 2 [Source:MGI Symbol;Acc:MGI:2442746]
807	1	Gpr34	0.707861	0.48	0.043	8.64e-110	1.33e-105	G protein-coupled receptor 34 [Source:MGI Symbol;Acc:MGI:1346334]
808	1	Lyz2	0.966515	1	0.315	1.12e-108	1.72e-104	lysozyme 2 [Source:MGI Symbol;Acc:MGI:96897]
809	1	Abca9	0.889177	0.743	0.179	3e-108	4.61e-104	ATP-binding cassette, sub-family A (ABC1), member 9 [Source:MGI Symbol;Acc:MGI:2386796]
810	1	Tbxas1	0.781253	0.681	0.12	5.63e-108	8.64e-104	thromboxane A synthase 1, platelet [Source:MGI Symbol;Acc:MGI:98497]
811	1	Rab11fip5	0.83687	0.714	0.168	6.03e-108	9.26e-104	RAB11 family interacting protein 5 (class I) [Source:MGI Symbol;Acc:MGI:1098586]
812	1	Cltc	1.01373	0.98	0.61	9.78e-108	1.5e-103	clathrin, heavy polypeptide (Hc) [Source:MGI Symbol;Acc:MGI:2388633]
813	1	Fcer1g	1.08737	0.997	0.312	4.64e-107	7.14e-103	Fc receptor, IgE, high affinity I, gamma polypeptide [Source:MGI Symbol;Acc:MGI:95496]
814	1	Fcrls	0.739533	0.701	0.116	9.66e-107	1.48e-102	Fc receptor-like S, scavenger receptor [Source:MGI Symbol;Acc:MGI:1933397]
815	1	Tmod1	0.576583	0.411	0.027	3.01e-105	4.63e-101	tropomodulin 1 [Source:MGI Symbol;Acc:MGI:98775]
816	1	Blvrb	1.10636	0.921	0.473	1.56e-104	2.4e-100	biliverdin reductase B (flavin reductase (NADPH)) [Source:MGI Symbol;Acc:MGI:2385271]
817	1	Cfh	1.37019	0.842	0.344	5.97e-104	9.18e-100	complement component factor h [Source:MGI Symbol;Acc:MGI:88385]
818	1	Gatm	0.751582	0.569	0.081	8.83e-104	1.36e-99	glycine amidinotransferase (L-arginine:glycine amidinotransferase) [Source:MGI Symbol;Acc:MGI:1914342]
819	1	Clec4a1	0.72526	0.655	0.11	2.17e-103	3.34e-99	C-type lectin domain family 4, member a1 [Source:MGI Symbol;Acc:MGI:3036291]
820	1	Ms4a8a	0.624876	0.424	0.033	8.64e-103	1.33e-98	membrane-spanning 4-domains, subfamily A, member 8A [Source:MGI Symbol;Acc:MGI:1927657]
821	1	Cybb	0.753024	0.855	0.199	8.88e-103	1.36e-98	cytochrome b-245, beta polypeptide [Source:MGI Symbol;Acc:MGI:88574]
822	1	Ctss	0.750648	0.964	0.259	1.14e-102	1.75e-98	cathepsin S [Source:MGI Symbol;Acc:MGI:107341]
823	1	Gmfg	0.89594	0.891	0.266	5.41e-102	8.32e-98	glia maturation factor, gamma [Source:MGI Symbol;Acc:MGI:1927135]
824	1	Itsn1	0.860898	0.701	0.179	3.01e-101	4.63e-97	intersectin 1 (SH3 domain protein 1A) [Source:MGI Symbol;Acc:MGI:1338069]
825	1	Hpgds	0.666595	0.52	0.063	5.45e-101	8.38e-97	hematopoietic prostaglandin D synthase [Source:MGI Symbol;Acc:MGI:1859384]
826	1	C5ar2	0.546189	0.398	0.026	2.08e-100	3.19e-96	complement component 5a receptor 2 [Source:MGI Symbol;Acc:MGI:2442013]
827	1	Timd4	0.665264	0.342	0.014	1.07e-99	1.64e-95	T cell immunoglobulin and mucin domain containing 4 [Source:MGI Symbol;Acc:MGI:2445125]
828	1	Clec4a3	0.811105	0.697	0.143	6.01e-99	9.23e-95	C-type lectin domain family 4, member a3 [Source:MGI Symbol;Acc:MGI:1920399]
829	1	Ier3	1.31041	0.947	0.537	2.16e-98	3.32e-94	immediate early response 3 [Source:MGI Symbol;Acc:MGI:104814]
830	1	2022-03-01	0.715747	0.5	0.064	2.29e-98	3.51e-94	membrane-associated ring finger (C3HC4) 1 [Source:MGI Symbol;Acc:MGI:1920175]
831	1	Gfra2	0.743954	0.53	0.076	2.32e-98	3.57e-94	glial cell line derived neurotrophic factor family receptor alpha 2 [Source:MGI Symbol;Acc:MGI:1195462]
832	1	Aif1	0.792605	0.766	0.167	2.48e-98	3.81e-94	allograft inflammatory factor 1 [Source:MGI Symbol;Acc:MGI:1343098]
833	1	Ms4a6c	0.730276	0.717	0.143	9.98e-98	1.53e-93	membrane-spanning 4-domains, subfamily A, member 6C [Source:MGI Symbol;Acc:MGI:2385644]
834	1	Dse	0.905101	0.753	0.235	5.85e-96	8.99e-92	dermatan sulfate epimerase [Source:MGI Symbol;Acc:MGI:2443455]
835	1	Ftl1	0.77174	1	0.97	9.04e-96	1.39e-91	ferritin light polypeptide 1 [Source:MGI Symbol;Acc:MGI:95589]
836	1	Myo5a	0.885658	0.688	0.172	1.53e-95	2.35e-91	myosin VA [Source:MGI Symbol;Acc:MGI:105976]
837	1	Dclre1c	0.664031	0.53	0.077	2.62e-95	4.03e-91	DNA cross-link repair 1C [Source:MGI Symbol;Acc:MGI:2441769]
838	1	Serpinb8	0.627379	0.51	0.069	1.68e-94	2.58e-90	serine (or cysteine) peptidase inhibitor, clade B, member 8 [Source:MGI Symbol;Acc:MGI:894657]
839	1	Ap1b1	0.704112	0.641	0.141	2.41e-92	3.7e-88	adaptor protein complex AP-1, beta 1 subunit [Source:MGI Symbol;Acc:MGI:1096368]
840	1	Tnfaip8l2	0.697136	0.618	0.116	1.81e-91	2.77e-87	tumor necrosis factor, alpha-induced protein 8-like 2 [Source:MGI Symbol;Acc:MGI:1917019]
841	1	Tmem176a	0.842215	0.882	0.283	1.91e-91	2.94e-87	transmembrane protein 176A [Source:MGI Symbol;Acc:MGI:1913308]
842	1	Ccl2	1.09608	0.832	0.259	4.64e-91	7.13e-87	chemokine (C-C motif) ligand 2 [Source:MGI Symbol;Acc:MGI:98259]
843	1	Nrros	0.756709	0.747	0.188	5.35e-91	8.22e-87	negative regulator of reactive oxygen species [Source:MGI Symbol;Acc:MGI:2445095]
844	1	Tmem106a	0.80342	0.724	0.206	4.82e-90	7.41e-86	transmembrane protein 106A [Source:MGI Symbol;Acc:MGI:1922056]
845	1	Cmah	0.725287	0.513	0.079	1.24e-89	1.9e-85	cytidine monophospho-N-acetylneuraminic acid hydroxylase [Source:MGI Symbol;Acc:MGI:103227]
846	1	Itm2b	0.643802	1	0.948	3e-89	4.62e-85	integral membrane protein 2B [Source:MGI Symbol;Acc:MGI:1309517]
847	1	Cst3	0.599851	0.997	0.899	9.57e-89	1.47e-84	cystatin C [Source:MGI Symbol;Acc:MGI:102519]
848	1	Rnasel	0.761474	0.576	0.119	8.53e-88	1.31e-83	ribonuclease L (2', 5'-oligoisoadenylate synthetase-dependent) [Source:MGI Symbol;Acc:MGI:1098272]
849	1	Sulf2	0.892418	0.776	0.256	1.02e-87	1.57e-83	sulfatase 2 [Source:MGI Symbol;Acc:MGI:1919293]
850	1	Mpp1	0.812823	0.789	0.28	1.77e-87	2.72e-83	membrane protein, palmitoylated [Source:MGI Symbol;Acc:MGI:105941]
851	1	Tmem176b	0.868948	0.921	0.353	5.65e-87	8.68e-83	transmembrane protein 176B [Source:MGI Symbol;Acc:MGI:1916348]
852	1	Lamp1	0.840222	0.984	0.754	3.89e-86	5.98e-82	lysosomal-associated membrane protein 1 [Source:MGI Symbol;Acc:MGI:96745]
853	1	Ang	0.856646	0.671	0.186	4.63e-86	7.11e-82	angiogenin, ribonuclease, RNase A family, 5 [Source:MGI Symbol;Acc:MGI:88022]
854	1	Igf1	0.715723	0.941	0.356	9.54e-86	1.47e-81	insulin-like growth factor 1 [Source:MGI Symbol;Acc:MGI:96432]
855	1	Cd86	0.760772	0.625	0.134	2.44e-85	3.74e-81	CD86 antigen [Source:MGI Symbol;Acc:MGI:101773]
856	1	Mfsd11	0.70461	0.579	0.123	2.86e-85	4.4e-81	major facilitator superfamily domain containing 11 [Source:MGI Symbol;Acc:MGI:1917150]
857	1	Il6ra	0.811543	0.786	0.272	3.23e-85	4.97e-81	interleukin 6 receptor, alpha [Source:MGI Symbol;Acc:MGI:105304]
858	1	Spi1	0.688474	0.822	0.212	4.41e-85	6.78e-81	spleen focus forming virus (SFFV) proviral integration oncogene [Source:MGI Symbol;Acc:MGI:98282]
859	1	Evi2a	0.738939	0.75	0.195	5.39e-85	8.28e-81	ecotropic viral integration site 2a [Source:MGI Symbol;Acc:MGI:95458]
860	1	Ptpn18	0.801359	0.918	0.325	7.74e-85	1.19e-80	protein tyrosine phosphatase, non-receptor type 18 [Source:MGI Symbol;Acc:MGI:108410]
861	1	Ctsa	0.792199	0.872	0.354	9.77e-85	1.5e-80	cathepsin A [Source:MGI Symbol;Acc:MGI:97748]
862	1	Marcksl1	0.835635	0.72	0.191	4.8e-84	7.38e-80	MARCKS-like 1 [Source:MGI Symbol;Acc:MGI:97143]
863	1	Ctsh	0.860819	0.98	0.572	1.42e-83	2.18e-79	cathepsin H [Source:MGI Symbol;Acc:MGI:107285]
864	1	Ly86	0.646878	0.753	0.187	1.84e-83	2.83e-79	lymphocyte antigen 86 [Source:MGI Symbol;Acc:MGI:1321404]
865	1	Clta	0.785203	0.98	0.776	1.98e-83	3.04e-79	clathrin, light polypeptide (Lca) [Source:MGI Symbol;Acc:MGI:894297]
866	1	Ptprj	0.709391	0.691	0.186	2.23e-83	3.42e-79	protein tyrosine phosphatase, receptor type, J [Source:MGI Symbol;Acc:MGI:104574]
867	1	Pdgfc	0.501285	0.375	0.035	3.29e-83	5.06e-79	platelet-derived growth factor, C polypeptide [Source:MGI Symbol;Acc:MGI:1859631]
868	1	Lyl1	0.658417	0.457	0.065	6.21e-83	9.54e-79	lymphoblastomic leukemia 1 [Source:MGI Symbol;Acc:MGI:96891]
869	1	Slco2b1	0.756404	0.711	0.207	3.1e-82	4.76e-78	solute carrier organic anion transporter family, member 2b1 [Source:MGI Symbol;Acc:MGI:1351872]
870	1	B4galt6	0.645491	0.516	0.09	3.18e-82	4.89e-78	UDP-Gal:betaGlcNAc beta 1,4-galactosyltransferase, polypeptide 6 [Source:MGI Symbol;Acc:MGI:1928380]
871	1	Laptm5	0.807546	0.987	0.333	3.43e-82	5.28e-78	lysosomal-associated protein transmembrane 5 [Source:MGI Symbol;Acc:MGI:108046]
872	1	Tyrobp	0.761178	0.98	0.288	6.78e-82	1.04e-77	TYRO protein tyrosine kinase binding protein [Source:MGI Symbol;Acc:MGI:1277211]
873	1	Cyth4	0.717268	0.75	0.203	7.21e-82	1.11e-77	cytohesin 4 [Source:MGI Symbol;Acc:MGI:2441702]
874	1	Tmem37	0.688573	0.536	0.096	2.51e-81	3.86e-77	transmembrane protein 37 [Source:MGI Symbol;Acc:MGI:2157899]
875	1	Lifr	0.879444	0.799	0.294	2.61e-80	4.01e-76	LIF receptor alpha [Source:MGI Symbol;Acc:MGI:96788]
876	1	Tlr7	0.4732	0.372	0.036	3.07e-79	4.72e-75	toll-like receptor 7 [Source:MGI Symbol;Acc:MGI:2176882]
877	1	Pirb	0.655022	0.664	0.161	3.91e-78	6.01e-74	paired Ig-like receptor B [Source:MGI Symbol;Acc:MGI:894311]
878	1	Lcp1	0.723009	0.951	0.316	5.61e-78	8.63e-74	lymphocyte cytosolic protein 1 [Source:MGI Symbol;Acc:MGI:104808]
879	1	Itgam	0.6184	0.602	0.124	6.85e-78	1.05e-73	integrin alpha M [Source:MGI Symbol;Acc:MGI:96607]
880	1	Rnf150	0.60193	0.5	0.091	7.65e-78	1.18e-73	ring finger protein 150 [Source:MGI Symbol;Acc:MGI:2443860]
881	1	Rassf4	0.652987	0.747	0.199	3.18e-77	4.89e-73	Ras association (RalGDS/AF-6) domain family member 4 [Source:MGI Symbol;Acc:MGI:2386853]
882	1	Glul	0.778361	0.908	0.447	4.78e-77	7.35e-73	glutamate-ammonia ligase (glutamine synthetase) [Source:MGI Symbol;Acc:MGI:95739]
883	1	Tsc22d3	0.815807	0.875	0.384	5.94e-77	9.13e-73	TSC22 domain family, member 3 [Source:MGI Symbol;Acc:MGI:1196284]
884	1	Rasgrp4	0.482892	0.395	0.046	1.2e-76	1.84e-72	RAS guanyl releasing protein 4 [Source:MGI Symbol;Acc:MGI:2386851]
885	1	Rps29	0.52954	1	0.955	6.42e-76	9.86e-72	ribosomal protein S29 [Source:MGI Symbol;Acc:MGI:107681]
886	1	Rab3il1	0.745946	0.681	0.212	3.78e-75	5.8e-71	RAB3A interacting protein (rabin3)-like 1 [Source:MGI Symbol;Acc:MGI:1922010]
887	1	Ddx60	0.525984	0.382	0.046	1.16e-74	1.78e-70	DEAD (Asp-Glu-Ala-Asp) box polypeptide 60 [Source:MGI Symbol;Acc:MGI:2384570]
888	1	Tcn2	0.83052	0.727	0.27	3.45e-74	5.31e-70	transcobalamin 2 [Source:MGI Symbol;Acc:MGI:98534]
889	1	Epsti1	0.442	0.658	0.156	8.16e-74	1.25e-69	epithelial stromal interaction 1 (breast) [Source:MGI Symbol;Acc:MGI:1915168]
890	1	Mctp1	0.581163	0.405	0.055	8.33e-74	1.28e-69	multiple C2 domains, transmembrane 1 [Source:MGI Symbol;Acc:MGI:1926021]
891	1	Gltp	0.759653	0.845	0.356	1.18e-73	1.82e-69	glycolipid transfer protein [Source:MGI Symbol;Acc:MGI:1929253]
892	1	Selenbp1	0.687093	0.674	0.204	2.11e-73	3.24e-69	selenium binding protein 1 [Source:MGI Symbol;Acc:MGI:96825]
893	1	Cd300ld	0.633942	0.549	0.113	6.52e-73	1e-68	CD300 molecule like family member d [Source:MGI Symbol;Acc:MGI:2442358]
894	1	Pla2g15	0.591099	0.526	0.112	9.19e-73	1.41e-68	phospholipase A2, group XV [Source:MGI Symbol;Acc:MGI:2178076]
895	1	Gprc5c	0.455017	0.326	0.03	2.33e-72	3.59e-68	G protein-coupled receptor, family C, group 5, member C [Source:MGI Symbol;Acc:MGI:1917605]
896	1	Plek	0.694376	0.75	0.213	4.81e-72	7.4e-68	pleckstrin [Source:MGI Symbol;Acc:MGI:1860485]
897	1	Rgl1	0.756781	0.773	0.307	7.38e-72	1.13e-67	ral guanine nucleotide dissociation stimulator,-like 1 [Source:MGI Symbol;Acc:MGI:107484]
898	1	BC005537	0.773487	0.964	0.629	1.2e-71	1.85e-67	cDNA sequence BC005537 [Source:MGI Symbol;Acc:MGI:2441726]
899	1	Pla2g7	0.595818	0.536	0.108	1.59e-71	2.44e-67	phospholipase A2, group VII (platelet-activating factor acetylhydrolase, plasma) [Source:MGI Symbol;Acc:MGI:1351327]
900	1	Tmem8	0.389075	0.286	0.019	4.15e-71	6.38e-67	transmembrane protein 8 [Source:MGI Symbol;Acc:MGI:1926283]
901	1	Cd48	0.56227	0.773	0.221	9.94e-71	1.53e-66	CD48 antigen [Source:MGI Symbol;Acc:MGI:88339]
902	1	mt-Co1	0.470499	0.997	0.985	2.04e-70	3.13e-66	mitochondrially encoded cytochrome c oxidase I [Source:MGI Symbol;Acc:MGI:102504]
903	1	Agtrap	0.643991	0.618	0.177	3.45e-70	5.31e-66	angiotensin II, type I receptor-associated protein [Source:MGI Symbol;Acc:MGI:1339977]
904	1	Vsir	0.699296	0.796	0.31	1.11e-69	1.71e-65	V-set immunoregulatory receptor [Source:MGI Symbol;Acc:MGI:1921298]
905	1	Bank1	0.484886	0.368	0.044	2.65e-69	4.08e-65	B cell scaffold protein with ankyrin repeats 1 [Source:MGI Symbol;Acc:MGI:2442120]
906	1	Mertk	0.507535	0.447	0.079	2.23e-68	3.43e-64	MER proto-oncogene tyrosine kinase [Source:MGI Symbol;Acc:MGI:96965]
907	1	Mef2c	0.664134	0.836	0.309	2.39e-68	3.67e-64	myocyte enhancer factor 2C [Source:MGI Symbol;Acc:MGI:99458]
908	1	Cd53	0.592286	0.859	0.269	3.37e-68	5.18e-64	CD53 antigen [Source:MGI Symbol;Acc:MGI:88341]
909	1	Cd14	0.591205	0.753	0.211	3.41e-68	5.24e-64	CD14 antigen [Source:MGI Symbol;Acc:MGI:88318]
910	1	Dhrs3	0.752849	0.826	0.36	1.62e-67	2.49e-63	dehydrogenase/reductase (SDR family) member 3 [Source:MGI Symbol;Acc:MGI:1315215]
911	1	Cd74	0.654558	0.954	0.313	1.8e-67	2.77e-63	CD74 antigen (invariant polypeptide of major histocompatibility complex, class II antigen-associated) [Source:MGI Symbol;Acc:MGI:96534]
912	1	Abca1	0.774402	0.793	0.333	2e-67	3.08e-63	ATP-binding cassette, sub-family A (ABC1), member 1 [Source:MGI Symbol;Acc:MGI:99607]
913	1	Ncf2	0.581343	0.661	0.173	4.15e-67	6.38e-63	neutrophil cytosolic factor 2 [Source:MGI Symbol;Acc:MGI:97284]
914	1	Slc11a1	0.576288	0.549	0.124	9.31e-67	1.43e-62	solute carrier family 11 (proton-coupled divalent metal ion transporters), member 1 [Source:MGI Symbol;Acc:MGI:1345275]
915	1	Ncf1	0.588054	0.526	0.115	1.1e-66	1.69e-62	neutrophil cytosolic factor 1 [Source:MGI Symbol;Acc:MGI:97283]
916	1	Kctd12	0.723112	0.891	0.445	2.14e-65	3.29e-61	potassium channel tetramerisation domain containing 12 [Source:MGI Symbol;Acc:MGI:2145823]
917	1	Dnase2a	0.626349	0.612	0.176	2.46e-65	3.78e-61	deoxyribonuclease II alpha [Source:MGI Symbol;Acc:MGI:1329019]
918	1	Slc6a6	0.613876	0.852	0.355	5.4e-65	8.31e-61	solute carrier family 6 (neurotransmitter transporter, taurine), member 6 [Source:MGI Symbol;Acc:MGI:98488]
919	1	Fgd2	0.542301	0.444	0.081	6.39e-65	9.82e-61	FYVE, RhoGEF and PH domain containing 2 [Source:MGI Symbol;Acc:MGI:1347084]
920	1	Atp13a2	0.527973	0.51	0.114	7.34e-65	1.13e-60	ATPase type 13A2 [Source:MGI Symbol;Acc:MGI:1922022]
921	1	Arhgdib	0.640852	0.901	0.348	8.83e-65	1.36e-60	Rho, GDP dissociation inhibitor (GDI) beta [Source:MGI Symbol;Acc:MGI:101940]
922	1	Tpp1	0.667091	0.727	0.291	5.43e-64	8.34e-60	tripeptidyl peptidase I [Source:MGI Symbol;Acc:MGI:1336194]
923	1	Adrb2	0.578615	0.464	0.091	5.92e-64	9.1e-60	adrenergic receptor, beta 2 [Source:MGI Symbol;Acc:MGI:87938]
924	1	Etv1	0.425927	0.332	0.041	2.45e-63	3.77e-59	ets variant 1 [Source:MGI Symbol;Acc:MGI:99254]
925	1	Tbc1d14	0.514849	0.484	0.108	8.67e-63	1.33e-58	TBC1 domain family, member 14 [Source:MGI Symbol;Acc:MGI:1098708]
926	1	Eps8	0.714224	0.783	0.357	1.06e-62	1.63e-58	epidermal growth factor receptor pathway substrate 8 [Source:MGI Symbol;Acc:MGI:104684]
927	1	P2ry6	0.58091	0.47	0.097	1.12e-62	1.72e-58	pyrimidinergic receptor P2Y, G-protein coupled, 6 [Source:MGI Symbol;Acc:MGI:2673874]
928	1	Bin1	0.70816	0.734	0.313	1.76e-62	2.71e-58	bridging integrator 1 [Source:MGI Symbol;Acc:MGI:108092]
929	1	Prune2	0.391186	0.306	0.032	2.58e-62	3.97e-58	prune homolog 2 [Source:MGI Symbol;Acc:MGI:1925004]
930	1	Arhgef3	0.551218	0.49	0.112	4.82e-62	7.41e-58	Rho guanine nucleotide exchange factor (GEF) 3 [Source:MGI Symbol;Acc:MGI:1918954]
931	1	Rnf130	0.696889	0.849	0.474	3.27e-61	5.02e-57	ring finger protein 130 [Source:MGI Symbol;Acc:MGI:1891717]
932	1	Cysltr1	0.501119	0.431	0.082	8.06e-61	1.24e-56	cysteinyl leukotriene receptor 1 [Source:MGI Symbol;Acc:MGI:1926218]
933	1	Syk	0.547123	0.655	0.195	2.54e-60	3.9e-56	spleen tyrosine kinase [Source:MGI Symbol;Acc:MGI:99515]
934	1	9930111J21Rik2	0.538553	0.704	0.23	2.91e-60	4.48e-56	RIKEN cDNA 9930111J21 gene 2 [Source:MGI Symbol;Acc:MGI:3711310]
935	1	Ctsd	0.68649	0.931	0.656	6.51e-60	1e-55	cathepsin D [Source:MGI Symbol;Acc:MGI:88562]
936	1	Necap2	0.628972	0.72	0.281	1.22e-59	1.88e-55	NECAP endocytosis associated 2 [Source:MGI Symbol;Acc:MGI:1913397]
937	1	Cd37	0.497947	0.503	0.113	4.9e-59	7.54e-55	CD37 antigen [Source:MGI Symbol;Acc:MGI:88330]
938	1	Prcp	0.544669	0.747	0.277	5.14e-59	7.89e-55	prolylcarboxypeptidase (angiotensinase C) [Source:MGI Symbol;Acc:MGI:1919711]
939	1	Psd3	0.670031	0.546	0.162	6.2e-59	9.52e-55	pleckstrin and Sec7 domain containing 3 [Source:MGI Symbol;Acc:MGI:1918215]
940	1	Lrp6	0.684962	0.688	0.281	6.54e-59	1.01e-54	low density lipoprotein receptor-related protein 6 [Source:MGI Symbol;Acc:MGI:1298218]
941	1	Smagp	0.51345	0.589	0.156	6.69e-59	1.03e-54	small cell adhesion glycoprotein [Source:MGI Symbol;Acc:MGI:2448476]
942	1	Msr1	0.424005	0.316	0.038	9.51e-59	1.46e-54	macrophage scavenger receptor 1 [Source:MGI Symbol;Acc:MGI:98257]
943	1	Rgs18	0.457881	0.408	0.075	9.91e-59	1.52e-54	regulator of G-protein signaling 18 [Source:MGI Symbol;Acc:MGI:1927498]
944	1	Gda	0.737596	0.852	0.431	3.39e-58	5.21e-54	guanine deaminase [Source:MGI Symbol;Acc:MGI:95678]
945	1	Plekhg5	0.441136	0.368	0.059	3.6e-58	5.53e-54	pleckstrin homology domain containing, family G (with RhoGef domain) member 5 [Source:MGI Symbol;Acc:MGI:2652860]
946	1	Cln8	0.514664	0.47	0.109	4.89e-58	7.51e-54	ceroid-lipofuscinosis, neuronal 8 [Source:MGI Symbol;Acc:MGI:1349447]
947	1	Adam15	0.686456	0.766	0.35	7.18e-58	1.1e-53	a disintegrin and metallopeptidase domain 15 (metargidin) [Source:MGI Symbol;Acc:MGI:1333882]
948	1	Pid1	0.563897	0.783	0.319	7.79e-58	1.2e-53	phosphotyrosine interaction domain containing 1 [Source:MGI Symbol;Acc:MGI:2138391]
949	1	Cxcl2	0.492174	0.75	0.24	9.27e-58	1.42e-53	chemokine (C-X-C motif) ligand 2 [Source:MGI Symbol;Acc:MGI:1340094]
950	1	Sgpl1	0.634171	0.602	0.197	1.9e-57	2.92e-53	sphingosine phosphate lyase 1 [Source:MGI Symbol;Acc:MGI:1261415]
951	1	H2-Aa	0.675122	0.852	0.285	2.34e-57	3.6e-53	histocompatibility 2, class II antigen A, alpha [Source:MGI Symbol;Acc:MGI:95895]
952	1	Tmcc1	0.677219	0.638	0.232	3.63e-57	5.58e-53	transmembrane and coiled coil domains 1 [Source:MGI Symbol;Acc:MGI:2442368]
953	1	Tifa	0.438255	0.421	0.085	4.74e-57	7.29e-53	TRAF-interacting protein with forkhead-associated domain [Source:MGI Symbol;Acc:MGI:2182965]
954	1	Sirpa	0.598301	0.796	0.343	5.61e-57	8.62e-53	signal-regulatory protein alpha [Source:MGI Symbol;Acc:MGI:108563]
955	1	Ap2m1	0.743098	0.829	0.471	7.65e-57	1.18e-52	adaptor-related protein complex 2, mu 1 subunit [Source:MGI Symbol;Acc:MGI:1298405]
956	1	Ccl12	0.791323	0.266	0.025	1.74e-56	2.68e-52	chemokine (C-C motif) ligand 12 [Source:MGI Symbol;Acc:MGI:108224]
957	1	Cmklr1	0.545574	0.51	0.137	2.35e-56	3.62e-52	chemokine-like receptor 1 [Source:MGI Symbol;Acc:MGI:109603]
958	1	Adap2	0.513184	0.516	0.132	2.77e-56	4.26e-52	ArfGAP with dual PH domains 2 [Source:MGI Symbol;Acc:MGI:2663075]
959	1	Abhd12	0.557518	0.678	0.242	5.28e-56	8.11e-52	abhydrolase domain containing 12 [Source:MGI Symbol;Acc:MGI:1923442]
960	1	Tmem141	0.50916	0.424	0.09	6.2e-56	9.53e-52	transmembrane protein 141 [Source:MGI Symbol;Acc:MGI:1098773]
961	1	Kcnk6	0.443208	0.342	0.053	7.38e-56	1.13e-51	potassium inwardly-rectifying channel, subfamily K, member 6 [Source:MGI Symbol;Acc:MGI:1891291]
962	1	Atp2b1	0.646965	0.951	0.612	1.04e-55	1.59e-51	ATPase, Ca++ transporting, plasma membrane 1 [Source:MGI Symbol;Acc:MGI:104653]
963	1	Atp6v0b	0.587752	0.954	0.652	1.48e-55	2.27e-51	ATPase, H+ transporting, lysosomal V0 subunit B [Source:MGI Symbol;Acc:MGI:1890510]
964	1	Lair1	0.475321	0.359	0.058	1.66e-55	2.56e-51	leukocyte-associated Ig-like receptor 1 [Source:MGI Symbol;Acc:MGI:105492]
965	1	Nckap1l	0.519871	0.569	0.156	2.22e-55	3.41e-51	NCK associated protein 1 like [Source:MGI Symbol;Acc:MGI:1926063]
966	1	Gns	0.645935	0.707	0.31	4.31e-55	6.62e-51	glucosamine (N-acetyl)-6-sulfatase [Source:MGI Symbol;Acc:MGI:1922862]
967	1	Sdc3	0.568392	0.664	0.228	4.48e-55	6.89e-51	syndecan 3 [Source:MGI Symbol;Acc:MGI:1349163]
968	1	Arrb2	0.466376	0.52	0.137	1.42e-54	2.19e-50	arrestin, beta 2 [Source:MGI Symbol;Acc:MGI:99474]
969	1	Eps15	0.640133	0.714	0.329	1.87e-54	2.87e-50	epidermal growth factor receptor pathway substrate 15 [Source:MGI Symbol;Acc:MGI:104583]
970	1	Pmp22	0.653756	0.888	0.492	2.13e-54	3.27e-50	peripheral myelin protein 22 [Source:MGI Symbol;Acc:MGI:97631]
971	1	Snx6	0.644225	0.78	0.401	2.74e-54	4.21e-50	sorting nexin 6 [Source:MGI Symbol;Acc:MGI:1919433]
972	1	Iqgap2	0.613657	0.645	0.234	3.29e-54	5.06e-50	IQ motif containing GTPase activating protein 2 [Source:MGI Symbol;Acc:MGI:2449975]
973	1	Dok2	0.526218	0.671	0.199	3.55e-54	5.46e-50	docking protein 2 [Source:MGI Symbol;Acc:MGI:1332623]
974	1	Foxp1	0.645442	0.842	0.473	4.32e-54	6.65e-50	forkhead box P1 [Source:MGI Symbol;Acc:MGI:1914004]
975	1	Idh2	0.630773	0.681	0.285	4.45e-54	6.83e-50	isocitrate dehydrogenase 2 (NADP+), mitochondrial [Source:MGI Symbol;Acc:MGI:96414]
976	1	Zeb2	0.622304	0.961	0.589	4.95e-54	7.61e-50	zinc finger E-box binding homeobox 2 [Source:MGI Symbol;Acc:MGI:1344407]
977	1	Rbpj	0.621105	0.888	0.484	5.13e-54	7.88e-50	recombination signal binding protein for immunoglobulin kappa J region [Source:MGI Symbol;Acc:MGI:96522]
978	1	AI467606	0.417552	0.336	0.052	1.29e-53	1.99e-49	expressed sequence AI467606 [Source:MGI Symbol;Acc:MGI:2141979]
979	1	Ly96	0.479383	0.457	0.115	1.64e-53	2.53e-49	lymphocyte antigen 96 [Source:MGI Symbol;Acc:MGI:1341909]
980	1	P3h2	0.341251	0.286	0.035	2.12e-53	3.26e-49	prolyl 3-hydroxylase 2 [Source:MGI Symbol;Acc:MGI:2146663]
981	1	Snx8	0.508139	0.441	0.105	2.6e-53	4e-49	sorting nexin 8 [Source:MGI Symbol;Acc:MGI:2443816]
982	1	Arhgap17	0.553537	0.757	0.341	5.4e-53	8.3e-49	Rho GTPase activating protein 17 [Source:MGI Symbol;Acc:MGI:1917747]
983	1	Stk17b	0.519698	0.734	0.27	2e-52	3.08e-48	serine/threonine kinase 17b (apoptosis-inducing) [Source:MGI Symbol;Acc:MGI:2138162]
984	1	Lmo2	0.593423	0.73	0.338	4.08e-52	6.27e-48	LIM domain only 2 [Source:MGI Symbol;Acc:MGI:102811]
985	1	Ucp2	0.536034	0.905	0.376	8.05e-52	1.24e-47	uncoupling protein 2 (mitochondrial, proton carrier) [Source:MGI Symbol;Acc:MGI:109354]
986	1	Lilrb4a	0.427441	0.582	0.157	1.13e-51	1.74e-47	leukocyte immunoglobulin-like receptor, subfamily B, member 4A [Source:MGI Symbol;Acc:MGI:102701]
987	1	Fam234a	0.434573	0.421	0.098	8.23e-51	1.26e-46	family with sequence similarity 234, member A [Source:MGI Symbol;Acc:MGI:2146854]
988	1	Trem2	0.340881	0.513	0.125	1.26e-50	1.94e-46	triggering receptor expressed on myeloid cells 2 [Source:MGI Symbol;Acc:MGI:1913150]
989	1	Tpd52	0.401199	0.711	0.237	1.26e-50	1.94e-46	tumor protein D52 [Source:MGI Symbol;Acc:MGI:107749]
990	1	Nfkbid	0.618904	0.582	0.184	1.86e-50	2.86e-46	nuclear factor of kappa light polypeptide gene enhancer in B cells inhibitor, delta [Source:MGI Symbol;Acc:MGI:3041243]
991	1	Fcgr1	0.426108	0.391	0.076	1.91e-50	2.93e-46	Fc receptor, IgG, high affinity I [Source:MGI Symbol;Acc:MGI:95498]
992	1	Cd38	0.467071	0.457	0.109	2.19e-50	3.37e-46	CD38 antigen [Source:MGI Symbol;Acc:MGI:107474]
993	1	H2-Ab1	0.48371	0.849	0.297	3.5e-50	5.37e-46	histocompatibility 2, class II antigen A, beta 1 [Source:MGI Symbol;Acc:MGI:103070]
994	1	Tanc2	0.474586	0.438	0.111	9.39e-50	1.44e-45	tetratricopeptide repeat, ankyrin repeat and coiled-coil containing 2 [Source:MGI Symbol;Acc:MGI:2444121]
995	1	Pik3cg	0.373085	0.309	0.046	9.79e-50	1.5e-45	phosphatidylinositol-4,5-bisphosphate 3-kinase catalytic subunit gamma [Source:MGI Symbol;Acc:MGI:1353576]
996	1	Gnpda1	0.486747	0.411	0.097	1.73e-49	2.66e-45	glucosamine-6-phosphate deaminase 1 [Source:MGI Symbol;Acc:MGI:1347054]
997	1	5031439G07Rik	0.511358	0.625	0.219	2.4e-49	3.69e-45	RIKEN cDNA 5031439G07 gene [Source:MGI Symbol;Acc:MGI:2444899]
998	1	Ccl7	0.976614	0.609	0.213	2.71e-49	4.16e-45	chemokine (C-C motif) ligand 7 [Source:MGI Symbol;Acc:MGI:99512]
999	1	Pou2f2	0.403737	0.408	0.084	3.11e-49	4.77e-45	POU domain, class 2, transcription factor 2 [Source:MGI Symbol;Acc:MGI:101897]
1000	1	Ccr1	0.549836	0.355	0.068	4.94e-49	7.59e-45	chemokine (C-C motif) receptor 1 [Source:MGI Symbol;Acc:MGI:104618]
1001	1	Il16	0.405841	0.368	0.074	5.8e-49	8.91e-45	interleukin 16 [Source:MGI Symbol;Acc:MGI:1270855]
1002	1	Ptpro	0.462689	0.388	0.082	6.32e-49	9.71e-45	protein tyrosine phosphatase, receptor type, O [Source:MGI Symbol;Acc:MGI:1097152]
1003	1	Gas7	0.556365	0.78	0.365	7.2e-49	1.11e-44	growth arrest specific 7 [Source:MGI Symbol;Acc:MGI:1202388]
1004	1	Rsrp1	0.636049	0.97	0.781	7.41e-49	1.14e-44	arginine/serine rich protein 1 [Source:MGI Symbol;Acc:MGI:106498]
1005	1	Lilr4b	0.506189	0.523	0.145	9.12e-49	1.4e-44	leukocyte immunoglobulin-like receptor, subfamily B, member 4B [Source:MGI Symbol;Acc:MGI:102702]
1006	1	Fbxl18	0.617852	0.556	0.184	1.23e-48	1.89e-44	F-box and leucine-rich repeat protein 18 [Source:MGI Symbol;Acc:MGI:2444450]
1007	1	Lipa	0.538551	0.747	0.344	1.5e-48	2.3e-44	lysosomal acid lipase A [Source:MGI Symbol;Acc:MGI:96789]
1008	1	Rab31	0.488142	0.516	0.165	1.75e-48	2.69e-44	RAB31, member RAS oncogene family [Source:MGI Symbol;Acc:MGI:1914603]
1009	1	Sft2d2	0.505446	0.5	0.155	5.41e-48	8.32e-44	SFT2 domain containing 2 [Source:MGI Symbol;Acc:MGI:1917362]
1010	1	Creg1	0.535071	0.852	0.478	5.65e-48	8.67e-44	cellular repressor of E1A-stimulated genes 1 [Source:MGI Symbol;Acc:MGI:1344382]
1011	1	Tep1	0.515105	0.553	0.177	5.66e-48	8.7e-44	telomerase associated protein 1 [Source:MGI Symbol;Acc:MGI:109573]
1012	1	Zswim6	0.512503	0.526	0.163	1.06e-47	1.63e-43	zinc finger SWIM-type containing 6 [Source:MGI Symbol;Acc:MGI:1914513]
1013	1	Bst1	0.353553	0.27	0.035	1.68e-47	2.58e-43	bone marrow stromal cell antigen 1 [Source:MGI Symbol;Acc:MGI:105370]
1014	1	H2-Eb1	0.635037	0.809	0.311	3.87e-47	5.95e-43	histocompatibility 2, class II antigen E beta [Source:MGI Symbol;Acc:MGI:95901]
1015	1	Fbxw4	0.386474	0.359	0.076	5.52e-47	8.48e-43	F-box and WD-40 domain protein 4 [Source:MGI Symbol;Acc:MGI:1354698]
1016	1	Snx30	0.494116	0.444	0.122	7.23e-47	1.11e-42	sorting nexin family member 30 [Source:MGI Symbol;Acc:MGI:2443882]
1017	1	Hpgd	0.61734	0.651	0.254	9.15e-47	1.41e-42	hydroxyprostaglandin dehydrogenase 15 (NAD) [Source:MGI Symbol;Acc:MGI:108085]
1018	1	Mapk14	0.568523	0.595	0.236	1.17e-46	1.79e-42	mitogen-activated protein kinase 14 [Source:MGI Symbol;Acc:MGI:1346865]
1019	1	Ctla2b	0.391455	0.451	0.108	5.62e-46	8.64e-42	cytotoxic T lymphocyte-associated protein 2 beta [Source:MGI Symbol;Acc:MGI:88555]
1020	1	Nrp1	0.445661	0.961	0.586	8.18e-46	1.26e-41	neuropilin 1 [Source:MGI Symbol;Acc:MGI:106206]
1021	1	Mfsd1	0.543728	0.586	0.225	1.31e-45	2.01e-41	major facilitator superfamily domain containing 1 [Source:MGI Symbol;Acc:MGI:1914118]
1022	1	Calm2	0.487564	0.987	0.806	2.85e-45	4.39e-41	calmodulin 2 [Source:MGI Symbol;Acc:MGI:103250]
1023	1	Gng2	0.448514	0.562	0.175	3.12e-45	4.8e-41	guanine nucleotide binding protein (G protein), gamma 2 [Source:MGI Symbol;Acc:MGI:102705]
1024	1	Nfkbiz	0.75011	0.868	0.562	3.19e-45	4.91e-41	nuclear factor of kappa light polypeptide gene enhancer in B cells inhibitor, zeta [Source:MGI Symbol;Acc:MGI:1931595]
1025	1	Rassf2	0.520942	0.516	0.175	6.95e-45	1.07e-40	Ras association (RalGDS/AF-6) domain family member 2 [Source:MGI Symbol;Acc:MGI:2442060]
1026	1	Snx29	0.408827	0.332	0.065	1.24e-44	1.91e-40	sorting nexin 29 [Source:MGI Symbol;Acc:MGI:1921728]
1027	1	Fkbp15	0.399734	0.461	0.132	1.39e-44	2.13e-40	FK506 binding protein 15 [Source:MGI Symbol;Acc:MGI:2444782]
1028	1	Prkcb	0.321849	0.312	0.053	1.41e-44	2.17e-40	protein kinase C, beta [Source:MGI Symbol;Acc:MGI:97596]
1029	1	Adam30	0.322717	0.266	0.039	2.39e-44	3.67e-40	a disintegrin and metallopeptidase domain 30 [Source:MGI Symbol;Acc:MGI:1918328]
1030	1	Ptgs1	0.465634	0.484	0.148	2.73e-44	4.19e-40	prostaglandin-endoperoxide synthase 1 [Source:MGI Symbol;Acc:MGI:97797]
1031	1	Reps2	0.493093	0.401	0.103	2.92e-44	4.48e-40	RALBP1 associated Eps domain containing protein 2 [Source:MGI Symbol;Acc:MGI:2663511]
1032	1	Pitpna	0.519376	0.878	0.544	4.87e-44	7.49e-40	phosphatidylinositol transfer protein, alpha [Source:MGI Symbol;Acc:MGI:99887]
1033	1	Gpx1	0.467464	0.98	0.76	5.12e-44	7.86e-40	glutathione peroxidase 1 [Source:MGI Symbol;Acc:MGI:104887]
1034	1	Tns1	0.566156	0.822	0.449	5.97e-44	9.17e-40	tensin 1 [Source:MGI Symbol;Acc:MGI:104552]
1035	1	Rell1	0.473812	0.539	0.184	8.99e-44	1.38e-39	RELT-like 1 [Source:MGI Symbol;Acc:MGI:2140767]
1036	1	Klhl9	0.52428	0.546	0.203	1.66e-43	2.55e-39	kelch-like 9 [Source:MGI Symbol;Acc:MGI:2180122]
1037	1	Irf2bp2	0.547887	0.743	0.392	2.63e-43	4.03e-39	interferon regulatory factor 2 binding protein 2 [Source:MGI Symbol;Acc:MGI:2443921]
1038	1	mt-Nd4	0.338059	0.997	0.977	3.02e-43	4.64e-39	mitochondrially encoded NADH dehydrogenase 4 [Source:MGI Symbol;Acc:MGI:102498]
1039	1	Tnfrsf11a	0.358661	0.316	0.06	3.97e-43	6.11e-39	tumor necrosis factor receptor superfamily, member 11a, NFKB activator [Source:MGI Symbol;Acc:MGI:1314891]
1040	1	Pikfyve	0.424041	0.434	0.124	3.98e-43	6.11e-39	phosphoinositide kinase, FYVE type zinc finger containing [Source:MGI Symbol;Acc:MGI:1335106]
1041	1	Clec12a	0.421744	0.513	0.148	5.48e-43	8.41e-39	C-type lectin domain family 12, member a [Source:MGI Symbol;Acc:MGI:3040968]
1042	1	Tm6sf1	0.482913	0.711	0.271	8.23e-43	1.26e-38	transmembrane 6 superfamily member 1 [Source:MGI Symbol;Acc:MGI:1933209]
1043	1	Aldh2	0.501559	0.947	0.632	1e-42	1.54e-38	aldehyde dehydrogenase 2, mitochondrial [Source:MGI Symbol;Acc:MGI:99600]
1044	1	Rnase4	0.68434	0.921	0.454	1.14e-42	1.75e-38	ribonuclease, RNase A family 4 [Source:MGI Symbol;Acc:MGI:1926217]
1045	1	Nfxl1	0.423125	0.326	0.068	1.17e-42	1.8e-38	nuclear transcription factor, X-box binding-like 1 [Source:MGI Symbol;Acc:MGI:1923646]
1046	1	Rhobtb1	0.348354	0.303	0.057	1.25e-42	1.92e-38	Rho-related BTB domain containing 1 [Source:MGI Symbol;Acc:MGI:1916538]
1047	1	Cndp2	0.537868	0.714	0.352	2.09e-42	3.21e-38	CNDP dipeptidase 2 (metallopeptidase M20 family) [Source:MGI Symbol;Acc:MGI:1913304]
1048	1	Nacc2	0.463047	0.428	0.126	2.85e-42	4.38e-38	nucleus accumbens associated 2, BEN and BTB (POZ) domain containing [Source:MGI Symbol;Acc:MGI:1915241]
1049	1	P2rx7	0.400446	0.332	0.07	4.6e-42	7.07e-38	purinergic receptor P2X, ligand-gated ion channel, 7 [Source:MGI Symbol;Acc:MGI:1339957]
1050	1	Irf8	0.266529	0.556	0.173	4.72e-42	7.26e-38	interferon regulatory factor 8 [Source:MGI Symbol;Acc:MGI:96395]
1051	1	Vamp8	0.531044	0.832	0.487	7.02e-42	1.08e-37	vesicle-associated membrane protein 8 [Source:MGI Symbol;Acc:MGI:1336882]
1052	1	Lst1	0.419371	0.431	0.115	8.07e-42	1.24e-37	leukocyte specific transcript 1 [Source:MGI Symbol;Acc:MGI:1096324]
1053	1	Slc12a7	0.365799	0.312	0.06	8.07e-42	1.24e-37	solute carrier family 12, member 7 [Source:MGI Symbol;Acc:MGI:1342283]
1054	1	Picalm	0.532071	0.859	0.552	1.06e-41	1.63e-37	phosphatidylinositol binding clathrin assembly protein [Source:MGI Symbol;Acc:MGI:2385902]
1055	1	Npc2	0.439819	0.99	0.771	1.88e-41	2.89e-37	NPC intracellular cholesterol transporter 2 [Source:MGI Symbol;Acc:MGI:1915213]
1056	1	Camk1	0.557345	0.707	0.372	2e-41	3.07e-37	calcium/calmodulin-dependent protein kinase I [Source:MGI Symbol;Acc:MGI:1098535]
1057	1	Cd40	0.340127	0.296	0.053	2.51e-41	3.85e-37	CD40 antigen [Source:MGI Symbol;Acc:MGI:88336]
1058	1	Kcnk13	0.3373	0.273	0.046	3.37e-41	5.19e-37	potassium channel, subfamily K, member 13 [Source:MGI Symbol;Acc:MGI:2384976]
1059	1	Rasgrp3	0.44095	0.401	0.1	4.13e-41	6.34e-37	RAS, guanyl releasing protein 3 [Source:MGI Symbol;Acc:MGI:3028579]
1060	1	Scamp2	0.581627	0.714	0.387	5.39e-41	8.28e-37	secretory carrier membrane protein 2 [Source:MGI Symbol;Acc:MGI:1346518]
1061	1	Arhgap30	0.437993	0.559	0.189	1.38e-40	2.11e-36	Rho GTPase activating protein 30 [Source:MGI Symbol;Acc:MGI:2684948]
1062	1	Rcn3	0.673241	0.671	0.333	1.63e-40	2.51e-36	reticulocalbin 3, EF-hand calcium binding domain [Source:MGI Symbol;Acc:MGI:1277122]
1063	1	St6gal1	0.409401	0.339	0.077	2.22e-40	3.41e-36	beta galactoside alpha 2,6 sialyltransferase 1 [Source:MGI Symbol;Acc:MGI:108470]
1064	1	Ifi27l2a	0.560944	0.882	0.537	2.9e-40	4.45e-36	interferon, alpha-inducible protein 27 like 2A [Source:MGI Symbol;Acc:MGI:1924183]
1065	1	Plekho1	0.510722	0.648	0.272	4.06e-40	6.23e-36	pleckstrin homology domain containing, family O member 1 [Source:MGI Symbol;Acc:MGI:1914470]
1066	1	Fgfr1	0.574195	0.776	0.418	4.12e-40	6.33e-36	fibroblast growth factor receptor 1 [Source:MGI Symbol;Acc:MGI:95522]
1067	1	Il10ra	0.412125	0.408	0.107	5.62e-40	8.63e-36	interleukin 10 receptor, alpha [Source:MGI Symbol;Acc:MGI:96538]
1068	1	Nfatc2	0.321235	0.349	0.08	6.83e-40	1.05e-35	nuclear factor of activated T cells, cytoplasmic, calcineurin dependent 2 [Source:MGI Symbol;Acc:MGI:102463]
1069	1	H2-DMa	0.335801	0.711	0.245	1.5e-39	2.31e-35	histocompatibility 2, class II, locus DMa [Source:MGI Symbol;Acc:MGI:95921]
1070	1	Lamp2	0.496549	0.951	0.662	1.54e-39	2.37e-35	lysosomal-associated membrane protein 2 [Source:MGI Symbol;Acc:MGI:96748]
1071	1	Asah1	0.505957	0.763	0.446	2.81e-39	4.31e-35	N-acylsphingosine amidohydrolase 1 [Source:MGI Symbol;Acc:MGI:1277124]
1072	1	Cd300a	0.337201	0.516	0.156	3.62e-39	5.56e-35	CD300A molecule [Source:MGI Symbol;Acc:MGI:2443411]
1073	1	Man1c1	0.479755	0.428	0.136	4.19e-39	6.44e-35	mannosidase, alpha, class 1C, member 1 [Source:MGI Symbol;Acc:MGI:2446214]
1074	1	Maoa	0.367155	0.395	0.112	4.64e-39	7.13e-35	monoamine oxidase A [Source:MGI Symbol;Acc:MGI:96915]
1075	1	Tgfb1	0.499245	0.78	0.389	8.14e-39	1.25e-34	transforming growth factor, beta 1 [Source:MGI Symbol;Acc:MGI:98725]
1076	1	Ophn1	0.37879	0.414	0.121	1.29e-38	1.98e-34	oligophrenin 1 [Source:MGI Symbol;Acc:MGI:2151070]
1077	1	Zfhx3	0.518255	0.579	0.246	1.93e-38	2.96e-34	zinc finger homeobox 3 [Source:MGI Symbol;Acc:MGI:99948]
1078	1	Slfn2	0.328387	0.674	0.237	1.95e-38	3e-34	schlafen 2 [Source:MGI Symbol;Acc:MGI:1313258]
1079	1	Slfn2	0.328387	0.674	0.237	1.95e-38	3e-34	schlafen 2 [Source:NCBI gene;Acc:20556]
1080	1	Arap1	0.458407	0.503	0.184	2.1e-38	3.23e-34	ArfGAP with RhoGAP domain, ankyrin repeat and PH domain 1 [Source:MGI Symbol;Acc:MGI:1916960]
1081	1	Hmox2	0.498238	0.618	0.281	2.16e-38	3.31e-34	heme oxygenase 2 [Source:MGI Symbol;Acc:MGI:109373]
1082	1	Igsf6	0.358066	0.401	0.105	2.51e-38	3.86e-34	immunoglobulin superfamily, member 6 [Source:MGI Symbol;Acc:MGI:1891393]
1083	1	Abcc1	0.451794	0.477	0.169	2.55e-38	3.92e-34	ATP-binding cassette, sub-family C (CFTR/MRP), member 1 [Source:MGI Symbol;Acc:MGI:102676]
1084	1	Tns3	0.440219	0.434	0.132	2.57e-38	3.94e-34	tensin 3 [Source:MGI Symbol;Acc:MGI:2443012]
1085	1	Selplg	0.310821	0.641	0.235	2.7e-38	4.14e-34	selectin, platelet (p-selectin) ligand [Source:MGI Symbol;Acc:MGI:106689]
1086	1	Hpse	0.351861	0.319	0.071	4.05e-38	6.23e-34	heparanase [Source:MGI Symbol;Acc:MGI:1343124]
1087	1	Atp6ap2	0.500768	0.75	0.419	4.31e-38	6.63e-34	ATPase, H+ transporting, lysosomal accessory protein 2 [Source:MGI Symbol;Acc:MGI:1917745]
1088	1	Plxnb2	0.499095	0.635	0.313	1.25e-37	1.93e-33	plexin B2 [Source:MGI Symbol;Acc:MGI:2154239]
1089	1	Slc7a8	0.344988	0.339	0.082	1.34e-37	2.06e-33	solute carrier family 7 (cationic amino acid transporter, y+ system), member 8 [Source:MGI Symbol;Acc:MGI:1355323]
1090	1	Clec4a2	0.372232	0.516	0.16	2.86e-37	4.39e-33	C-type lectin domain family 4, member a2 [Source:MGI Symbol;Acc:MGI:1349412]
1091	1	Kansl1l	0.393016	0.461	0.153	3.67e-37	5.64e-33	KAT8 regulatory NSL complex subunit 1-like [Source:MGI Symbol;Acc:MGI:1915941]
1092	1	Slc8b1	0.386198	0.378	0.106	5.25e-37	8.07e-33	solute carrier family 8 (sodium/lithium/calcium exchanger), member B1 [Source:MGI Symbol;Acc:MGI:2180781]
1093	1	Dazap2	0.481136	0.819	0.479	5.99e-37	9.2e-33	DAZ associated protein 2 [Source:MGI Symbol;Acc:MGI:1344344]
1094	1	Zfp36l2	0.443023	0.914	0.654	1.33e-36	2.05e-32	zinc finger protein 36, C3H type-like 2 [Source:MGI Symbol;Acc:MGI:107945]
1095	1	Gm42418	0.374639	1	0.999	1.4e-36	2.14e-32	predicted gene, 42418 [Source:MGI Symbol;Acc:MGI:5649005]
1096	1	D1Ertd622e	0.391391	0.365	0.099	4.5e-36	6.91e-32	DNA segment, Chr 1, ERATO Doi 622, expressed [Source:MGI Symbol;Acc:MGI:1277184]
1097	1	Tnfaip8	0.368554	0.694	0.297	6.91e-36	1.06e-31	tumor necrosis factor, alpha-induced protein 8 [Source:MGI Symbol;Acc:MGI:2147191]
1098	1	Ly6e	0.631989	0.865	0.627	8.98e-36	1.38e-31	lymphocyte antigen 6 complex, locus E [Source:MGI Symbol;Acc:MGI:106651]
1099	1	Mpp6	0.355049	0.661	0.282	2.02e-35	3.1e-31	membrane protein, palmitoylated 6 (MAGUK p55 subfamily member 6) [Source:MGI Symbol;Acc:MGI:1927340]
1100	1	Txnip	0.410205	0.924	0.536	2.15e-35	3.31e-31	thioredoxin interacting protein [Source:MGI Symbol;Acc:MGI:1889549]
1101	1	Ifitm6	0.261711	0.326	0.073	3.19e-35	4.89e-31	interferon induced transmembrane protein 6 [Source:MGI Symbol;Acc:MGI:2686976]
1102	1	Vps18	0.363194	0.329	0.082	5.37e-35	8.25e-31	VPS18 CORVET/HOPS core subunit [Source:MGI Symbol;Acc:MGI:2443626]
1103	1	Wsb1	0.553577	0.806	0.526	1.34e-34	2.06e-30	WD repeat and SOCS box-containing 1 [Source:MGI Symbol;Acc:MGI:1926139]
1104	1	Nrp2	0.426034	0.605	0.259	1.51e-34	2.31e-30	neuropilin 2 [Source:MGI Symbol;Acc:MGI:1100492]
1105	1	Sgpp1	0.499688	0.444	0.163	2.7e-34	4.15e-30	sphingosine-1-phosphate phosphatase 1 [Source:MGI Symbol;Acc:MGI:2135760]
1106	1	Gpr183	0.347844	0.286	0.06	5.85e-34	8.98e-30	G protein-coupled receptor 183 [Source:MGI Symbol;Acc:MGI:2442034]
1107	1	Tagap	0.375039	0.276	0.058	5.99e-34	9.2e-30	T cell activation Rho GTPase activating protein [Source:MGI Symbol;Acc:MGI:3615484]
1108	1	Sh3bgrl	0.451338	0.826	0.55	7.58e-34	1.16e-29	SH3-binding domain glutamic acid-rich protein like [Source:MGI Symbol;Acc:MGI:1930849]
1109	1	Cited2	0.532395	0.727	0.387	8.67e-34	1.33e-29	Cbp/p300-interacting transactivator, with Glu/Asp-rich carboxy-terminal domain, 2 [Source:MGI Symbol;Acc:MGI:1306784]
1110	1	Pip4k2a	0.387795	0.595	0.251	1.03e-33	1.58e-29	phosphatidylinositol-5-phosphate 4-kinase, type II, alpha [Source:MGI Symbol;Acc:MGI:1298206]
1111	1	Ehbp1l1	0.450397	0.52	0.215	1.46e-33	2.25e-29	EH domain binding protein 1-like 1 [Source:MGI Symbol;Acc:MGI:3612340]
1112	1	Ifi30	0.368391	0.766	0.392	1.51e-33	2.33e-29	interferon gamma inducible protein 30 [Source:MGI Symbol;Acc:MGI:2137648]
1113	1	Ifi30	0.368391	0.766	0.392	1.51e-33	2.33e-29	Gamma-interferon-inducible lysosomal thiol reductase [Source:UniProtKB/Swiss-Prot;Acc:Q9ESY9]
1114	1	Themis2	0.28417	0.293	0.066	1.63e-33	2.5e-29	thymocyte selection associated family member 2 [Source:MGI Symbol;Acc:MGI:2446213]
1115	1	Rap1b	0.389889	0.924	0.713	4.51e-33	6.94e-29	RAS related protein 1b [Source:MGI Symbol;Acc:MGI:894315]
1116	1	Igfbp4	0.365179	0.914	0.489	5.44e-33	8.35e-29	insulin-like growth factor binding protein 4 [Source:MGI Symbol;Acc:MGI:96439]
1117	1	Dip2b	0.434766	0.421	0.149	5.67e-33	8.71e-29	disco interacting protein 2 homolog B [Source:MGI Symbol;Acc:MGI:2145977]
1118	1	Mgat1	0.46998	0.618	0.307	7.59e-33	1.17e-28	mannoside acetylglucosaminyltransferase 1 [Source:MGI Symbol;Acc:MGI:96973]
1119	1	Snx3	0.445827	0.862	0.637	8.3e-33	1.28e-28	sorting nexin 3 [Source:MGI Symbol;Acc:MGI:1860188]
1120	1	AI662270	0.375206	0.474	0.159	8.72e-33	1.34e-28	expressed sequence AI662270 [Source:MGI Symbol;Acc:MGI:2144254]
1121	1	Fam49b	0.305415	0.668	0.284	8.78e-33	1.35e-28	family with sequence similarity 49, member B [Source:MGI Symbol;Acc:MGI:1923520]
1122	1	Tslp	0.325386	0.257	0.053	9.8e-33	1.51e-28	thymic stromal lymphopoietin [Source:MGI Symbol;Acc:MGI:1855696]
1123	1	Pea15a	0.451402	0.73	0.419	1.21e-32	1.86e-28	phosphoprotein enriched in astrocytes 15A [Source:MGI Symbol;Acc:MGI:104799]
1124	1	Hspa1a	0.577228	0.556	0.251	1.22e-32	1.87e-28	heat shock protein 1A [Source:MGI Symbol;Acc:MGI:96244]
1125	1	Clcn5	0.400017	0.434	0.156	1.29e-32	1.99e-28	chloride channel, voltage-sensitive 5 [Source:MGI Symbol;Acc:MGI:99486]
1126	1	2610507B11Rik	0.433167	0.569	0.262	1.6e-32	2.46e-28	RIKEN cDNA 2610507B11 gene [Source:MGI Symbol;Acc:MGI:1919753]
1127	1	Dnajc13	0.438978	0.523	0.227	2.94e-32	4.51e-28	DnaJ heat shock protein family (Hsp40) member C13 [Source:MGI Symbol;Acc:MGI:2676368]
1128	1	Rab7b	0.501429	0.622	0.287	3.24e-32	4.98e-28	RAB7B, member RAS oncogene family [Source:MGI Symbol;Acc:MGI:2442295]
1129	1	Dock2	0.307499	0.609	0.23	5.85e-32	8.99e-28	dedicator of cyto-kinesis 2 [Source:MGI Symbol;Acc:MGI:2149010]
1130	1	Plxnc1	0.314112	0.283	0.065	8.59e-32	1.32e-27	plexin C1 [Source:MGI Symbol;Acc:MGI:1890127]
1131	1	Mfsd6	0.385917	0.385	0.123	9.33e-32	1.43e-27	major facilitator superfamily domain containing 6 [Source:MGI Symbol;Acc:MGI:1922925]
1132	1	Synj1	0.389258	0.526	0.221	1.02e-31	1.56e-27	synaptojanin 1 [Source:MGI Symbol;Acc:MGI:1354961]
1133	1	Ptpn6	0.36198	0.457	0.152	1.03e-31	1.58e-27	protein tyrosine phosphatase, non-receptor type 6 [Source:MGI Symbol;Acc:MGI:96055]
1134	1	Rin2	0.483682	0.477	0.197	1.29e-31	1.98e-27	Ras and Rab interactor 2 [Source:MGI Symbol;Acc:MGI:1921280]
1135	1	Blnk	0.342909	0.401	0.123	1.32e-31	2.03e-27	B cell linker [Source:MGI Symbol;Acc:MGI:96878]
1136	1	Il10rb	0.416365	0.615	0.293	1.47e-31	2.26e-27	interleukin 10 receptor, beta [Source:MGI Symbol;Acc:MGI:109380]
1137	1	Tpcn1	0.379841	0.378	0.123	1.9e-31	2.92e-27	two pore channel 1 [Source:MGI Symbol;Acc:MGI:2182472]
1138	1	Rac3	0.319118	0.253	0.053	1.94e-31	2.98e-27	Rac family small GTPase 3 [Source:MGI Symbol;Acc:MGI:2180784]
1139	1	Itgb2	0.262738	0.582	0.212	2.06e-31	3.16e-27	integrin beta 2 [Source:MGI Symbol;Acc:MGI:96611]
1140	1	Dvl2	0.319907	0.27	0.062	2.39e-31	3.67e-27	dishevelled segment polarity protein 2 [Source:MGI Symbol;Acc:MGI:106613]
1141	1	Serpinb6a	0.497256	0.951	0.653	2.93e-31	4.51e-27	serine (or cysteine) peptidase inhibitor, clade B, member 6a [Source:MGI Symbol;Acc:MGI:103123]
1142	1	Bmp2	0.329041	0.263	0.058	3.05e-31	4.69e-27	bone morphogenetic protein 2 [Source:MGI Symbol;Acc:MGI:88177]
1143	1	Gm6377	0.412043	0.312	0.081	5.22e-31	8.02e-27	predicted gene 6377 [Source:MGI Symbol;Acc:MGI:3647255]
1144	1	Fermt3	0.313848	0.49	0.169	9.85e-31	1.51e-26	fermitin family member 3 [Source:MGI Symbol;Acc:MGI:2147790]
1145	1	Slc45a4	0.325281	0.299	0.078	1.17e-30	1.8e-26	solute carrier family 45, member 4 [Source:MGI Symbol;Acc:MGI:2146236]
1146	1	Epb41l1	0.372653	0.378	0.127	1.22e-30	1.88e-26	erythrocyte membrane protein band 4.1 like 1 [Source:MGI Symbol;Acc:MGI:103010]
1147	1	Sdcbp	0.388015	0.924	0.667	1.46e-30	2.25e-26	syndecan binding protein [Source:MGI Symbol;Acc:MGI:1337026]
1148	1	Ctnnd1	0.427328	0.513	0.22	1.51e-30	2.33e-26	catenin (cadherin associated protein), delta 1 [Source:MGI Symbol;Acc:MGI:105100]
1149	1	Rbm47	0.278183	0.26	0.056	1.86e-30	2.85e-26	RNA binding motif protein 47 [Source:MGI Symbol;Acc:MGI:2384294]
1150	1	Sesn1	0.365056	0.319	0.091	2.55e-30	3.92e-26	sestrin 1 [Source:MGI Symbol;Acc:MGI:2155278]
1151	1	Map3k8	0.425785	0.48	0.195	3.05e-30	4.68e-26	mitogen-activated protein kinase kinase kinase 8 [Source:MGI Symbol;Acc:MGI:1346878]
1152	1	Scpep1	0.435927	0.553	0.26	3.79e-30	5.83e-26	serine carboxypeptidase 1 [Source:MGI Symbol;Acc:MGI:1921867]
1153	1	Rcsd1	0.31588	0.408	0.133	5.38e-30	8.27e-26	RCSD domain containing 1 [Source:MGI Symbol;Acc:MGI:2676394]
1154	1	P2rx4	0.41928	0.592	0.287	5.57e-30	8.56e-26	purinergic receptor P2X, ligand-gated ion channel 4 [Source:MGI Symbol;Acc:MGI:1338859]
1155	1	Ubc	0.344681	1	0.942	7.16e-30	1.1e-25	ubiquitin C [Source:MGI Symbol;Acc:MGI:98889]
1156	1	Slc16a6	0.281841	0.289	0.071	7.17e-30	1.1e-25	solute carrier family 16 (monocarboxylic acid transporters), member 6 [Source:MGI Symbol;Acc:MGI:2144585]
1157	1	Arl11	0.275974	0.26	0.057	7.99e-30	1.23e-25	ADP-ribosylation factor-like 11 [Source:MGI Symbol;Acc:MGI:2444054]
1158	1	Myo7a	0.298598	0.253	0.057	1.33e-29	2.04e-25	myosin VIIA [Source:MGI Symbol;Acc:MGI:104510]
1159	1	Tfe3	0.384283	0.48	0.197	1.61e-29	2.47e-25	transcription factor E3 [Source:MGI Symbol;Acc:MGI:98511]
1160	1	Susd3	0.295503	0.303	0.079	1.79e-29	2.75e-25	sushi domain containing 3 [Source:MGI Symbol;Acc:MGI:1913579]
1161	1	Fchsd2	0.339163	0.336	0.1	2.74e-29	4.21e-25	FCH and double SH3 domains 2 [Source:MGI Symbol;Acc:MGI:2448475]
1162	1	Ppp1r21	0.394756	0.359	0.121	3.15e-29	4.84e-25	protein phosphatase 1, regulatory subunit 21 [Source:MGI Symbol;Acc:MGI:1921075]
1163	1	Lrrc25	0.29253	0.336	0.098	3.59e-29	5.51e-25	leucine rich repeat containing 25 [Source:MGI Symbol;Acc:MGI:2445284]
1164	1	Ccr5	0.359081	0.345	0.101	3.72e-29	5.71e-25	chemokine (C-C motif) receptor 5 [Source:MGI Symbol;Acc:MGI:107182]
1165	1	Pros1	0.455587	0.671	0.385	4.9e-29	7.53e-25	protein S (alpha) [Source:MGI Symbol;Acc:MGI:1095733]
1166	1	Nfkbia	0.435319	0.957	0.792	5.68e-29	8.73e-25	nuclear factor of kappa light polypeptide gene enhancer in B cells inhibitor, alpha [Source:MGI Symbol;Acc:MGI:104741]
1167	1	Nhlrc3	0.307879	0.273	0.068	7.96e-29	1.22e-24	NHL repeat containing 3 [Source:MGI Symbol;Acc:MGI:2444520]
1168	1	Dnase1l1	0.324055	0.372	0.122	8.54e-29	1.31e-24	deoxyribonuclease 1-like 1 [Source:MGI Symbol;Acc:MGI:109628]
1169	1	Hfe	0.334926	0.533	0.238	1.71e-28	2.63e-24	homeostatic iron regulator [Source:MGI Symbol;Acc:MGI:109191]
1170	1	Hexim1	0.529584	0.704	0.419	4.14e-28	6.36e-24	hexamethylene bis-acetamide inducible 1 [Source:MGI Symbol;Acc:MGI:2385923]
1171	1	Atp6v1a	0.428987	0.602	0.316	1.2e-27	1.84e-23	ATPase, H+ transporting, lysosomal V1 subunit A [Source:MGI Symbol;Acc:MGI:1201780]
1172	1	Wdfy3	0.387026	0.457	0.195	1.41e-27	2.17e-23	WD repeat and FYVE domain containing 3 [Source:MGI Symbol;Acc:MGI:1096875]
1173	1	Gna12	0.413793	0.526	0.253	1.46e-27	2.24e-23	guanine nucleotide binding protein, alpha 12 [Source:MGI Symbol;Acc:MGI:95767]
1174	1	Cd84	0.290063	0.464	0.164	2.69e-27	4.13e-23	CD84 antigen [Source:MGI Symbol;Acc:MGI:1336885]
1175	1	Slc25a37	0.331016	0.296	0.085	3.26e-27	5.01e-23	solute carrier family 25, member 37 [Source:MGI Symbol;Acc:MGI:1914962]
1176	1	Gapvd1	0.336781	0.599	0.315	3.26e-27	5.02e-23	GTPase activating protein and VPS9 domains 1 [Source:MGI Symbol;Acc:MGI:1913941]
1177	1	Cxcr4	0.315374	0.375	0.122	4.51e-27	6.93e-23	chemokine (C-X-C motif) receptor 4 [Source:MGI Symbol;Acc:MGI:109563]
1178	1	Ap2s1	0.455465	0.691	0.444	7.78e-27	1.2e-22	adaptor-related protein complex 2, sigma 1 subunit [Source:MGI Symbol;Acc:MGI:2141861]
1179	1	Casp4	0.449694	0.533	0.251	8.01e-27	1.23e-22	caspase 4, apoptosis-related cysteine peptidase [Source:MGI Symbol;Acc:MGI:107700]
1180	1	Inpp5d	0.285661	0.405	0.14	1.34e-26	2.06e-22	inositol polyphosphate-5-phosphatase D [Source:MGI Symbol;Acc:MGI:107357]
1181	1	Stxbp2	0.277114	0.293	0.082	1.71e-26	2.63e-22	syntaxin binding protein 2 [Source:MGI Symbol;Acc:MGI:107370]
1182	1	Prkacb	0.34244	0.52	0.245	2.11e-26	3.25e-22	protein kinase, cAMP dependent, catalytic, beta [Source:MGI Symbol;Acc:MGI:97594]
1183	1	Snap23	0.375004	0.543	0.269	2.43e-26	3.73e-22	synaptosomal-associated protein 23 [Source:MGI Symbol;Acc:MGI:109356]
1184	1	Blvra	0.37214	0.533	0.256	5.6e-26	8.61e-22	biliverdin reductase A [Source:MGI Symbol;Acc:MGI:88170]
1185	1	Card19	0.446309	0.612	0.339	6.45e-26	9.91e-22	caspase recruitment domain family, member 19 [Source:MGI Symbol;Acc:MGI:1915730]
1186	1	Hip1	0.333988	0.497	0.216	7.22e-26	1.11e-21	huntingtin interacting protein 1 [Source:MGI Symbol;Acc:MGI:1099804]
1187	1	Dgkd	0.331665	0.405	0.152	9.08e-26	1.4e-21	diacylglycerol kinase, delta [Source:MGI Symbol;Acc:MGI:2138334]
1188	1	Casp1	0.316439	0.339	0.112	1.29e-25	1.99e-21	caspase 1 [Source:MGI Symbol;Acc:MGI:96544]
1189	1	Arhgap9	0.293254	0.345	0.11	1.31e-25	2.01e-21	Rho GTPase activating protein 9 [Source:MGI Symbol;Acc:MGI:2143764]
1190	1	Samhd1	0.352013	0.727	0.436	1.46e-25	2.25e-21	SAM domain and HD domain, 1 [Source:MGI Symbol;Acc:MGI:1927468]
1191	1	Crip1	0.283136	0.98	0.876	1.81e-25	2.78e-21	cysteine-rich protein 1 (intestinal) [Source:MGI Symbol;Acc:MGI:88501]
1192	1	Emp1	0.47784	0.737	0.425	2.05e-25	3.15e-21	epithelial membrane protein 1 [Source:MGI Symbol;Acc:MGI:107941]
1193	1	Slc35f6	0.285313	0.329	0.108	2.19e-25	3.36e-21	solute carrier family 35, member F6 [Source:MGI Symbol;Acc:MGI:1922169]
1194	1	Tspan32	0.281306	0.253	0.064	3.68e-25	5.65e-21	tetraspanin 32 [Source:MGI Symbol;Acc:MGI:1350360]
1195	1	Usp24	0.340957	0.418	0.173	3.95e-25	6.06e-21	ubiquitin specific peptidase 24 [Source:MGI Symbol;Acc:MGI:1919936]
1196	1	Klf10	0.351334	0.411	0.165	4.41e-25	6.78e-21	Kruppel-like factor 10 [Source:MGI Symbol;Acc:MGI:1101353]
1197	1	Mob1a	0.35841	0.681	0.401	6.3e-25	9.69e-21	MOB kinase activator 1A [Source:MGI Symbol;Acc:MGI:2442631]
1198	1	Cyfip1	0.407646	0.78	0.528	9.55e-25	1.47e-20	cytoplasmic FMR1 interacting protein 1 [Source:MGI Symbol;Acc:MGI:1338801]
1199	1	Arl4c	0.262066	0.388	0.133	1.54e-24	2.37e-20	ADP-ribosylation factor-like 4C [Source:MGI Symbol;Acc:MGI:2445172]
1200	1	Mcl1	0.370567	0.97	0.797	1.78e-24	2.73e-20	myeloid cell leukemia sequence 1 [Source:MGI Symbol;Acc:MGI:101769]
1201	1	Osbpl9	0.367979	0.572	0.309	1.85e-24	2.85e-20	oxysterol binding protein-like 9 [Source:MGI Symbol;Acc:MGI:1923784]
1202	1	Rab5c	0.33522	0.793	0.532	1.9e-24	2.92e-20	RAB5C, member RAS oncogene family [Source:MGI Symbol;Acc:MGI:105306]
1203	1	Tgfbr2	0.313183	0.819	0.484	2.2e-24	3.39e-20	transforming growth factor, beta receptor II [Source:MGI Symbol;Acc:MGI:98729]
1204	1	Shtn1	0.311161	0.372	0.132	3.48e-24	5.34e-20	shootin 1 [Source:MGI Symbol;Acc:MGI:1918903]
1205	1	Cmtm6	0.362244	0.536	0.269	3.49e-24	5.36e-20	CKLF-like MARVEL transmembrane domain containing 6 [Source:MGI Symbol;Acc:MGI:2447165]
1206	1	Lpin1	0.267332	0.326	0.108	7.79e-24	1.2e-19	lipin 1 [Source:MGI Symbol;Acc:MGI:1891340]
1207	1	Pycard	0.30619	0.658	0.342	1.08e-23	1.66e-19	PYD and CARD domain containing [Source:MGI Symbol;Acc:MGI:1931465]
1208	1	Nagk	0.340871	0.49	0.24	1.22e-23	1.87e-19	N-acetylglucosamine kinase [Source:MGI Symbol;Acc:MGI:1860418]
1209	1	Rab8b	0.33891	0.576	0.297	1.22e-23	1.87e-19	RAB8B, member RAS oncogene family [Source:MGI Symbol;Acc:MGI:2442982]
1210	1	Fam111a	0.384482	0.516	0.258	1.58e-23	2.43e-19	family with sequence similarity 111, member A [Source:MGI Symbol;Acc:MGI:1915508]
1211	1	Mitf	0.363	0.385	0.156	1.94e-23	2.98e-19	melanogenesis associated transcription factor [Source:MGI Symbol;Acc:MGI:104554]
1212	1	Marcks	0.336102	0.957	0.672	3.16e-23	4.86e-19	myristoylated alanine rich protein kinase C substrate [Source:MGI Symbol;Acc:MGI:96907]
1213	1	Skap2	0.326578	0.664	0.372	3.58e-23	5.5e-19	src family associated phosphoprotein 2 [Source:MGI Symbol;Acc:MGI:1889206]
1214	1	Raph1	0.418131	0.592	0.33	3.98e-23	6.12e-19	Ras association (RalGDS/AF-6) and pleckstrin homology domains 1 [Source:MGI Symbol;Acc:MGI:1924550]
1215	1	Bmp2k	0.303634	0.444	0.197	4.01e-23	6.15e-19	BMP2 inducible kinase [Source:MGI Symbol;Acc:MGI:2155456]
1216	1	Rfk	0.33274	0.388	0.16	6.61e-23	1.02e-18	riboflavin kinase [Source:MGI Symbol;Acc:MGI:1914688]
1217	1	Renbp	0.362039	0.405	0.175	1.25e-22	1.92e-18	renin binding protein [Source:MGI Symbol;Acc:MGI:105940]
1218	1	Sgk3	0.281359	0.345	0.127	1.58e-22	2.42e-18	serum/glucocorticoid regulated kinase 3 [Source:MGI Symbol;Acc:MGI:2182368]
1219	1	Nufip2	0.386669	0.724	0.497	2.41e-22	3.7e-18	nuclear fragile X mental retardation protein interacting protein 2 [Source:MGI Symbol;Acc:MGI:1915814]
1220	1	Herc4	0.280196	0.332	0.119	2.53e-22	3.89e-18	hect domain and RLD 4 [Source:MGI Symbol;Acc:MGI:1914595]
1221	1	Brd2	0.367356	0.826	0.584	2.55e-22	3.91e-18	bromodomain containing 2 [Source:MGI Symbol;Acc:MGI:99495]
1222	1	Ap1s2	0.326799	0.434	0.194	2.71e-22	4.17e-18	adaptor-related protein complex 1, sigma 2 subunit [Source:MGI Symbol;Acc:MGI:1889383]
1223	1	mt-Nd3	0.296944	0.993	0.911	3.38e-22	5.2e-18	mitochondrially encoded NADH dehydrogenase 3 [Source:MGI Symbol;Acc:MGI:102499]
1224	1	Slamf9	0.285147	0.339	0.116	4.7e-22	7.22e-18	SLAM family member 9 [Source:MGI Symbol;Acc:MGI:1923692]
1225	1	Emp3	0.372127	0.977	0.72	5.05e-22	7.75e-18	epithelial membrane protein 3 [Source:MGI Symbol;Acc:MGI:1098729]
1226	1	Trim41	0.295921	0.349	0.136	6.43e-22	9.88e-18	tripartite motif-containing 41 [Source:MGI Symbol;Acc:MGI:2384814]
1227	1	Tmem189	0.295214	0.47	0.22	7.6e-22	1.17e-17	transmembrane protein 189 [Source:MGI Symbol;Acc:MGI:2142624]
1228	1	Dennd5a	0.331114	0.595	0.339	1.06e-21	1.63e-17	DENN/MADD domain containing 5A [Source:MGI Symbol;Acc:MGI:1201681]
1229	1	Rragc	0.339038	0.559	0.307	1.35e-21	2.08e-17	Ras-related GTP binding C [Source:MGI Symbol;Acc:MGI:1858751]
1230	1	Mat2a	0.381459	0.898	0.678	1.38e-21	2.11e-17	methionine adenosyltransferase II, alpha [Source:MGI Symbol;Acc:MGI:2443731]
1231	1	Mepce	0.358557	0.457	0.219	1.7e-21	2.62e-17	methylphosphate capping enzyme [Source:MGI Symbol;Acc:MGI:106477]
1232	1	Notch2	0.330421	0.375	0.156	1.79e-21	2.76e-17	notch 2 [Source:MGI Symbol;Acc:MGI:97364]
1233	1	Arrb1	0.271557	0.355	0.141	1.9e-21	2.92e-17	arrestin, beta 1 [Source:MGI Symbol;Acc:MGI:99473]
1234	1	Sec11c	0.259425	0.684	0.395	2.06e-21	3.17e-17	SEC11 homolog C, signal peptidase complex subunit [Source:MGI Symbol;Acc:MGI:1913536]
1235	1	Hcls1	0.279558	0.516	0.232	2.73e-21	4.19e-17	hematopoietic cell specific Lyn substrate 1 [Source:MGI Symbol;Acc:MGI:104568]
1236	1	Ubap2l	0.432572	0.701	0.476	2.75e-21	4.23e-17	ubiquitin-associated protein 2-like [Source:MGI Symbol;Acc:MGI:1921633]
1237	1	Grb2	0.316861	0.694	0.436	2.83e-21	4.35e-17	growth factor receptor bound protein 2 [Source:MGI Symbol;Acc:MGI:95805]
1238	1	Plekhb2	0.30727	0.365	0.146	2.93e-21	4.51e-17	pleckstrin homology domain containing, family B (evectins) member 2 [Source:MGI Symbol;Acc:MGI:2385825]
1239	1	Rtn4	0.269394	0.941	0.695	3e-21	4.61e-17	reticulon 4 [Source:MGI Symbol;Acc:MGI:1915835]
1240	1	Plbd2	0.3399	0.47	0.237	3.12e-21	4.8e-17	phospholipase B domain containing 2 [Source:MGI Symbol;Acc:MGI:1919022]
1241	1	Egr2	0.490797	0.49	0.257	3.9e-21	5.99e-17	early growth response 2 [Source:MGI Symbol;Acc:MGI:95296]
1242	1	Ier5	0.391836	0.868	0.632	5.04e-21	7.75e-17	immediate early response 5 [Source:MGI Symbol;Acc:MGI:1337072]
1243	1	Ddx3x	0.383763	0.868	0.667	5.43e-21	8.35e-17	DEAD/H (Asp-Glu-Ala-Asp/His) box polypeptide 3, X-linked [Source:MGI Symbol;Acc:MGI:103064]
1244	1	Pld3	0.283012	0.451	0.204	6.74e-21	1.04e-16	phospholipase D family, member 3 [Source:MGI Symbol;Acc:MGI:1333782]
1245	1	Aplp2	0.260763	0.918	0.652	9.19e-21	1.41e-16	amyloid beta (A4) precursor-like protein 2 [Source:MGI Symbol;Acc:MGI:88047]
1246	1	Fh1	0.347713	0.497	0.256	1.24e-20	1.91e-16	fumarate hydratase 1 [Source:MGI Symbol;Acc:MGI:95530]
1247	1	Crlf2	0.32942	0.622	0.361	1.26e-20	1.94e-16	cytokine receptor-like factor 2 [Source:MGI Symbol;Acc:MGI:1889506]
1248	1	Tlr2	0.32507	0.382	0.152	1.27e-20	1.96e-16	toll-like receptor 2 [Source:MGI Symbol;Acc:MGI:1346060]
1249	1	Cbl	0.333978	0.549	0.299	1.52e-20	2.33e-16	Casitas B-lineage lymphoma [Source:MGI Symbol;Acc:MGI:88279]
1250	1	Runx1	0.381794	0.487	0.244	1.95e-20	3e-16	runt related transcription factor 1 [Source:MGI Symbol;Acc:MGI:99852]
1251	1	Dnajb9	0.347754	0.651	0.4	1.99e-20	3.06e-16	DnaJ heat shock protein family (Hsp40) member B9 [Source:MGI Symbol;Acc:MGI:1351618]
1252	1	Inpp5k	0.290558	0.375	0.159	2.08e-20	3.19e-16	inositol polyphosphate 5-phosphatase K [Source:MGI Symbol;Acc:MGI:1194899]
1253	1	Tpr	0.32475	0.898	0.723	2.24e-20	3.45e-16	translocated promoter region, nuclear basket protein [Source:MGI Symbol;Acc:MGI:1922066]
1254	1	Iqgap1	0.277222	0.921	0.692	2.4e-20	3.69e-16	IQ motif containing GTPase activating protein 1 [Source:MGI Symbol;Acc:MGI:1352757]
1255	1	Tgfbrap1	0.261567	0.27	0.091	2.82e-20	4.33e-16	transforming growth factor, beta receptor associated protein 1 [Source:MGI Symbol;Acc:MGI:2447427]
1256	1	Rp2	0.306076	0.342	0.136	3.04e-20	4.68e-16	retinitis pigmentosa 2 homolog [Source:MGI Symbol;Acc:MGI:1277953]
1257	1	Arhgap18	0.279088	0.615	0.336	3.2e-20	4.91e-16	Rho GTPase activating protein 18 [Source:MGI Symbol;Acc:MGI:1921160]
1258	1	Atp1a1	0.283301	0.727	0.457	3.26e-20	5e-16	ATPase, Na+/K+ transporting, alpha 1 polypeptide [Source:MGI Symbol;Acc:MGI:88105]
1259	1	Wdr26	0.319637	0.743	0.516	3.43e-20	5.26e-16	WD repeat domain 26 [Source:MGI Symbol;Acc:MGI:1923825]
1260	1	C1qtnf1	0.303064	0.359	0.149	4.67e-20	7.18e-16	C1q and tumor necrosis factor related protein 1 [Source:MGI Symbol;Acc:MGI:1919254]
1261	1	Canx	0.366377	0.839	0.612	5.13e-20	7.88e-16	calnexin [Source:MGI Symbol;Acc:MGI:88261]
1262	1	Arhgef6	0.276336	0.438	0.2	9.85e-20	1.51e-15	Rac/Cdc42 guanine nucleotide exchange factor (GEF) 6 [Source:MGI Symbol;Acc:MGI:1920591]
1263	1	Dusp1	0.383704	0.957	0.809	1.02e-19	1.57e-15	dual specificity phosphatase 1 [Source:MGI Symbol;Acc:MGI:105120]
1264	1	Clk1	0.302613	0.822	0.583	1.3e-19	2e-15	CDC-like kinase 1 [Source:MGI Symbol;Acc:MGI:107403]
1265	1	Mob3c	0.26158	0.352	0.142	1.36e-19	2.09e-15	MOB kinase activator 3C [Source:MGI Symbol;Acc:MGI:2140623]
1266	1	Nhsl2	0.276087	0.283	0.1	1.41e-19	2.16e-15	NHS-like 2 [Source:MGI Symbol;Acc:MGI:3645090]
1267	1	Akr1a1	0.318405	0.855	0.678	1.89e-19	2.91e-15	aldo-keto reductase family 1, member A1 (aldehyde reductase) [Source:MGI Symbol;Acc:MGI:1929955]
1268	1	Tob2	0.329156	0.734	0.476	2.07e-19	3.19e-15	transducer of ERBB2, 2 [Source:MGI Symbol;Acc:MGI:1888525]
1269	1	St6galnac4	0.296954	0.329	0.13	2.23e-19	3.42e-15	ST6 (alpha-N-acetyl-neuraminyl-2,3-beta-galactosyl-1,3)-N-acetylgalactosaminide alpha-2,6-sialyltransferase 4 [Source:MGI Symbol;Acc:MGI:1341894]
1270	1	Fam168b	0.290016	0.51	0.276	2.25e-19	3.46e-15	family with sequence similarity 168, member B [Source:MGI Symbol;Acc:MGI:2448487]
1271	1	Tsc22d4	0.303581	0.523	0.278	2.68e-19	4.12e-15	TSC22 domain family, member 4 [Source:MGI Symbol;Acc:MGI:1926079]
1272	1	Dnmt3a	0.309677	0.434	0.203	3.55e-19	5.46e-15	DNA methyltransferase 3A [Source:MGI Symbol;Acc:MGI:1261827]
1273	1	Akr1b3	0.31006	0.661	0.425	3.67e-19	5.64e-15	aldo-keto reductase family 1, member B3 (aldose reductase) [Source:MGI Symbol;Acc:MGI:1353494]
1274	1	Zfp710	0.283641	0.306	0.116	4.39e-19	6.75e-15	zinc finger protein 710 [Source:MGI Symbol;Acc:MGI:1921747]
1275	1	Zfp106	0.332715	0.549	0.313	4.76e-19	7.32e-15	zinc finger protein 106 [Source:MGI Symbol;Acc:MGI:1270153]
1276	1	Npc1	0.276327	0.401	0.181	5.25e-19	8.07e-15	NPC intracellular cholesterol transporter 1 [Source:MGI Symbol;Acc:MGI:1097712]
1277	1	Comt	0.271826	0.697	0.454	5.28e-19	8.12e-15	catechol-O-methyltransferase [Source:MGI Symbol;Acc:MGI:88470]
1278	1	Fcho2	0.260526	0.543	0.295	6.46e-19	9.92e-15	FCH domain only 2 [Source:MGI Symbol;Acc:MGI:3505790]
1279	1	Atp6v0a1	0.291351	0.359	0.153	6.6e-19	1.01e-14	ATPase, H+ transporting, lysosomal V0 subunit A1 [Source:MGI Symbol;Acc:MGI:103286]
1280	1	Arrdc3	0.267205	0.28	0.097	6.82e-19	1.05e-14	arrestin domain containing 3 [Source:MGI Symbol;Acc:MGI:2145242]
1281	1	Klf6	0.374572	0.974	0.749	8.54e-19	1.31e-14	Kruppel-like factor 6 [Source:MGI Symbol;Acc:MGI:1346318]
1282	1	Sirt2	0.326368	0.562	0.345	1.47e-18	2.25e-14	sirtuin 2 [Source:MGI Symbol;Acc:MGI:1927664]
1283	1	Mef2a	0.287667	0.674	0.446	1.6e-18	2.46e-14	myocyte enhancer factor 2A [Source:MGI Symbol;Acc:MGI:99532]
1284	1	Slc23a2	0.265289	0.263	0.092	1.61e-18	2.48e-14	solute carrier family 23 (nucleobase transporters), member 2 [Source:MGI Symbol;Acc:MGI:1859682]
1285	1	Pias1	0.265475	0.411	0.195	3.42e-18	5.26e-14	protein inhibitor of activated STAT 1 [Source:MGI Symbol;Acc:MGI:1913125]
1286	1	Entpd1	0.306638	0.362	0.164	3.76e-18	5.78e-14	ectonucleoside triphosphate diphosphohydrolase 1 [Source:MGI Symbol;Acc:MGI:102805]
1287	1	Orai1	0.285137	0.414	0.195	3.79e-18	5.82e-14	ORAI calcium release-activated calcium modulator 1 [Source:MGI Symbol;Acc:MGI:1925542]
1288	1	Osbpl11	0.305639	0.322	0.136	4.09e-18	6.29e-14	oxysterol binding protein-like 11 [Source:MGI Symbol;Acc:MGI:2146553]
1289	1	Acp2	0.309452	0.319	0.133	4.43e-18	6.8e-14	acid phosphatase 2, lysosomal [Source:MGI Symbol;Acc:MGI:87882]
1290	1	Zmynd8	0.269665	0.411	0.195	5.54e-18	8.51e-14	zinc finger, MYND-type containing 8 [Source:MGI Symbol;Acc:MGI:1918025]
1291	1	Man1a	0.285714	0.753	0.478	6.8e-18	1.04e-13	mannosidase 1, alpha [Source:MGI Symbol;Acc:MGI:104677]
1292	1	Bri3	0.312591	0.898	0.731	7.43e-18	1.14e-13	brain protein I3 [Source:MGI Symbol;Acc:MGI:1933174]
1293	1	Ptp4a2	0.28299	0.891	0.698	8.23e-18	1.26e-13	protein tyrosine phosphatase 4a2 [Source:MGI Symbol;Acc:MGI:1277117]
1294	1	Ralgds	0.29068	0.362	0.165	9.19e-18	1.41e-13	ral guanine nucleotide dissociation stimulator [Source:MGI Symbol;Acc:MGI:107485]
1295	1	Tlr4	0.300301	0.253	0.091	9.3e-18	1.43e-13	toll-like receptor 4 [Source:MGI Symbol;Acc:MGI:96824]
1296	1	Wnk1	0.266649	0.908	0.702	1.16e-17	1.78e-13	WNK lysine deficient protein kinase 1 [Source:MGI Symbol;Acc:MGI:2442092]
1297	1	Fnbp1	0.254726	0.487	0.249	1.21e-17	1.86e-13	formin binding protein 1 [Source:MGI Symbol;Acc:MGI:109606]
1298	1	Pdcd2l	0.277227	0.289	0.114	1.38e-17	2.12e-13	programmed cell death 2-like [Source:MGI Symbol;Acc:MGI:1915329]
1299	1	Atp6ap1	0.309132	0.605	0.387	1.49e-17	2.28e-13	ATPase, H+ transporting, lysosomal accessory protein 1 [Source:MGI Symbol;Acc:MGI:109629]
1300	1	Uap1l1	0.280969	0.405	0.194	2.02e-17	3.11e-13	UDP-N-acteylglucosamine pyrophosphorylase 1-like 1 [Source:MGI Symbol;Acc:MGI:2443318]
1301	1	Fnip1	0.322122	0.48	0.27	2.06e-17	3.17e-13	folliculin interacting protein 1 [Source:MGI Symbol;Acc:MGI:2444668]
1302	1	Aftph	0.283943	0.398	0.195	2.64e-17	4.06e-13	aftiphilin [Source:MGI Symbol;Acc:MGI:1923012]
1303	1	Trim47	0.291901	0.467	0.256	3.74e-17	5.75e-13	tripartite motif-containing 47 [Source:MGI Symbol;Acc:MGI:1917374]
1304	1	Cerk	0.325277	0.451	0.241	3.98e-17	6.11e-13	ceramide kinase [Source:MGI Symbol;Acc:MGI:2386052]
1305	1	Rnf13	0.318977	0.503	0.291	4.35e-17	6.68e-13	ring finger protein 13 [Source:MGI Symbol;Acc:MGI:1346341]
1306	1	Vwa5a	0.317385	0.52	0.302	7.9e-17	1.21e-12	von Willebrand factor A domain containing 5A [Source:MGI Symbol;Acc:MGI:1915026]
1307	1	G3bp2	0.283885	0.724	0.482	9.69e-17	1.49e-12	GTPase activating protein (SH3 domain) binding protein 2 [Source:MGI Symbol;Acc:MGI:2442040]
1308	1	Mapkapk2	0.253845	0.562	0.338	1.53e-16	2.35e-12	MAP kinase-activated protein kinase 2 [Source:MGI Symbol;Acc:MGI:109298]
1309	1	Atp6v1b2	0.257117	0.5	0.267	1.62e-16	2.49e-12	ATPase, H+ transporting, lysosomal V1 subunit B2 [Source:MGI Symbol;Acc:MGI:109618]
1310	1	Trim30a	0.271698	0.424	0.218	1.76e-16	2.71e-12	tripartite motif-containing 30A [Source:MGI Symbol;Acc:MGI:98178]
1311	1	Pip5k1c	0.259845	0.368	0.173	2.18e-16	3.35e-12	phosphatidylinositol-4-phosphate 5-kinase, type 1 gamma [Source:MGI Symbol;Acc:MGI:1298224]
1312	1	Pacsin2	0.313063	0.48	0.278	2.33e-16	3.59e-12	protein kinase C and casein kinase substrate in neurons 2 [Source:MGI Symbol;Acc:MGI:1345153]
1313	1	Camkk2	0.252681	0.303	0.127	3.61e-16	5.55e-12	calcium/calmodulin-dependent protein kinase kinase 2, beta [Source:MGI Symbol;Acc:MGI:2444812]
1314	1	Ppp1r10	0.330867	0.753	0.564	3.7e-16	5.68e-12	protein phosphatase 1, regulatory subunit 10 [Source:MGI Symbol;Acc:MGI:1289273]
1315	1	Neu1	0.2717	0.414	0.209	4.46e-16	6.86e-12	neuraminidase 1 [Source:MGI Symbol;Acc:MGI:97305]
1316	1	Txn2	0.285981	0.599	0.374	6.02e-16	9.25e-12	thioredoxin 2 [Source:MGI Symbol;Acc:MGI:1929468]
1317	1	Srsf2	0.298833	0.882	0.712	7.89e-16	1.21e-11	serine/arginine-rich splicing factor 2 [Source:MGI Symbol;Acc:MGI:98284]
1318	1	Eef2k	0.268378	0.286	0.121	1.58e-15	2.43e-11	eukaryotic elongation factor-2 kinase [Source:MGI Symbol;Acc:MGI:1195261]
1319	1	Fam174a	0.267187	0.546	0.319	1.74e-15	2.67e-11	family with sequence similarity 174, member A [Source:MGI Symbol;Acc:MGI:1914948]
1320	1	Zfand5	0.305463	0.875	0.683	2.3e-15	3.54e-11	zinc finger, AN1-type domain 5 [Source:MGI Symbol;Acc:MGI:1278334]
1321	1	Trps1	0.268282	0.457	0.256	3.45e-15	5.31e-11	transcriptional repressor GATA binding 1 [Source:MGI Symbol;Acc:MGI:1927616]
1322	1	Cpeb2	0.275104	0.28	0.117	4.61e-15	7.09e-11	cytoplasmic polyadenylation element binding protein 2 [Source:MGI Symbol;Acc:MGI:2442640]
1323	1	Evi5	0.291123	0.438	0.246	4.84e-15	7.44e-11	ecotropic viral integration site 5 [Source:MGI Symbol;Acc:MGI:104736]
1324	1	Tet3	0.265608	0.461	0.244	5.01e-15	7.69e-11	tet methylcytosine dioxygenase 3 [Source:MGI Symbol;Acc:MGI:2446229]
1325	1	Aldh9a1	0.284837	0.395	0.203	5.71e-15	8.78e-11	aldehyde dehydrogenase 9, subfamily A1 [Source:MGI Symbol;Acc:MGI:1861622]
1326	1	Spred1	0.328096	0.503	0.301	5.87e-15	9.02e-11	sprouty protein with EVH-1 domain 1, related sequence [Source:MGI Symbol;Acc:MGI:2150016]
1327	1	Erp29	0.255148	0.826	0.624	9.07e-15	1.39e-10	endoplasmic reticulum protein 29 [Source:MGI Symbol;Acc:MGI:1914647]
1328	1	Dnajb14	0.296888	0.487	0.289	9.5e-15	1.46e-10	DnaJ heat shock protein family (Hsp40) member B14 [Source:MGI Symbol;Acc:MGI:1917854]
1329	1	Cnppd1	0.250696	0.418	0.225	1.12e-14	1.72e-10	cyclin Pas1/PHO80 domain containing 1 [Source:MGI Symbol;Acc:MGI:1916421]
1330	1	Cpt1a	0.282374	0.48	0.28	1.22e-14	1.88e-10	carnitine palmitoyltransferase 1a, liver [Source:MGI Symbol;Acc:MGI:1098296]
1331	1	Rnpep	0.272188	0.414	0.221	1.32e-14	2.03e-10	arginyl aminopeptidase (aminopeptidase B) [Source:MGI Symbol;Acc:MGI:2384902]
1332	1	Sbf2	0.257617	0.438	0.246	1.57e-14	2.41e-10	SET binding factor 2 [Source:MGI Symbol;Acc:MGI:1921831]
1333	1	Phf23	0.258766	0.349	0.171	1.83e-14	2.82e-10	PHD finger protein 23 [Source:MGI Symbol;Acc:MGI:1925496]
1334	1	Sdc4	0.375025	0.605	0.39	3.34e-14	5.13e-10	syndecan 4 [Source:MGI Symbol;Acc:MGI:1349164]
1335	1	Rab1a	0.295612	0.688	0.507	3.5e-14	5.38e-10	RAB1A, member RAS oncogene family [Source:MGI Symbol;Acc:MGI:97842]
1336	1	Zfp36	0.298963	0.951	0.763	3.53e-14	5.42e-10	zinc finger protein 36 [Source:MGI Symbol;Acc:MGI:99180]
1337	1	Hs6st1	0.266745	0.273	0.119	4.44e-14	6.82e-10	heparan sulfate 6-O-sulfotransferase 1 [Source:MGI Symbol;Acc:MGI:1354958]
1338	1	Sde2	0.290435	0.569	0.37	6.8e-14	1.04e-09	SDE2 telomere maintenance homolog (S. pombe) [Source:MGI Symbol;Acc:MGI:2384788]
1339	1	Rapgef6	0.295618	0.474	0.281	1.1e-13	1.7e-09	Rap guanine nucleotide exchange factor (GEF) 6 [Source:MGI Symbol;Acc:MGI:2384761]
1340	1	Trim25	0.301173	0.487	0.289	1.95e-13	3e-09	tripartite motif-containing 25 [Source:MGI Symbol;Acc:MGI:102749]
1341	1	Zfp36l1	0.322253	0.911	0.684	2.18e-13	3.34e-09	zinc finger protein 36, C3H type-like 1 [Source:MGI Symbol;Acc:MGI:107946]
1342	1	Tubb6	0.258373	0.628	0.415	2.55e-13	3.91e-09	tubulin, beta 6 class V [Source:MGI Symbol;Acc:MGI:1915201]
1343	1	Gadd45b	0.255554	0.826	0.637	3.22e-13	4.95e-09	growth arrest and DNA-damage-inducible 45 beta [Source:MGI Symbol;Acc:MGI:107776]
1344	1	Fndc3a	0.261239	0.549	0.352	3.8e-13	5.83e-09	fibronectin type III domain containing 3A [Source:MGI Symbol;Acc:MGI:1196463]
1345	1	Samd4	0.250171	0.253	0.109	4.53e-13	6.96e-09	sterile alpha motif domain containing 4 [Source:MGI Symbol;Acc:MGI:1921730]
1346	1	Litaf	0.272755	0.701	0.511	1.09e-12	1.67e-08	LPS-induced TN factor [Source:MGI Symbol;Acc:MGI:1929512]
1347	1	Slc5a3	0.253587	0.319	0.157	1.3e-12	1.99e-08	solute carrier family 5 (inositol transporters), member 3 [Source:MGI Symbol;Acc:MGI:1858226]
1348	1	Ppp3ca	0.256712	0.661	0.471	1.36e-12	2.09e-08	protein phosphatase 3, catalytic subunit, alpha isoform [Source:MGI Symbol;Acc:MGI:107164]
1349	1	Chka	0.350346	0.421	0.251	6.01e-12	9.24e-08	choline kinase alpha [Source:MGI Symbol;Acc:MGI:107760]
1350	1	Atf4	0.26044	0.878	0.715	3.59e-11	5.52e-07	activating transcription factor 4 [Source:MGI Symbol;Acc:MGI:88096]
1351	1	Ehd1	0.283262	0.632	0.468	5.94e-11	9.13e-07	EH-domain containing 1 [Source:MGI Symbol;Acc:MGI:1341878]
1352	1	Hbegf	0.309483	0.273	0.133	9e-11	1.38e-06	heparin-binding EGF-like growth factor [Source:MGI Symbol;Acc:MGI:96070]
1353	1	Egr1	0.253078	0.97	0.776	2.28e-10	3.5e-06	early growth response 1 [Source:MGI Symbol;Acc:MGI:95295]
1354	1	Enpep	0.330955	0.316	0.18	2.91e-10	4.47e-06	glutamyl aminopeptidase [Source:MGI Symbol;Acc:MGI:106645]
1355	1	Trib1	0.277656	0.49	0.328	1.59e-09	2.44e-05	tribbles pseudokinase 1 [Source:MGI Symbol;Acc:MGI:2443397]
1356	2	Cdh5	2.24403	0.995	0.066	1.28e-257	1.97e-253	cadherin 5 [Source:MGI Symbol;Acc:MGI:105057]
1357	2	Tcf15	2.0035	0.944	0.062	1.99e-240	3.06e-236	transcription factor 15 [Source:MGI Symbol;Acc:MGI:104664]
1358	2	Kdr	2.04282	0.934	0.067	1.56e-232	2.4e-228	kinase insert domain protein receptor [Source:MGI Symbol;Acc:MGI:96683]
1359	2	Gpihbp1	2.61737	0.985	0.089	1e-230	1.54e-226	GPI-anchored HDL-binding protein 1 [Source:MGI Symbol;Acc:MGI:1915703]
1360	2	Egfl7	2.00252	0.954	0.074	9.86e-228	1.52e-223	EGF-like domain 7 [Source:MGI Symbol;Acc:MGI:2449923]
1361	2	Cldn5	2.73725	0.99	0.101	2.46e-223	3.78e-219	claudin 5 [Source:MGI Symbol;Acc:MGI:1276112]
1362	2	Adgrl4	1.59519	0.857	0.05	5.06e-223	7.77e-219	adhesion G protein-coupled receptor L4 [Source:MGI Symbol;Acc:MGI:2655562]
1363	2	Ptprb	2.02537	0.929	0.069	3.61e-222	5.55e-218	protein tyrosine phosphatase, receptor type, B [Source:MGI Symbol;Acc:MGI:97809]
1364	2	Flt1	2.02817	0.939	0.076	4.18e-218	6.42e-214	FMS-like tyrosine kinase 1 [Source:MGI Symbol;Acc:MGI:95558]
1365	2	Rasip1	1.52388	0.872	0.055	5.3e-218	8.14e-214	Ras interacting protein 1 [Source:MGI Symbol;Acc:MGI:1917153]
1366	2	C1qtnf9	1.69305	0.832	0.049	5.96e-214	9.15e-210	C1q and tumor necrosis factor related protein 9 [Source:MGI Symbol;Acc:MGI:3045252]
1367	2	Esam	1.82656	0.954	0.083	6.38e-213	9.8e-209	endothelial cell-specific adhesion molecule [Source:MGI Symbol;Acc:MGI:1916774]
1368	2	Btnl9	1.64358	0.796	0.042	9.27e-209	1.42e-204	butyrophilin-like 9 [Source:MGI Symbol;Acc:MGI:2442439]
1369	2	Pecam1	1.85106	0.923	0.082	5.38e-206	8.27e-202	platelet/endothelial cell adhesion molecule 1 [Source:MGI Symbol;Acc:MGI:97537]
1370	2	Ushbp1	1.28589	0.73	0.035	1.54e-200	2.37e-196	USH1 protein network component harmonin binding protein 1 [Source:MGI Symbol;Acc:MGI:1922920]
1371	2	Mmrn2	1.32571	0.73	0.041	1.46e-189	2.25e-185	multimerin 2 [Source:MGI Symbol;Acc:MGI:2385618]
1372	2	Emcn	1.45965	0.765	0.049	7.27e-189	1.12e-184	endomucin [Source:MGI Symbol;Acc:MGI:1891716]
1373	2	Palmd	1.40437	0.776	0.051	1.96e-188	3.01e-184	palmdelphin [Source:MGI Symbol;Acc:MGI:2148896]
1374	2	Adgrf5	1.78685	0.944	0.107	3.88e-188	5.97e-184	adhesion G protein-coupled receptor F5 [Source:MGI Symbol;Acc:MGI:2182928]
1375	2	Cyyr1	1.33692	0.74	0.044	2.91e-187	4.47e-183	cysteine and tyrosine-rich protein 1 [Source:MGI Symbol;Acc:MGI:2152187]
1376	2	Ecscr	1.49907	0.796	0.063	6.72e-185	1.03e-180	endothelial cell surface expressed chemotaxis and apoptosis regulator [Source:MGI Symbol;Acc:MGI:1915795]
1377	2	Timp4	1.57692	0.832	0.064	5.74e-183	8.82e-179	tissue inhibitor of metalloproteinase 4 [Source:MGI Symbol;Acc:MGI:109125]
1378	2	Itga6	1.48368	0.821	0.069	5.17e-181	7.94e-177	integrin alpha 6 [Source:MGI Symbol;Acc:MGI:96605]
1379	2	Ablim3	1.29402	0.73	0.046	2.07e-180	3.18e-176	actin binding LIM protein family, member 3 [Source:MGI Symbol;Acc:MGI:2442582]
1380	2	Tspan7	1.42263	0.76	0.055	1.29e-179	1.98e-175	tetraspanin 7 [Source:MGI Symbol;Acc:MGI:1298407]
1381	2	Tspan13	1.71013	0.923	0.116	7.02e-179	1.08e-174	tetraspanin 13 [Source:MGI Symbol;Acc:MGI:1913359]
1382	2	Tinagl1	1.40838	0.796	0.061	1.84e-177	2.82e-173	tubulointerstitial nephritis antigen-like 1 [Source:MGI Symbol;Acc:MGI:2137617]
1383	2	Aqp7	1.21097	0.699	0.039	3.58e-177	5.49e-173	aquaporin 7 [Source:MGI Symbol;Acc:MGI:1314647]
1384	2	Rbp7	2.02254	0.755	0.055	9.73e-176	1.5e-171	retinol binding protein 7, cellular [Source:MGI Symbol;Acc:MGI:1890409]
1385	2	Myct1	1.13671	0.643	0.03	9.53e-175	1.46e-170	myc target 1 [Source:MGI Symbol;Acc:MGI:1915882]
1386	2	Car4	1.45754	0.694	0.043	1.6e-170	2.45e-166	carbonic anhydrase 4 [Source:MGI Symbol;Acc:MGI:1096574]
1387	2	Cd300lg	1.92293	0.949	0.149	2.06e-167	3.17e-163	CD300 molecule like family member G [Source:MGI Symbol;Acc:MGI:1289168]
1388	2	Adgrg1	1.22203	0.77	0.069	2.05e-164	3.16e-160	adhesion G protein-coupled receptor G1 [Source:MGI Symbol;Acc:MGI:1340051]
1389	2	Mgll	2.27594	0.99	0.194	5.3e-162	8.14e-158	monoglyceride lipase [Source:MGI Symbol;Acc:MGI:1346042]
1390	2	Cyp4b1	1.33321	0.735	0.056	9.32e-162	1.43e-157	cytochrome P450, family 4, subfamily b, polypeptide 1 [Source:MGI Symbol;Acc:MGI:103225]
1391	2	Meox2	1.20911	0.755	0.067	1.08e-159	1.66e-155	mesenchyme homeobox 2 [Source:MGI Symbol;Acc:MGI:103219]
1392	2	Cxcl9	1.13394	0.679	0.046	8.52e-159	1.31e-154	chemokine (C-X-C motif) ligand 9 [Source:MGI Symbol;Acc:MGI:1352449]
1393	2	Robo4	1.06009	0.622	0.034	4.05e-158	6.23e-154	roundabout guidance receptor 4 [Source:MGI Symbol;Acc:MGI:1921394]
1394	2	Dll4	1.1032	0.571	0.025	2.46e-157	3.78e-153	delta like canonical Notch ligand 4 [Source:MGI Symbol;Acc:MGI:1859388]
1395	2	S1pr1	1.52866	0.913	0.141	2.94e-157	4.52e-153	sphingosine-1-phosphate receptor 1 [Source:MGI Symbol;Acc:MGI:1096355]
1396	2	Apold1	1.40217	0.755	0.065	4.27e-157	6.56e-153	apolipoprotein L domain containing 1 [Source:MGI Symbol;Acc:MGI:2685921]
1397	2	Icam2	1.25648	0.719	0.061	3.47e-156	5.33e-152	intercellular adhesion molecule 2 [Source:MGI Symbol;Acc:MGI:96394]
1398	2	Ctla2a	1.95135	0.934	0.14	4.93e-156	7.58e-152	cytotoxic T lymphocyte-associated protein 2 alpha [Source:MGI Symbol;Acc:MGI:88554]
1399	2	Kank3	1.4258	0.821	0.103	3.89e-155	5.98e-151	KN motif and ankyrin repeat domains 3 [Source:MGI Symbol;Acc:MGI:1098615]
1400	2	Sox17	1.22575	0.607	0.034	5.18e-154	7.97e-150	SRY (sex determining region Y)-box 17 [Source:MGI Symbol;Acc:MGI:107543]
1401	2	Scarb1	1.38585	0.776	0.088	3.71e-149	5.7e-145	scavenger receptor class B, member 1 [Source:MGI Symbol;Acc:MGI:893578]
1402	2	Aqp1	2.42379	0.704	0.067	7e-148	1.08e-143	aquaporin 1 [Source:MGI Symbol;Acc:MGI:103201]
1403	2	Rgcc	1.94878	0.959	0.202	3.27e-144	5.03e-140	regulator of cell cycle [Source:MGI Symbol;Acc:MGI:1913464]
1404	2	Cav2	1.33776	0.806	0.112	2.17e-141	3.34e-137	caveolin 2 [Source:MGI Symbol;Acc:MGI:107571]
1405	2	Cdh13	1.35729	0.76	0.093	5.73e-141	8.8e-137	cadherin 13 [Source:MGI Symbol;Acc:MGI:99551]
1406	2	Cav1	1.96377	0.974	0.248	8.55e-139	1.31e-134	caveolin 1, caveolae protein [Source:MGI Symbol;Acc:MGI:102709]
1407	2	Id1	1.57421	0.796	0.111	1.07e-138	1.64e-134	inhibitor of DNA binding 1, HLH protein [Source:MGI Symbol;Acc:MGI:96396]
1408	2	Trp53i11	1.29777	0.684	0.065	2.99e-138	4.59e-134	transformation related protein 53 inducible protein 11 [Source:MGI Symbol;Acc:MGI:2670995]
1409	2	Etl4	1.02547	0.587	0.04	3.51e-138	5.4e-134	enhancer trap locus 4 [Source:MGI Symbol;Acc:MGI:95454]
1410	2	Lmo7	1.00569	0.571	0.035	3.74e-138	5.75e-134	LIM domain only 7 [Source:MGI Symbol;Acc:MGI:1353586]
1411	2	Nrarp	1.08562	0.617	0.046	3.76e-137	5.79e-133	Notch-regulated ankyrin repeat protein [Source:MGI Symbol;Acc:MGI:1914372]
1412	2	Mcf2l	0.975278	0.622	0.05	6.12e-136	9.41e-132	mcf.2 transforming sequence-like [Source:MGI Symbol;Acc:MGI:103263]
1413	2	Arhgef15	0.779444	0.526	0.029	6.47e-131	9.95e-127	Rho guanine nucleotide exchange factor (GEF) 15 [Source:MGI Symbol;Acc:MGI:3045246]
1414	2	Thrsp	0.811154	0.684	0.07	2.03e-128	3.12e-124	thyroid hormone responsive [Source:MGI Symbol;Acc:MGI:109126]
1415	2	Epas1	1.51356	0.929	0.209	3.16e-127	4.85e-123	endothelial PAS domain protein 1 [Source:MGI Symbol;Acc:MGI:109169]
1416	2	Podxl	1.00665	0.561	0.04	4.79e-126	7.36e-122	podocalyxin-like [Source:MGI Symbol;Acc:MGI:1351317]
1417	2	Fgd5	0.897895	0.561	0.042	6.35e-125	9.76e-121	FYVE, RhoGEF and PH domain containing 5 [Source:MGI Symbol;Acc:MGI:2443369]
1418	2	Lmcd1	0.862925	0.505	0.029	7.49e-125	1.15e-120	LIM and cysteine-rich domains 1 [Source:MGI Symbol;Acc:MGI:1353635]
1419	2	Clic5	1.05023	0.617	0.057	3.57e-124	5.48e-120	chloride intracellular channel 5 [Source:MGI Symbol;Acc:MGI:1917912]
1420	2	Tspan15	0.919785	0.582	0.046	4.47e-124	6.87e-120	tetraspanin 15 [Source:MGI Symbol;Acc:MGI:1917673]
1421	2	Sox7	0.806744	0.459	0.022	3.14e-122	4.82e-118	SRY (sex determining region Y)-box 7 [Source:MGI Symbol;Acc:MGI:98369]
1422	2	Tm4sf1	1.8111	0.934	0.248	1.67e-121	2.56e-117	transmembrane 4 superfamily member 1 [Source:MGI Symbol;Acc:MGI:104678]
1423	2	Afap1l1	0.950292	0.628	0.065	1.76e-121	2.7e-117	actin filament associated protein 1-like 1 [Source:MGI Symbol;Acc:MGI:2147199]
1424	2	Gng11	1.85743	0.949	0.282	5.13e-121	7.88e-117	guanine nucleotide binding protein (G protein), gamma 11 [Source:MGI Symbol;Acc:MGI:1913316]
1425	2	Rnf125	1.04691	0.668	0.074	5.7e-121	8.75e-117	ring finger protein 125 [Source:MGI Symbol;Acc:MGI:1914914]
1426	2	Kif26a	0.797223	0.459	0.022	5.78e-120	8.88e-116	kinesin family member 26A [Source:MGI Symbol;Acc:MGI:2447072]
1427	2	Tie1	0.884701	0.515	0.034	5.95e-120	9.14e-116	tyrosine kinase with immunoglobulin-like and EGF-like domains 1 [Source:MGI Symbol;Acc:MGI:99906]
1428	2	Nova2	0.682063	0.434	0.018	8.13e-120	1.25e-115	NOVA alternative splicing regulator 2 [Source:MGI Symbol;Acc:MGI:104296]
1429	2	Unc45b	0.996893	0.643	0.07	3.4e-119	5.22e-115	unc-45 myosin chaperone B [Source:MGI Symbol;Acc:MGI:2443377]
1430	2	Aplnr	0.841599	0.469	0.025	2.03e-118	3.11e-114	apelin receptor [Source:MGI Symbol;Acc:MGI:1346086]
1431	2	Cd93	1.51587	0.857	0.183	4.16e-118	6.39e-114	CD93 antigen [Source:MGI Symbol;Acc:MGI:106664]
1432	2	Sh3bp5	1.40271	0.862	0.195	4.27e-118	6.56e-114	SH3-domain binding protein 5 (BTK-associated) [Source:MGI Symbol;Acc:MGI:1344391]
1433	2	Sox18	0.855281	0.459	0.025	3.58e-117	5.5e-113	SRY (sex determining region Y)-box 18 [Source:MGI Symbol;Acc:MGI:103559]
1434	2	Cd200	1.22732	0.689	0.092	1.47e-116	2.25e-112	CD200 antigen [Source:MGI Symbol;Acc:MGI:1196990]
1435	2	Efna1	0.709064	0.449	0.023	1.31e-115	2.01e-111	ephrin A1 [Source:MGI Symbol;Acc:MGI:103236]
1436	2	Hspb1	1.73193	0.964	0.323	5.53e-114	8.5e-110	heat shock protein 1 [Source:MGI Symbol;Acc:MGI:96240]
1437	2	C130074G19Rik	0.840501	0.536	0.041	9.45e-114	1.45e-109	RIKEN cDNA C130074G19 gene [Source:MGI Symbol;Acc:MGI:2444831]
1438	2	Gm12002	0.822307	0.434	0.021	2.08e-113	3.2e-109	predicted gene 12002 [Source:MGI Symbol;Acc:MGI:3651521]
1439	2	Nes	0.905934	0.628	0.067	6.67e-113	1.03e-108	nestin [Source:MGI Symbol;Acc:MGI:101784]
1440	2	Hspa12b	0.902605	0.52	0.042	2e-112	3.07e-108	heat shock protein 12B [Source:MGI Symbol;Acc:MGI:1919880]
1441	2	Hrct1	0.883227	0.566	0.051	3.31e-112	5.09e-108	histidine rich carboxyl terminus 1 [Source:MGI Symbol;Acc:MGI:1917945]
1442	2	Cd36	1.80747	0.995	0.436	2.95e-111	4.54e-107	CD36 molecule [Source:MGI Symbol;Acc:MGI:107899]
1443	2	Myo10	1.12324	0.668	0.088	4.11e-111	6.31e-107	myosin X [Source:MGI Symbol;Acc:MGI:107716]
1444	2	Grrp1	0.776372	0.408	0.018	3.26e-110	5.01e-106	glycine/arginine rich protein 1 [Source:MGI Symbol;Acc:MGI:1919940]
1445	2	Bcl6b	0.865388	0.474	0.032	8.46e-109	1.3e-104	B cell CLL/lymphoma 6, member B [Source:MGI Symbol;Acc:MGI:1278332]
1446	2	2022-09-04	1.25271	0.816	0.156	9.35e-109	1.44e-104	septin 4 [Source:MGI Symbol;Acc:MGI:1270156]
1447	2	Lnx1	0.731819	0.413	0.02	3.76e-108	5.78e-104	ligand of numb-protein X 1 [Source:MGI Symbol;Acc:MGI:1278335]
1448	2	Cdc42ep3	1.50604	0.837	0.197	1.02e-106	1.57e-102	CDC42 effector protein (Rho GTPase binding) 3 [Source:MGI Symbol;Acc:MGI:2384718]
1449	2	Erg	0.651774	0.439	0.025	2.23e-106	3.43e-102	ETS transcription factor [Source:MGI Symbol;Acc:MGI:95415]
1450	2	Dysf	0.666334	0.434	0.025	1.07e-105	1.64e-101	dysferlin [Source:MGI Symbol;Acc:MGI:1349385]
1451	2	Ly6c1	1.60704	0.944	0.315	2.4e-105	3.68e-101	lymphocyte antigen 6 complex, locus C1 [Source:MGI Symbol;Acc:MGI:96882]
1452	2	Ctnnbip1	1.32375	0.837	0.209	3.56e-105	5.47e-101	catenin beta interacting protein 1 [Source:MGI Symbol;Acc:MGI:1915756]
1453	2	Slc9a3r2	1.46073	0.862	0.24	5.76e-105	8.86e-101	solute carrier family 9 (sodium/hydrogen exchanger), member 3 regulator 2 [Source:MGI Symbol;Acc:MGI:1890662]
1454	2	Jam2	1.26199	0.796	0.178	1.26e-104	1.93e-100	junction adhesion molecule 2 [Source:MGI Symbol;Acc:MGI:1933820]
1455	2	Fabp4	2.40627	1	0.64	4.95e-104	7.61e-100	fatty acid binding protein 4, adipocyte [Source:MGI Symbol;Acc:MGI:88038]
1456	2	Prex2	0.990834	0.648	0.092	1.36e-103	2.09e-99	phosphatidylinositol-3,4,5-trisphosphate-dependent Rac exchange factor 2 [Source:MGI Symbol;Acc:MGI:1923385]
1457	2	Dock9	0.91711	0.582	0.067	1.6e-103	2.46e-99	dedicator of cytokinesis 9 [Source:MGI Symbol;Acc:MGI:106321]
1458	2	Ramp2	1.5342	0.867	0.255	2.85e-102	4.38e-98	receptor (calcitonin) activity modifying protein 2 [Source:MGI Symbol;Acc:MGI:1859650]
1459	2	Dab2ip	1.02742	0.704	0.118	7.2e-102	1.11e-97	disabled 2 interacting protein [Source:MGI Symbol;Acc:MGI:1916851]
1460	2	Tmem182	0.773096	0.464	0.033	9.46e-102	1.45e-97	transmembrane protein 182 [Source:MGI Symbol;Acc:MGI:1923725]
1461	2	Sema3g	0.926646	0.388	0.018	1.09e-101	1.68e-97	sema domain, immunoglobulin domain (Ig), short basic domain, secreted, (semaphorin) 3G [Source:MGI Symbol;Acc:MGI:3041242]
1462	2	Lims2	1.28162	0.776	0.171	1.61e-101	2.47e-97	LIM and senescent cell antigen like domains 2 [Source:MGI Symbol;Acc:MGI:2385067]
1463	2	Pkp4	1.12392	0.704	0.126	3.32e-99	5.1e-95	plakophilin 4 [Source:MGI Symbol;Acc:MGI:109281]
1464	2	Eng	1.27691	0.847	0.24	2.43e-98	3.73e-94	endoglin [Source:MGI Symbol;Acc:MGI:95392]
1465	2	Adamts9	0.944671	0.597	0.076	1.58e-97	2.43e-93	a disintegrin-like and metallopeptidase (reprolysin type) with thrombospondin type 1 motif, 9 [Source:MGI Symbol;Acc:MGI:1916320]
1466	2	Tjp1	1.21818	0.724	0.144	1.85e-97	2.84e-93	tight junction protein 1 [Source:MGI Symbol;Acc:MGI:98759]
1467	2	Tmcc3	1.4463	0.837	0.233	3.68e-97	5.66e-93	transmembrane and coiled coil domains 3 [Source:MGI Symbol;Acc:MGI:2442900]
1468	2	Itga1	0.903528	0.51	0.05	9.46e-97	1.45e-92	integrin alpha 1 [Source:MGI Symbol;Acc:MGI:96599]
1469	2	Pde2a	1.05642	0.694	0.123	1.68e-96	2.58e-92	phosphodiesterase 2A, cGMP-stimulated [Source:MGI Symbol;Acc:MGI:2446107]
1470	2	Snrk	1.41147	0.842	0.25	6.15e-96	9.45e-92	SNF related kinase [Source:MGI Symbol;Acc:MGI:108104]
1471	2	Ccdc85a	0.751978	0.423	0.029	4.55e-95	6.99e-91	coiled-coil domain containing 85A [Source:MGI Symbol;Acc:MGI:2445069]
1472	2	Pdzd2	1.1775	0.684	0.126	5.6e-95	8.6e-91	PDZ domain containing 2 [Source:MGI Symbol;Acc:MGI:1922394]
1473	2	Uaca	1.17529	0.781	0.191	5.7e-95	8.75e-91	uveal autoantigen with coiled-coil domains and ankyrin repeats [Source:MGI Symbol;Acc:MGI:1919815]
1474	2	Kcna5	0.608085	0.352	0.016	1.01e-94	1.55e-90	potassium voltage-gated channel, shaker-related subfamily, member 5 [Source:MGI Symbol;Acc:MGI:96662]
1475	2	She	0.630083	0.398	0.025	2.22e-93	3.42e-89	src homology 2 domain-containing transforming protein E [Source:MGI Symbol;Acc:MGI:1099462]
1476	2	Gimap6	0.984389	0.755	0.138	2.24e-93	3.45e-89	GTPase, IMAP family member 6 [Source:MGI Symbol;Acc:MGI:1918876]
1477	2	Sh2d3c	0.722904	0.439	0.033	2.53e-93	3.88e-89	SH2 domain containing 3C [Source:MGI Symbol;Acc:MGI:1351631]
1478	2	Fabp5	1.87898	0.908	0.326	4.38e-92	6.74e-88	fatty acid binding protein 5, epidermal [Source:MGI Symbol;Acc:MGI:101790]
1479	2	Bcam	0.890237	0.582	0.081	1.21e-90	1.86e-86	basal cell adhesion molecule [Source:MGI Symbol;Acc:MGI:1929940]
1480	2	Pcdh17	0.714872	0.413	0.031	1.98e-90	3.05e-86	protocadherin 17 [Source:MGI Symbol;Acc:MGI:2684924]
1481	2	Arap3	0.689924	0.423	0.033	2.45e-89	3.76e-85	ArfGAP with RhoGAP domain, ankyrin repeat and PH domain 3 [Source:MGI Symbol;Acc:MGI:2147274]
1482	2	Pdgfb	0.838668	0.551	0.073	6.16e-88	9.47e-84	platelet derived growth factor, B polypeptide [Source:MGI Symbol;Acc:MGI:97528]
1483	2	Sncg	0.54176	0.556	0.07	8.03e-88	1.23e-83	synuclein, gamma [Source:MGI Symbol;Acc:MGI:1298397]
1484	2	Efnb2	0.781719	0.429	0.036	1.71e-87	2.63e-83	ephrin B2 [Source:MGI Symbol;Acc:MGI:105097]
1485	2	Cmtm8	0.651843	0.423	0.036	7.66e-87	1.18e-82	CKLF-like MARVEL transmembrane domain containing 8 [Source:MGI Symbol;Acc:MGI:2447167]
1486	2	Crip2	1.18227	0.893	0.303	1.38e-86	2.13e-82	cysteine rich protein 2 [Source:MGI Symbol;Acc:MGI:1915587]
1487	2	Tmem252	0.901136	0.372	0.024	4.29e-86	6.59e-82	transmembrane protein 252 [Source:MGI Symbol;Acc:MGI:3583948]
1488	2	Nos2	0.487624	0.291	0.009	1.19e-85	1.82e-81	nitric oxide synthase 2, inducible [Source:MGI Symbol;Acc:MGI:97361]
1489	2	Mecom	0.715694	0.367	0.024	2.44e-85	3.75e-81	MDS1 and EVI1 complex locus [Source:MGI Symbol;Acc:MGI:95457]
1490	2	Plcb4	1.13171	0.714	0.167	3.63e-85	5.58e-81	phospholipase C, beta 4 [Source:MGI Symbol;Acc:MGI:107464]
1491	2	Irx3	0.588424	0.316	0.014	1.34e-83	2.06e-79	Iroquois related homeobox 3 [Source:MGI Symbol;Acc:MGI:1197522]
1492	2	Cracr2b	0.813467	0.587	0.093	1.81e-83	2.78e-79	calcium release activated channel regulator 2B [Source:MGI Symbol;Acc:MGI:2446129]
1493	2	Abcb1a	0.618341	0.393	0.03	3.61e-83	5.55e-79	ATP-binding cassette, sub-family B (MDR/TAP), member 1A [Source:MGI Symbol;Acc:MGI:97570]
1494	2	Clec1a	0.667289	0.418	0.036	3.62e-83	5.57e-79	C-type lectin domain family 1, member a [Source:MGI Symbol;Acc:MGI:2444151]
1495	2	Abcg2	0.908788	0.602	0.107	3.91e-83	6.01e-79	ATP binding cassette subfamily G member 2 (Junior blood group) [Source:MGI Symbol;Acc:MGI:1347061]
1496	2	Kitl	1.27323	0.847	0.303	7.43e-83	1.14e-78	kit ligand [Source:MGI Symbol;Acc:MGI:96974]
1497	2	Pcdh1	0.76405	0.459	0.05	3.53e-82	5.42e-78	protocadherin 1 [Source:MGI Symbol;Acc:MGI:104692]
1498	2	Slc1a1	0.60748	0.327	0.017	5.52e-82	8.48e-78	solute carrier family 1 (neuronal/epithelial high affinity glutamate transporter, system Xag), member 1 [Source:MGI Symbol;Acc:MGI:105083]
1499	2	Wwtr1	1.08712	0.806	0.247	8.34e-82	1.28e-77	WW domain containing transcription regulator 1 [Source:MGI Symbol;Acc:MGI:1917649]
1500	2	Tanc1	0.935959	0.638	0.126	3.04e-81	4.68e-77	tetratricopeptide repeat, ankyrin repeat and coiled-coil containing 1 [Source:MGI Symbol;Acc:MGI:1914110]
1501	2	Dach1	0.612453	0.342	0.021	5.65e-81	8.69e-77	dachshund family transcription factor 1 [Source:MGI Symbol;Acc:MGI:1277991]
1502	2	Ppp1r2	1.28672	0.918	0.488	3.52e-80	5.41e-76	protein phosphatase 1, regulatory inhibitor subunit 2 [Source:MGI Symbol;Acc:MGI:1914099]
1503	2	Shank3	0.604571	0.352	0.023	3.98e-80	6.11e-76	SH3 and multiple ankyrin repeat domains 3 [Source:MGI Symbol;Acc:MGI:1930016]
1504	2	Clec14a	0.616892	0.332	0.02	5.81e-80	8.93e-76	C-type lectin domain family 14, member a [Source:MGI Symbol;Acc:MGI:1914114]
1505	2	Mylip	1.32193	0.77	0.236	1.52e-78	2.33e-74	myosin regulatory light chain interacting protein [Source:MGI Symbol;Acc:MGI:2388271]
1506	2	Sptbn1	1.15626	0.985	0.708	4.94e-78	7.59e-74	spectrin beta, non-erythrocytic 1 [Source:MGI Symbol;Acc:MGI:98388]
1507	2	Ccm2l	0.572623	0.306	0.016	8.88e-78	1.36e-73	cerebral cavernous malformation 2-like [Source:MGI Symbol;Acc:MGI:2385159]
1508	2	Nrp1	1.21983	0.98	0.607	9.92e-78	1.53e-73	neuropilin 1 [Source:MGI Symbol;Acc:MGI:106206]
1509	2	Smco4	0.92864	0.566	0.097	1.07e-77	1.65e-73	single-pass membrane protein with coiled-coil domains 4 [Source:MGI Symbol;Acc:MGI:3039636]
1510	2	Notch4	0.592165	0.352	0.025	1.83e-77	2.81e-73	notch 4 [Source:MGI Symbol;Acc:MGI:107471]
1511	2	Sgk1	1.22252	0.913	0.382	1.87e-77	2.87e-73	serum/glucocorticoid regulated kinase 1 [Source:MGI Symbol;Acc:MGI:1340062]
1512	2	Timp3	1.12727	0.939	0.351	3.68e-77	5.65e-73	tissue inhibitor of metalloproteinase 3 [Source:MGI Symbol;Acc:MGI:98754]
1513	2	Iigp1	1.43705	0.694	0.159	1.64e-76	2.52e-72	interferon inducible GTPase 1 [Source:MGI Symbol;Acc:MGI:1926259]
1514	2	N4bp3	0.615051	0.383	0.033	1.76e-76	2.7e-72	NEDD4 binding protein 3 [Source:MGI Symbol;Acc:MGI:2442218]
1515	2	Rasgrf2	0.632027	0.367	0.03	3.97e-76	6.1e-72	RAS protein-specific guanine nucleotide-releasing factor 2 [Source:MGI Symbol;Acc:MGI:109137]
1516	2	Apol10b	0.550607	0.301	0.016	5e-76	7.69e-72	apolipoprotein L 10B [Source:MGI Symbol;Acc:MGI:3043522]
1517	2	Ggta1	0.759539	0.526	0.078	1.66e-75	2.55e-71	glycoprotein galactosyltransferase alpha 1, 3 [Source:MGI Symbol;Acc:MGI:95704]
1518	2	Rgs5	0.822362	0.505	0.062	2.14e-75	3.29e-71	regulator of G-protein signaling 5 [Source:MGI Symbol;Acc:MGI:1098434]
1519	2	Sparcl1	1.19699	0.929	0.361	2.5e-75	3.84e-71	SPARC-like 1 [Source:MGI Symbol;Acc:MGI:108110]
1520	2	Fscn1	0.925248	0.592	0.116	6.35e-75	9.76e-71	fascin actin-bundling protein 1 [Source:MGI Symbol;Acc:MGI:1352745]
1521	2	Dapk2	0.711562	0.48	0.065	1.15e-74	1.76e-70	death-associated protein kinase 2 [Source:MGI Symbol;Acc:MGI:1341297]
1522	2	Gimap1	0.663075	0.566	0.088	1.24e-73	1.9e-69	GTPase, IMAP family member 1 [Source:MGI Symbol;Acc:MGI:109368]
1523	2	Tspan2	0.643701	0.393	0.037	2.17e-73	3.33e-69	tetraspanin 2 [Source:MGI Symbol;Acc:MGI:1917997]
1524	2	Nos3	0.442316	0.321	0.021	1.28e-72	1.97e-68	nitric oxide synthase 3, endothelial cell [Source:MGI Symbol;Acc:MGI:97362]
1525	2	Tspan12	0.546507	0.429	0.048	2.63e-72	4.04e-68	tetraspanin 12 [Source:MGI Symbol;Acc:MGI:1889818]
1526	2	Ptprm	0.606933	0.418	0.047	4.74e-72	7.28e-68	protein tyrosine phosphatase, receptor type, M [Source:MGI Symbol;Acc:MGI:102694]
1527	2	Bvht	0.628224	0.413	0.046	4.77e-72	7.32e-68	braveheart long non-coding RNA [Source:MGI Symbol;Acc:MGI:5434104]
1528	2	Adgrl2	0.69901	0.423	0.05	3.35e-71	5.15e-67	adhesion G protein-coupled receptor L2 [Source:MGI Symbol;Acc:MGI:2139714]
1529	2	Casz1	0.471209	0.316	0.021	6.45e-71	9.91e-67	castor zinc finger 1 [Source:MGI Symbol;Acc:MGI:1196251]
1530	2	Lpar6	0.775604	0.526	0.087	1.49e-70	2.29e-66	lysophosphatidic acid receptor 6 [Source:MGI Symbol;Acc:MGI:1914418]
1531	2	Gpr4	0.373776	0.291	0.016	1.59e-70	2.44e-66	G protein-coupled receptor 4 [Source:MGI Symbol;Acc:MGI:2441992]
1532	2	Ablim1	1.10099	0.878	0.357	1.98e-70	3.04e-66	actin-binding LIM protein 1 [Source:MGI Symbol;Acc:MGI:1194500]
1533	2	Fam89a	0.463759	0.27	0.013	2.13e-69	3.27e-65	family with sequence similarity 89, member A [Source:MGI Symbol;Acc:MGI:1916877]
1534	2	Sema7a	0.513425	0.286	0.016	3.12e-69	4.79e-65	sema domain, immunoglobulin domain (Ig), and GPI membrane anchor, (semaphorin) 7A [Source:MGI Symbol;Acc:MGI:1306826]
1535	2	Sema6a	0.889903	0.551	0.105	4.41e-69	6.78e-65	sema domain, transmembrane domain (TM), and cytoplasmic domain, (semaphorin) 6A [Source:MGI Symbol;Acc:MGI:1203727]
1536	2	Rsad2	0.734041	0.439	0.056	5.29e-69	8.14e-65	radical S-adenosyl methionine domain containing 2 [Source:MGI Symbol;Acc:MGI:1929628]
1537	2	Ybx1	0.88242	0.985	0.907	4.63e-68	7.11e-64	Y box protein 1 [Source:MGI Symbol;Acc:MGI:99146]
1538	2	Tcf4	1.14218	0.929	0.62	1.08e-67	1.67e-63	transcription factor 4 [Source:MGI Symbol;Acc:MGI:98506]
1539	2	Apbb2	0.972914	0.668	0.179	1.09e-67	1.67e-63	amyloid beta (A4) precursor protein-binding, family B, member 2 [Source:MGI Symbol;Acc:MGI:108405]
1540	2	Dgke	0.576053	0.352	0.033	2.24e-67	3.45e-63	diacylglycerol kinase, epsilon [Source:MGI Symbol;Acc:MGI:1889276]
1541	2	Gstt2	0.971356	0.592	0.133	2.84e-67	4.37e-63	glutathione S-transferase, theta 2 [Source:MGI Symbol;Acc:MGI:106188]
1542	2	Cxcl12	1.20676	0.888	0.384	1.24e-66	1.9e-62	chemokine (C-X-C motif) ligand 12 [Source:MGI Symbol;Acc:MGI:103556]
1543	2	Ets1	0.941577	0.75	0.21	2e-66	3.08e-62	E26 avian leukemia oncogene 1, 5' domain [Source:MGI Symbol;Acc:MGI:95455]
1544	2	Tnfsf10	0.607655	0.352	0.033	3.5e-66	5.38e-62	tumor necrosis factor (ligand) superfamily, member 10 [Source:MGI Symbol;Acc:MGI:107414]
1545	2	Flt4	0.407401	0.26	0.013	1.93e-65	2.96e-61	FMS-like tyrosine kinase 4 [Source:MGI Symbol;Acc:MGI:95561]
1546	2	Ehd2	1.03051	0.791	0.3	2.93e-65	4.5e-61	EH-domain containing 2 [Source:MGI Symbol;Acc:MGI:2154274]
1547	2	Yes1	0.660992	0.459	0.07	2.95e-65	4.54e-61	YES proto-oncogene 1, Src family tyrosine kinase [Source:MGI Symbol;Acc:MGI:99147]
1548	2	Pparg	0.848072	0.582	0.121	4.6e-65	7.07e-61	peroxisome proliferator activated receptor gamma [Source:MGI Symbol;Acc:MGI:97747]
1549	2	Aplp2	0.989583	0.939	0.666	7.37e-65	1.13e-60	amyloid beta (A4) precursor-like protein 2 [Source:MGI Symbol;Acc:MGI:88047]
1550	2	Limch1	0.81518	0.577	0.119	7.27e-64	1.12e-59	LIM and calponin homology domains 1 [Source:MGI Symbol;Acc:MGI:1924819]
1551	2	Caskin2	0.613262	0.342	0.034	3.26e-63	5.02e-59	CASK-interacting protein 2 [Source:MGI Symbol;Acc:MGI:2157062]
1552	2	Ndrg1	0.886677	0.73	0.222	4.69e-63	7.2e-59	N-myc downstream regulated gene 1 [Source:MGI Symbol;Acc:MGI:1341799]
1553	2	Calm1	0.758501	0.995	0.945	3.96e-62	6.08e-58	calmodulin 1 [Source:MGI Symbol;Acc:MGI:88251]
1554	2	Fli1	0.915052	0.76	0.27	1.72e-61	2.65e-57	Friend leukemia integration 1 [Source:MGI Symbol;Acc:MGI:95554]
1555	2	Pim3	1.12535	0.765	0.307	3.56e-61	5.47e-57	proviral integration site 3 [Source:MGI Symbol;Acc:MGI:1355297]
1556	2	Cldn15	0.673652	0.536	0.103	1.73e-60	2.66e-56	claudin 15 [Source:MGI Symbol;Acc:MGI:1913103]
1557	2	Fam189a2	0.468577	0.327	0.032	1.79e-60	2.76e-56	family with sequence similarity 189, member A2 [Source:MGI Symbol;Acc:MGI:2685813]
1558	2	Bst2	1.07392	0.852	0.451	5.33e-60	8.19e-56	bone marrow stromal cell antigen 2 [Source:MGI Symbol;Acc:MGI:1916800]
1559	2	Ier5l	1.02017	0.679	0.208	3.14e-59	4.83e-55	immediate early response 5-like [Source:MGI Symbol;Acc:MGI:1919750]
1560	2	Tgm2	0.777408	0.612	0.154	4.01e-59	6.16e-55	transglutaminase 2, C polypeptide [Source:MGI Symbol;Acc:MGI:98731]
1561	2	Txnip	1.07594	0.954	0.557	8.59e-59	1.32e-54	thioredoxin interacting protein [Source:MGI Symbol;Acc:MGI:1889549]
1562	2	Ets2	1.02453	0.74	0.28	1.33e-58	2.05e-54	E26 avian leukemia oncogene 2, 3' domain [Source:MGI Symbol;Acc:MGI:95456]
1563	2	Plxna2	0.699849	0.434	0.071	4.44e-58	6.82e-54	plexin A2 [Source:MGI Symbol;Acc:MGI:107684]
1564	2	F11r	0.45504	0.26	0.018	7.99e-58	1.23e-53	F11 receptor [Source:MGI Symbol;Acc:MGI:1321398]
1565	2	Fry	0.631693	0.495	0.093	1.01e-57	1.56e-53	FRY microtubule binding protein [Source:MGI Symbol;Acc:MGI:2443895]
1566	2	Adcy4	0.532233	0.316	0.032	1.02e-57	1.57e-53	adenylate cyclase 4 [Source:MGI Symbol;Acc:MGI:99674]
1567	2	Gimap8	0.459917	0.332	0.034	1.14e-57	1.75e-53	GTPase, IMAP family member 8 [Source:MGI Symbol;Acc:MGI:2685303]
1568	2	Arhgap29	0.838018	0.709	0.225	1.58e-57	2.42e-53	Rho GTPase activating protein 29 [Source:MGI Symbol;Acc:MGI:2443818]
1569	2	4931406P16Rik	0.883736	0.648	0.194	2.85e-57	4.38e-53	RIKEN cDNA 4931406P16 gene [Source:MGI Symbol;Acc:MGI:1924311]
1570	2	Fermt2	0.909099	0.832	0.356	3.5e-57	5.38e-53	fermitin family member 2 [Source:MGI Symbol;Acc:MGI:2385001]
1571	2	2900026A02Rik	0.736046	0.48	0.093	7.92e-57	1.22e-52	RIKEN cDNA 2900026A02 gene [Source:MGI Symbol;Acc:MGI:1920194]
1572	2	Tmem140	0.832625	0.633	0.185	1.56e-56	2.4e-52	transmembrane protein 140 [Source:MGI Symbol;Acc:MGI:1915737]
1573	2	Crim1	0.81798	0.577	0.145	5.07e-56	7.79e-52	cysteine rich transmembrane BMP regulator 1 (chordin like) [Source:MGI Symbol;Acc:MGI:1354756]
1574	2	Lmo1	0.841977	0.622	0.179	5.42e-56	8.32e-52	LIM domain only 1 [Source:MGI Symbol;Acc:MGI:102812]
1575	2	Slfn5	1.01033	0.827	0.397	1.54e-55	2.37e-51	schlafen 5 [Source:MGI Symbol;Acc:MGI:1329004]
1576	2	AW112010	0.694895	0.832	0.352	1.58e-55	2.44e-51	expressed sequence AW112010 [Source:MGI Symbol;Acc:MGI:2147706]
1577	2	Synm	0.571443	0.418	0.066	3.8e-55	5.83e-51	synemin, intermediate filament protein [Source:MGI Symbol;Acc:MGI:2661187]
1578	2	Magi1	0.543954	0.332	0.039	7.27e-55	1.12e-50	membrane associated guanylate kinase, WW and PDZ domain containing 1 [Source:MGI Symbol;Acc:MGI:1203522]
1579	2	Tmem245	0.791609	0.571	0.148	1.74e-54	2.67e-50	transmembrane protein 245 [Source:MGI Symbol;Acc:MGI:2445107]
1580	2	Sult1a1	0.989484	0.776	0.349	1.76e-54	2.7e-50	sulfotransferase family 1A, phenol-preferring, member 1 [Source:MGI Symbol;Acc:MGI:102896]
1581	2	Npr3	0.528722	0.367	0.049	2.51e-54	3.85e-50	natriuretic peptide receptor 3 [Source:MGI Symbol;Acc:MGI:97373]
1582	2	Ddit4	0.753261	0.429	0.076	7.82e-54	1.2e-49	DNA-damage-inducible transcript 4 [Source:MGI Symbol;Acc:MGI:1921997]
1583	2	Pola2	0.619984	0.398	0.063	8.09e-54	1.24e-49	polymerase (DNA directed), alpha 2 [Source:MGI Symbol;Acc:MGI:99690]
1584	2	4430402I18Rik	0.504574	0.265	0.022	1.5e-53	2.3e-49	RIKEN cDNA 4430402I18 gene [Source:MGI Symbol;Acc:MGI:1918036]
1585	2	Sptan1	0.90127	0.832	0.431	6.81e-53	1.05e-48	spectrin alpha, non-erythrocytic 1 [Source:MGI Symbol;Acc:MGI:98386]
1586	2	Gfod1	0.509812	0.332	0.041	4.63e-52	7.12e-48	glucose-fructose oxidoreductase domain containing 1 [Source:MGI Symbol;Acc:MGI:2145304]
1587	2	Ece1	0.941608	0.694	0.267	4.85e-52	7.46e-48	endothelin converting enzyme 1 [Source:MGI Symbol;Acc:MGI:1101357]
1588	2	Galnt18	0.533434	0.357	0.051	7.43e-52	1.14e-47	polypeptide N-acetylgalactosaminyltransferase 18 [Source:MGI Symbol;Acc:MGI:2446239]
1589	2	Utrn	0.82811	0.74	0.289	8.49e-52	1.3e-47	utrophin [Source:MGI Symbol;Acc:MGI:104631]
1590	2	Tmem204	0.61756	0.408	0.07	1.14e-51	1.75e-47	transmembrane protein 204 [Source:MGI Symbol;Acc:MGI:3039635]
1591	2	Gimap5	0.522856	0.383	0.056	3.04e-51	4.67e-47	GTPase, IMAP family member 5 [Source:MGI Symbol;Acc:MGI:2442232]
1592	2	Arhgap31	0.91805	0.699	0.276	7.27e-51	1.12e-46	Rho GTPase activating protein 31 [Source:MGI Symbol;Acc:MGI:1333857]
1593	2	Prkch	0.608946	0.464	0.093	1.67e-50	2.57e-46	protein kinase C, eta [Source:MGI Symbol;Acc:MGI:97600]
1594	2	Art3	0.455266	0.352	0.047	1.92e-50	2.95e-46	ADP-ribosyltransferase 3 [Source:MGI Symbol;Acc:MGI:1202729]
1595	2	Rapgef3	0.561435	0.337	0.046	3.31e-50	5.09e-46	Rap guanine nucleotide exchange factor (GEF) 3 [Source:MGI Symbol;Acc:MGI:2441741]
1596	2	Efnb1	0.821248	0.561	0.156	6.22e-50	9.56e-46	ephrin B1 [Source:MGI Symbol;Acc:MGI:102708]
1597	2	Plekhg1	0.599896	0.372	0.06	9.69e-50	1.49e-45	pleckstrin homology domain containing, family G (with RhoGef domain) member 1 [Source:MGI Symbol;Acc:MGI:2676551]
1598	2	Fnbp1l	0.668532	0.48	0.104	1.1e-49	1.68e-45	formin binding protein 1-like [Source:MGI Symbol;Acc:MGI:1925642]
1599	2	Myo1d	0.434735	0.306	0.036	1.24e-49	1.91e-45	myosin ID [Source:MGI Symbol;Acc:MGI:107728]
1600	2	Cd81	0.734726	0.98	0.763	1.28e-48	1.97e-44	CD81 antigen [Source:MGI Symbol;Acc:MGI:1096398]
1601	2	Chchd10	0.828563	0.429	0.084	5.45e-48	8.38e-44	coiled-coil-helix-coiled-coil-helix domain containing 10 [Source:MGI Symbol;Acc:MGI:2143558]
1602	2	Dst	0.850884	0.76	0.322	6.43e-48	9.88e-44	dystonin [Source:MGI Symbol;Acc:MGI:104627]
1603	2	Angptl4	1.05664	0.77	0.372	7.55e-48	1.16e-43	angiopoietin-like 4 [Source:MGI Symbol;Acc:MGI:1888999]
1604	2	Tnfaip1	0.787075	0.622	0.207	1.49e-47	2.3e-43	tumor necrosis factor, alpha-induced protein 1 (endothelial) [Source:MGI Symbol;Acc:MGI:104961]
1605	2	Gbp4	0.536938	0.321	0.042	1.59e-47	2.45e-43	guanylate binding protein 4 [Source:MGI Symbol;Acc:MGI:97072]
1606	2	Plk2	0.971111	0.699	0.271	2.91e-47	4.48e-43	polo like kinase 2 [Source:MGI Symbol;Acc:MGI:1099790]
1607	2	Jup	0.808322	0.694	0.28	2.93e-47	4.5e-43	junction plakoglobin [Source:MGI Symbol;Acc:MGI:96650]
1608	2	Myh9	0.80552	0.872	0.531	6.33e-47	9.72e-43	myosin, heavy polypeptide 9, non-muscle [Source:MGI Symbol;Acc:MGI:107717]
1609	2	Fam43a	0.675092	0.505	0.124	6.48e-47	9.95e-43	family with sequence similarity 43, member A [Source:MGI Symbol;Acc:MGI:2676309]
1610	2	Myo1b	0.571058	0.495	0.111	1.1e-46	1.68e-42	myosin IB [Source:MGI Symbol;Acc:MGI:107752]
1611	2	Sh3glb1	0.709039	0.934	0.763	1.23e-46	1.88e-42	SH3-domain GRB2-like B1 (endophilin) [Source:MGI Symbol;Acc:MGI:1859730]
1612	2	Adamts1	0.982722	0.811	0.349	1.89e-46	2.91e-42	a disintegrin-like and metallopeptidase (reprolysin type) with thrombospondin type 1 motif, 1 [Source:MGI Symbol;Acc:MGI:109249]
1613	2	Ctla2b	0.752183	0.505	0.123	2.09e-46	3.21e-42	cytotoxic T lymphocyte-associated protein 2 beta [Source:MGI Symbol;Acc:MGI:88555]
1614	2	Mpzl1	0.470987	0.337	0.05	2.18e-46	3.35e-42	myelin protein zero-like 1 [Source:MGI Symbol;Acc:MGI:1915731]
1615	2	St6galnac2	0.456109	0.26	0.027	2.34e-46	3.6e-42	ST6 (alpha-N-acetyl-neuraminyl-2,3-beta-galactosyl-1,3)-N-acetylgalactosaminide alpha-2,6-sialyltransferase 2 [Source:MGI Symbol;Acc:MGI:107553]
1616	2	Plpp6	0.477482	0.332	0.05	5.55e-46	8.53e-42	phospholipid phosphatase 6 [Source:MGI Symbol;Acc:MGI:1921661]
1617	2	Tshz2	0.779876	0.852	0.375	7.05e-46	1.08e-41	teashirt zinc finger family member 2 [Source:MGI Symbol;Acc:MGI:2153084]
1618	2	Plpp1	0.827571	0.612	0.203	1.02e-45	1.57e-41	phospholipid phosphatase 1 [Source:MGI Symbol;Acc:MGI:108412]
1619	2	Nus1	0.853354	0.638	0.238	1.4e-45	2.15e-41	NUS1 dehydrodolichyl diphosphate synthase subunit [Source:MGI Symbol;Acc:MGI:1196365]
1620	2	Ednrb	0.638593	0.694	0.197	2.06e-45	3.16e-41	endothelin receptor type B [Source:MGI Symbol;Acc:MGI:102720]
1621	2	Rnf144a	0.622094	0.403	0.08	2.85e-45	4.39e-41	ring finger protein 144A [Source:MGI Symbol;Acc:MGI:1344401]
1622	2	Cdc42ep1	0.49066	0.316	0.046	2.91e-45	4.47e-41	CDC42 effector protein (Rho GTPase binding) 1 [Source:MGI Symbol;Acc:MGI:1929763]
1623	2	H2-Q7	0.33827	0.684	0.207	6.44e-45	9.89e-41	histocompatibility 2, Q region locus 7 [Source:MGI Symbol;Acc:MGI:95936]
1624	2	Cd247	0.399693	0.281	0.032	9.72e-45	1.49e-40	CD247 antigen [Source:MGI Symbol;Acc:MGI:88334]
1625	2	Enah	0.480846	0.316	0.046	1.09e-44	1.68e-40	ENAH actin regulator [Source:MGI Symbol;Acc:MGI:108360]
1626	2	Pxdc1	0.743435	0.52	0.143	1.19e-44	1.83e-40	PX domain containing 1 [Source:MGI Symbol;Acc:MGI:1914145]
1627	2	Ppp1r16b	0.516821	0.337	0.051	4.88e-44	7.5e-40	protein phosphatase 1, regulatory subunit 16B [Source:MGI Symbol;Acc:MGI:2151841]
1628	2	Nxn	0.562342	0.413	0.085	1.21e-43	1.86e-39	nucleoredoxin [Source:MGI Symbol;Acc:MGI:109331]
1629	2	Ercc1	0.703696	0.526	0.154	1.43e-43	2.2e-39	excision repair cross-complementing rodent repair deficiency, complementation group 1 [Source:MGI Symbol;Acc:MGI:95412]
1630	2	Ppfibp1	0.798305	0.673	0.273	1.88e-43	2.89e-39	PTPRF interacting protein, binding protein 1 (liprin beta 1) [Source:MGI Symbol;Acc:MGI:1914783]
1631	2	Dock6	0.404554	0.276	0.033	2.25e-43	3.46e-39	dedicator of cytokinesis 6 [Source:MGI Symbol;Acc:MGI:1914789]
1632	2	Hes1	0.867612	0.638	0.231	3.66e-43	5.62e-39	hes family bHLH transcription factor 1 [Source:MGI Symbol;Acc:MGI:104853]
1633	2	Plscr2	0.618676	0.383	0.076	2.73e-42	4.2e-38	phospholipid scramblase 2 [Source:MGI Symbol;Acc:MGI:1270860]
1634	2	Ly6e	0.712664	0.944	0.633	8.83e-42	1.36e-37	lymphocyte antigen 6 complex, locus E [Source:MGI Symbol;Acc:MGI:106651]
1635	2	Rassf3	0.692416	0.485	0.128	9.61e-42	1.48e-37	Ras association (RalGDS/AF-6) domain family member 3 [Source:MGI Symbol;Acc:MGI:2179722]
1636	2	Fez2	0.72779	0.673	0.285	1.35e-41	2.07e-37	fasciculation and elongation protein zeta 2 (zygin II) [Source:MGI Symbol;Acc:MGI:2675856]
1637	2	Ptma	0.52027	0.99	0.943	2.07e-41	3.19e-37	prothymosin alpha [Source:MGI Symbol;Acc:MGI:97803]
1638	2	Cnn3	0.75293	0.658	0.25	3.06e-41	4.71e-37	calponin 3, acidic [Source:MGI Symbol;Acc:MGI:1919244]
1639	2	Tubb4b	0.831757	0.847	0.535	3.75e-41	5.76e-37	tubulin, beta 4B class IVB [Source:MGI Symbol;Acc:MGI:1915472]
1640	2	Actn4	0.767266	0.765	0.394	3.89e-41	5.97e-37	actinin alpha 4 [Source:MGI Symbol;Acc:MGI:1890773]
1641	2	Itpkb	0.70326	0.679	0.266	6.77e-41	1.04e-36	inositol 1,4,5-trisphosphate 3-kinase B [Source:MGI Symbol;Acc:MGI:109235]
1642	2	H2-K1	0.58696	0.969	0.905	9.69e-41	1.49e-36	histocompatibility 2, K1, K region [Source:MGI Symbol;Acc:MGI:95904]
1643	2	Fryl	0.791958	0.561	0.19	1.69e-40	2.6e-36	FRY like transcription coactivator [Source:MGI Symbol;Acc:MGI:1919563]
1644	2	Bik	0.342758	0.265	0.034	3.71e-40	5.7e-36	BCL2-interacting killer [Source:MGI Symbol;Acc:MGI:1206591]
1645	2	Gbp9	0.465255	0.362	0.069	4.47e-40	6.87e-36	guanylate-binding protein 9 [Source:MGI Symbol;Acc:MGI:3605620]
1646	2	Ctnnb1	0.774374	0.832	0.569	8.23e-40	1.26e-35	catenin (cadherin associated protein), beta 1 [Source:MGI Symbol;Acc:MGI:88276]
1647	2	Tspan6	0.645957	0.408	0.096	1.08e-39	1.66e-35	tetraspanin 6 [Source:MGI Symbol;Acc:MGI:1926264]
1648	2	Ptp4a3	0.659815	0.571	0.192	1.36e-39	2.09e-35	protein tyrosine phosphatase 4a3 [Source:MGI Symbol;Acc:MGI:1277098]
1649	2	Gngt2	0.650754	0.597	0.205	3.03e-39	4.66e-35	guanine nucleotide binding protein (G protein), gamma transducing activity polypeptide 2 [Source:MGI Symbol;Acc:MGI:893584]
1650	2	Exoc6	0.456745	0.342	0.062	3.9e-39	5.99e-35	exocyst complex component 6 [Source:MGI Symbol;Acc:MGI:1351611]
1651	2	Filip1	0.51688	0.367	0.075	5.01e-39	7.7e-35	filamin A interacting protein 1 [Source:MGI Symbol;Acc:MGI:1917848]
1652	2	Fzd4	0.651826	0.571	0.194	1.16e-38	1.78e-34	frizzled class receptor 4 [Source:MGI Symbol;Acc:MGI:108520]
1653	2	Smagp	0.586748	0.577	0.184	2.16e-38	3.31e-34	small cell adhesion glycoprotein [Source:MGI Symbol;Acc:MGI:2448476]
1654	2	Cdc42ep2	0.688013	0.474	0.135	2.38e-38	3.66e-34	CDC42 effector protein (Rho GTPase binding) 2 [Source:MGI Symbol;Acc:MGI:1929744]
1655	2	Ubc	0.580708	0.995	0.946	4.89e-38	7.51e-34	ubiquitin C [Source:MGI Symbol;Acc:MGI:98889]
1656	2	Inpp1	0.538872	0.439	0.114	5.14e-38	7.91e-34	inositol polyphosphate-1-phosphatase [Source:MGI Symbol;Acc:MGI:104848]
1657	2	Btg2	0.687994	0.974	0.843	1.16e-37	1.79e-33	BTG anti-proliferation factor 2 [Source:MGI Symbol;Acc:MGI:108384]
1658	2	Ldb2	0.417226	0.281	0.043	1.89e-37	2.9e-33	LIM domain binding 2 [Source:MGI Symbol;Acc:MGI:894670]
1659	2	Gimap4	0.314591	0.429	0.09	1.92e-37	2.94e-33	GTPase, IMAP family member 4 [Source:MGI Symbol;Acc:MGI:1349656]
1660	2	Cdkn1a	0.956476	0.852	0.585	2.08e-37	3.2e-33	cyclin-dependent kinase inhibitor 1A (P21) [Source:MGI Symbol;Acc:MGI:104556]
1661	2	Notch1	0.692829	0.571	0.201	2.74e-37	4.21e-33	notch 1 [Source:MGI Symbol;Acc:MGI:97363]
1662	2	Ccdc85b	0.61646	0.459	0.13	3.22e-37	4.95e-33	coiled-coil domain containing 85B [Source:MGI Symbol;Acc:MGI:2147607]
1663	2	Col4a2	0.578524	0.852	0.349	3.51e-37	5.4e-33	collagen, type IV, alpha 2 [Source:MGI Symbol;Acc:MGI:88455]
1664	2	Mfng	0.486929	0.321	0.058	4.74e-37	7.29e-33	MFNG O-fucosylpeptide 3-beta-N-acetylglucosaminyltransferase [Source:MGI Symbol;Acc:MGI:1095404]
1665	2	Scarf1	0.378898	0.255	0.035	4.93e-37	7.57e-33	scavenger receptor class F, member 1 [Source:MGI Symbol;Acc:MGI:2449455]
1666	2	Eepd1	0.442699	0.367	0.077	6.25e-37	9.6e-33	endonuclease/exonuclease/phosphatase family domain containing 1 [Source:MGI Symbol;Acc:MGI:1914734]
1667	2	Snn	0.38769	0.306	0.053	1.7e-36	2.61e-32	stannin [Source:MGI Symbol;Acc:MGI:1276549]
1668	2	Cdkn1c	0.95908	0.587	0.224	2.26e-36	3.47e-32	cyclin-dependent kinase inhibitor 1C (P57) [Source:MGI Symbol;Acc:MGI:104564]
1669	2	Rfxap	0.702126	0.526	0.185	2.31e-36	3.54e-32	regulatory factor X-associated protein [Source:MGI Symbol;Acc:MGI:2180854]
1670	2	Ppp2r5a	0.70289	0.73	0.38	2.34e-36	3.6e-32	protein phosphatase 2, regulatory subunit B', alpha [Source:MGI Symbol;Acc:MGI:2388479]
1671	2	Rapgef1	0.656694	0.526	0.175	3.83e-36	5.89e-32	Rap guanine nucleotide exchange factor (GEF) 1 [Source:MGI Symbol;Acc:MGI:104580]
1672	2	Atp5j	0.587594	0.923	0.789	9.03e-36	1.39e-31	ATP synthase, H+ transporting, mitochondrial F0 complex, subunit F [Source:MGI Symbol;Acc:MGI:107777]
1673	2	Tek	0.6355	0.495	0.153	1.41e-35	2.16e-31	TEK receptor tyrosine kinase [Source:MGI Symbol;Acc:MGI:98664]
1674	2	Myl12a	0.627024	0.913	0.718	2.57e-35	3.95e-31	myosin, light chain 12A, regulatory, non-sarcomeric [Source:MGI Symbol;Acc:MGI:1914518]
1675	2	H2-D1	0.525879	0.995	0.941	2.8e-35	4.3e-31	histocompatibility 2, D region locus 1 [Source:MGI Symbol;Acc:MGI:95896]
1676	2	Elk3	0.670863	0.571	0.22	2.84e-35	4.36e-31	ELK3, member of ETS oncogene family [Source:MGI Symbol;Acc:MGI:101762]
1677	2	Luzp1	0.73342	0.689	0.35	3.05e-35	4.69e-31	leucine zipper protein 1 [Source:MGI Symbol;Acc:MGI:107629]
1678	2	Gnas	0.52286	0.969	0.893	3.57e-35	5.48e-31	GNAS (guanine nucleotide binding protein, alpha stimulating) complex locus [Source:MGI Symbol;Acc:MGI:95777]
1679	2	Adora2a	0.398513	0.27	0.041	4.87e-35	7.48e-31	adenosine A2a receptor [Source:MGI Symbol;Acc:MGI:99402]
1680	2	H2-Q6	0.513966	0.439	0.111	4.89e-35	7.52e-31	histocompatibility 2, Q region locus 6 [Source:MGI Symbol;Acc:MGI:95935]
1681	2	Rasgrp3	0.531281	0.434	0.115	6.86e-35	1.05e-30	RAS, guanyl releasing protein 3 [Source:MGI Symbol;Acc:MGI:3028579]
1682	2	Pnpla2	0.56071	0.505	0.162	7.42e-35	1.14e-30	patatin-like phospholipase domain containing 2 [Source:MGI Symbol;Acc:MGI:1914103]
1683	2	Tob1	0.719868	0.612	0.255	8.02e-35	1.23e-30	transducer of ErbB-2.1 [Source:MGI Symbol;Acc:MGI:1349721]
1684	2	Nxpe4	0.361554	0.255	0.037	9.83e-35	1.51e-30	neurexophilin and PC-esterase domain family, member 4 [Source:MGI Symbol;Acc:MGI:1924792]
1685	2	Smtn	0.533654	0.408	0.105	1.07e-34	1.65e-30	smoothelin [Source:MGI Symbol;Acc:MGI:1354727]
1686	2	Smad1	0.746839	0.566	0.226	1.51e-34	2.32e-30	SMAD family member 1 [Source:MGI Symbol;Acc:MGI:109452]
1687	2	Lrrc32	0.557871	0.372	0.087	1.96e-34	3.02e-30	leucine rich repeat containing 32 [Source:MGI Symbol;Acc:MGI:93882]
1688	2	Gna11	0.664639	0.648	0.292	2.61e-34	4.02e-30	guanine nucleotide binding protein, alpha 11 [Source:MGI Symbol;Acc:MGI:95766]
1689	2	Arhgef5	0.323499	0.265	0.041	6.2e-34	9.54e-30	Rho guanine nucleotide exchange factor (GEF) 5 [Source:MGI Symbol;Acc:MGI:1858952]
1690	2	Gja1	0.812716	0.612	0.249	6.31e-34	9.7e-30	gap junction protein, alpha 1 [Source:MGI Symbol;Acc:MGI:95713]
1691	2	Prkd2	0.440448	0.332	0.069	6.63e-34	1.02e-29	protein kinase D2 [Source:MGI Symbol;Acc:MGI:2141917]
1692	2	Gnai2	0.538171	0.964	0.878	2.2e-33	3.38e-29	guanine nucleotide binding protein (G protein), alpha inhibiting 2 [Source:MGI Symbol;Acc:MGI:95772]
1693	2	Cd151	0.688083	0.663	0.314	2.24e-33	3.45e-29	CD151 antigen [Source:MGI Symbol;Acc:MGI:1096360]
1694	2	Enpp4	0.583967	0.383	0.098	2.75e-33	4.23e-29	ectonucleotide pyrophosphatase/phosphodiesterase 4 [Source:MGI Symbol;Acc:MGI:2682634]
1695	2	Arhgef7	0.519001	0.418	0.118	2.84e-33	4.37e-29	Rho guanine nucleotide exchange factor (GEF7) [Source:MGI Symbol;Acc:MGI:1860493]
1696	2	Ifi35	0.682188	0.556	0.218	4.33e-33	6.66e-29	interferon-induced protein 35 [Source:MGI Symbol;Acc:MGI:1917360]
1697	2	Tns1	0.69683	0.791	0.476	4.89e-33	7.52e-29	tensin 1 [Source:MGI Symbol;Acc:MGI:104552]
1698	2	Slc28a2	0.449558	0.342	0.074	5.44e-33	8.36e-29	solute carrier family 28 (sodium-coupled nucleoside transporter), member 2 [Source:MGI Symbol;Acc:MGI:1913105]
1699	2	Nudt4	0.827736	0.597	0.255	7.33e-33	1.13e-28	nudix (nucleoside diphosphate linked moiety X)-type motif 4 [Source:MGI Symbol;Acc:MGI:1918457]
1700	2	Igfbp7	0.577253	0.99	0.469	7.39e-33	1.14e-28	insulin-like growth factor binding protein 7 [Source:MGI Symbol;Acc:MGI:1352480]
1701	2	Grap	0.644887	0.49	0.162	3.62e-32	5.56e-28	GRB2-related adaptor protein [Source:MGI Symbol;Acc:MGI:1918770]
1702	2	Ndufa8	0.658539	0.77	0.532	4.08e-32	6.26e-28	NADH:ubiquinone oxidoreductase subunit A8 [Source:MGI Symbol;Acc:MGI:1915625]
1703	2	Fmo1	0.671526	0.485	0.164	4.34e-32	6.68e-28	flavin containing monooxygenase 1 [Source:MGI Symbol;Acc:MGI:1310002]
1704	2	Fmnl3	0.381764	0.26	0.044	9.23e-32	1.42e-27	formin-like 3 [Source:MGI Symbol;Acc:MGI:109569]
1705	2	Dennd5b	0.567505	0.393	0.109	3.79e-31	5.82e-27	DENN/MADD domain containing 5B [Source:MGI Symbol;Acc:MGI:2444273]
1706	2	Col4a1	0.359692	0.949	0.41	4.41e-31	6.78e-27	collagen, type IV, alpha 1 [Source:MGI Symbol;Acc:MGI:88454]
1707	2	Pitpnc1	0.58383	0.526	0.195	7.91e-31	1.22e-26	phosphatidylinositol transfer protein, cytoplasmic 1 [Source:MGI Symbol;Acc:MGI:1919045]
1708	2	Spry1	0.695482	0.531	0.191	9.85e-31	1.51e-26	sprouty RTK signaling antagonist 1 [Source:MGI Symbol;Acc:MGI:1345139]
1709	2	Ly6a	0.586018	0.934	0.449	2.42e-30	3.72e-26	lymphocyte antigen 6 complex, locus A [Source:MGI Symbol;Acc:MGI:107527]
1710	2	H2-Q4	0.519766	0.541	0.201	2.57e-30	3.94e-26	histocompatibility 2, Q region locus 4 [Source:MGI Symbol;Acc:MGI:95933]
1711	2	Csf2rb	0.612921	0.469	0.152	3.25e-30	4.99e-26	colony stimulating factor 2 receptor, beta, low-affinity (granulocyte-macrophage) [Source:MGI Symbol;Acc:MGI:1339759]
1712	2	Cers4	0.561088	0.474	0.159	3.43e-30	5.28e-26	ceramide synthase 4 [Source:MGI Symbol;Acc:MGI:1914510]
1713	2	Dynll1	0.55105	0.934	0.831	7.15e-30	1.1e-25	dynein light chain LC8-type 1 [Source:MGI Symbol;Acc:MGI:1861457]
1714	2	Map4	0.680299	0.602	0.282	7.72e-30	1.19e-25	microtubule-associated protein 4 [Source:MGI Symbol;Acc:MGI:97178]
1715	2	Bnip2	0.604883	0.77	0.474	1.18e-29	1.81e-25	BCL2/adenovirus E1B interacting protein 2 [Source:MGI Symbol;Acc:MGI:109327]
1716	2	Chchd2	0.364536	0.964	0.915	2.3e-29	3.53e-25	coiled-coil-helix-coiled-coil-helix domain containing 2 [Source:MGI Symbol;Acc:MGI:1261428]
1717	2	Ier2	0.585175	0.944	0.803	2.35e-29	3.62e-25	immediate early response 2 [Source:MGI Symbol;Acc:MGI:104815]
1718	2	Dlc1	0.571538	0.633	0.27	2.62e-29	4.03e-25	deleted in liver cancer 1 [Source:MGI Symbol;Acc:MGI:1354949]
1719	2	Mgat4a	0.391436	0.347	0.085	2.63e-29	4.04e-25	mannoside acetylglucosaminyltransferase 4, isoenzyme A [Source:MGI Symbol;Acc:MGI:2662992]
1720	2	Taf7	0.608432	0.51	0.203	7.03e-29	1.08e-24	TATA-box binding protein associated factor 7 [Source:MGI Symbol;Acc:MGI:1346348]
1721	2	Plcb1	0.414436	0.276	0.055	8.01e-29	1.23e-24	phospholipase C, beta 1 [Source:MGI Symbol;Acc:MGI:97613]
1722	2	Cep85l	0.327831	0.26	0.048	8.23e-29	1.27e-24	centrosomal protein 85-like [Source:MGI Symbol;Acc:MGI:3642684]
1723	2	Rasal2	0.519084	0.408	0.124	1.5e-28	2.31e-24	RAS protein activator like 2 [Source:MGI Symbol;Acc:MGI:2443881]
1724	2	Myl12b	0.55366	0.837	0.623	1.53e-28	2.35e-24	myosin, light chain 12B, regulatory [Source:MGI Symbol;Acc:MGI:107494]
1725	2	Chst7	0.480371	0.27	0.055	1.82e-28	2.8e-24	carbohydrate (N-acetylglucosamino) sulfotransferase 7 [Source:MGI Symbol;Acc:MGI:1891767]
1726	2	Ppm1f	0.434926	0.281	0.059	1.86e-28	2.86e-24	protein phosphatase 1F (PP2C domain containing) [Source:MGI Symbol;Acc:MGI:1918464]
1727	2	Ctnna1	0.719462	0.719	0.469	2.21e-28	3.39e-24	catenin (cadherin associated protein), alpha 1 [Source:MGI Symbol;Acc:MGI:88274]
1728	2	Egln1	0.642898	0.633	0.337	4.32e-28	6.63e-24	egl-9 family hypoxia-inducible factor 1 [Source:MGI Symbol;Acc:MGI:1932286]
1729	2	Mcc	0.512218	0.398	0.123	4.63e-28	7.11e-24	mutated in colorectal cancers [Source:MGI Symbol;Acc:MGI:96930]
1730	2	Ppp1r13b	0.365717	0.276	0.055	5e-28	7.68e-24	protein phosphatase 1, regulatory subunit 13B [Source:MGI Symbol;Acc:MGI:1336199]
1731	2	Plcg1	0.476415	0.296	0.067	5.71e-28	8.77e-24	phospholipase C, gamma 1 [Source:MGI Symbol;Acc:MGI:97615]
1732	2	Ptger4	0.643996	0.515	0.198	5.79e-28	8.9e-24	prostaglandin E receptor 4 (subtype EP4) [Source:MGI Symbol;Acc:MGI:104311]
1733	2	Dusp3	0.672097	0.719	0.445	1.09e-27	1.68e-23	dual specificity phosphatase 3 (vaccinia virus phosphatase VH1-related) [Source:MGI Symbol;Acc:MGI:1919599]
1734	2	Anp32a	0.608599	0.77	0.515	1.27e-27	1.95e-23	acidic (leucine-rich) nuclear phosphoprotein 32 family, member A [Source:MGI Symbol;Acc:MGI:108447]
1735	2	Sypl	0.588644	0.628	0.326	2.71e-27	4.16e-23	synaptophysin-like protein [Source:MGI Symbol;Acc:MGI:108081]
1736	2	Tmsb4x	0.345488	1	0.982	3.22e-27	4.95e-23	thymosin, beta 4, X chromosome [Source:MGI Symbol;Acc:MGI:99510]
1737	2	Sertad1	0.747943	0.765	0.523	3.42e-27	5.25e-23	SERTA domain containing 1 [Source:MGI Symbol;Acc:MGI:1913438]
1738	2	Hhex	0.417638	0.296	0.066	3.47e-27	5.33e-23	hematopoietically expressed homeobox [Source:MGI Symbol;Acc:MGI:96086]
1739	2	Tsc22d1	0.661868	0.679	0.359	4.71e-27	7.24e-23	TSC22 domain family, member 1 [Source:MGI Symbol;Acc:MGI:109127]
1740	2	Dnaja1	0.468621	0.923	0.806	4.98e-27	7.65e-23	DnaJ heat shock protein family (Hsp40) member A1 [Source:MGI Symbol;Acc:MGI:1270129]
1741	2	Cd38	0.458069	0.434	0.133	7.5e-27	1.15e-22	CD38 antigen [Source:MGI Symbol;Acc:MGI:107474]
1742	2	Grasp	0.484839	0.418	0.133	1.07e-26	1.65e-22	GRP1 (general receptor for phosphoinositides 1)-associated scaffold protein [Source:MGI Symbol;Acc:MGI:1860303]
1743	2	Tmem88	0.591292	0.658	0.348	1.22e-26	1.87e-22	transmembrane protein 88 [Source:MGI Symbol;Acc:MGI:1914270]
1744	2	Ceacam1	0.353769	0.26	0.052	1.23e-26	1.9e-22	carcinoembryonic antigen-related cell adhesion molecule 1 [Source:MGI Symbol;Acc:MGI:1347245]
1745	2	Myadm	0.76728	0.73	0.456	1.31e-26	2.01e-22	myeloid-associated differentiation marker [Source:MGI Symbol;Acc:MGI:1355332]
1746	2	Myadm	0.76728	0.73	0.456	1.31e-26	2.01e-22	Myeloid-associated differentiation marker [Source:UniProtKB/Swiss-Prot;Acc:O35682]
1747	2	Impdh1	0.471924	0.378	0.11	1.39e-26	2.14e-22	inosine monophosphate dehydrogenase 1 [Source:MGI Symbol;Acc:MGI:96567]
1748	2	Papss2	0.458577	0.372	0.111	2.31e-26	3.55e-22	3'-phosphoadenosine 5'-phosphosulfate synthase 2 [Source:MGI Symbol;Acc:MGI:1330223]
1749	2	Gpr160	0.459726	0.306	0.075	4.39e-26	6.75e-22	G protein-coupled receptor 160 [Source:MGI Symbol;Acc:MGI:1919112]
1750	2	Mapk12	0.409685	0.27	0.059	5.16e-26	7.94e-22	mitogen-activated protein kinase 12 [Source:MGI Symbol;Acc:MGI:1353438]
1751	2	Arhgef28	0.464268	0.347	0.097	5.76e-26	8.84e-22	Rho guanine nucleotide exchange factor (GEF) 28 [Source:MGI Symbol;Acc:MGI:1346016]
1752	2	Mrrf	0.421417	0.327	0.088	1.33e-25	2.04e-21	mitochondrial ribosome recycling factor [Source:MGI Symbol;Acc:MGI:1915121]
1753	2	Nfib	0.529937	0.77	0.391	1.71e-25	2.63e-21	nuclear factor I/B [Source:MGI Symbol;Acc:MGI:103188]
1754	2	Hspa2	0.478294	0.393	0.124	2.65e-25	4.07e-21	heat shock protein 2 [Source:MGI Symbol;Acc:MGI:96243]
1755	2	Sparc	0.355126	0.99	0.516	2.83e-25	4.34e-21	secreted acidic cysteine rich glycoprotein [Source:MGI Symbol;Acc:MGI:98373]
1756	2	Gbp2	0.472838	0.459	0.171	3.07e-25	4.71e-21	guanylate binding protein 2 [Source:MGI Symbol;Acc:MGI:102772]
1757	2	Mapk3	0.647909	0.658	0.39	5.44e-25	8.36e-21	mitogen-activated protein kinase 3 [Source:MGI Symbol;Acc:MGI:1346859]
1758	2	Sema4c	0.563288	0.357	0.109	5.87e-25	9.02e-21	sema domain, immunoglobulin domain (Ig), transmembrane domain (TM) and short cytoplasmic domain, (semaphorin) 4C [Source:MGI Symbol;Acc:MGI:109252]
1759	2	Hras	0.603917	0.628	0.344	6.09e-25	9.36e-21	Harvey rat sarcoma virus oncogene [Source:MGI Symbol;Acc:MGI:96224]
1760	2	Hspg2	0.48602	0.719	0.354	6.49e-25	9.97e-21	perlecan (heparan sulfate proteoglycan 2) [Source:MGI Symbol;Acc:MGI:96257]
1761	2	Qk	0.544518	0.816	0.629	8.39e-25	1.29e-20	quaking [Source:MGI Symbol;Acc:MGI:97837]
1762	2	Cyp2d22	0.375198	0.316	0.084	9.81e-25	1.51e-20	cytochrome P450, family 2, subfamily d, polypeptide 22 [Source:MGI Symbol;Acc:MGI:1929474]
1763	2	Psmb8	0.424356	0.842	0.584	1.4e-24	2.15e-20	proteasome (prosome, macropain) subunit, beta type 8 (large multifunctional peptidase 7) [Source:MGI Symbol;Acc:MGI:1346527]
1764	2	Tmed5	0.580693	0.786	0.543	1.48e-24	2.27e-20	transmembrane p24 trafficking protein 5 [Source:MGI Symbol;Acc:MGI:1921586]
1765	2	Cdc42bpa	0.495458	0.439	0.161	1.85e-24	2.85e-20	CDC42 binding protein kinase alpha [Source:MGI Symbol;Acc:MGI:2441841]
1766	2	Klf7	0.662627	0.704	0.432	2.26e-24	3.47e-20	Kruppel-like factor 7 (ubiquitous) [Source:MGI Symbol;Acc:MGI:1935151]
1767	2	Tecpr1	0.445171	0.449	0.161	2.32e-24	3.57e-20	tectonin beta-propeller repeat containing 1 [Source:MGI Symbol;Acc:MGI:1917631]
1768	2	Lipe	0.422788	0.332	0.092	3e-24	4.61e-20	lipase, hormone sensitive [Source:MGI Symbol;Acc:MGI:96790]
1769	2	Xiap	0.62429	0.622	0.354	3.4e-24	5.23e-20	X-linked inhibitor of apoptosis [Source:MGI Symbol;Acc:MGI:107572]
1770	2	Elovl5	0.518427	0.434	0.159	5.58e-24	8.57e-20	ELOVL family member 5, elongation of long chain fatty acids (yeast) [Source:MGI Symbol;Acc:MGI:1916051]
1771	2	Gnb4	0.525925	0.454	0.172	5.83e-24	8.97e-20	guanine nucleotide binding protein (G protein), beta 4 [Source:MGI Symbol;Acc:MGI:104581]
1772	2	Map4k3	0.446327	0.342	0.101	5.84e-24	8.97e-20	mitogen-activated protein kinase kinase kinase kinase 3 [Source:MGI Symbol;Acc:MGI:2154405]
1773	2	Trim24	0.592866	0.449	0.181	9.65e-24	1.48e-19	tripartite motif-containing 24 [Source:MGI Symbol;Acc:MGI:109275]
1774	2	Mospd2	0.509484	0.454	0.18	1.26e-23	1.94e-19	motile sperm domain containing 2 [Source:MGI Symbol;Acc:MGI:1924013]
1775	2	S100a16	0.476955	0.776	0.382	1.99e-23	3.06e-19	S100 calcium binding protein A16 [Source:MGI Symbol;Acc:MGI:1915110]
1776	2	Ptprg	0.485483	0.357	0.116	4.09e-23	6.29e-19	protein tyrosine phosphatase, receptor type, G [Source:MGI Symbol;Acc:MGI:97814]
1777	2	Tmod3	0.584649	0.689	0.424	4.38e-23	6.73e-19	tropomodulin 3 [Source:MGI Symbol;Acc:MGI:1355315]
1778	2	Srgn	0.37378	0.913	0.527	5.29e-23	8.12e-19	serglycin [Source:MGI Symbol;Acc:MGI:97756]
1779	2	Abcb1b	0.423804	0.372	0.12	5.85e-23	8.99e-19	ATP-binding cassette, sub-family B (MDR/TAP), member 1B [Source:MGI Symbol;Acc:MGI:97568]
1780	2	Cpd	0.547948	0.546	0.264	6.59e-23	1.01e-18	carboxypeptidase D [Source:MGI Symbol;Acc:MGI:107265]
1781	2	Cbfa2t3	0.412475	0.449	0.163	1.28e-22	1.97e-18	CBFA2/RUNX1 translocation partner 3 [Source:MGI Symbol;Acc:MGI:1338013]
1782	2	Kctd12b	0.567537	0.383	0.136	1.53e-22	2.35e-18	potassium channel tetramerisation domain containing 12b [Source:MGI Symbol;Acc:MGI:2444667]
1783	2	Pde4b	0.403193	0.49	0.188	1.95e-22	2.99e-18	phosphodiesterase 4B, cAMP specific [Source:MGI Symbol;Acc:MGI:99557]
1784	2	Mef2c	0.499157	0.684	0.359	3.41e-22	5.24e-18	myocyte enhancer factor 2C [Source:MGI Symbol;Acc:MGI:99458]
1785	2	Kctd10	0.525044	0.485	0.216	3.71e-22	5.71e-18	potassium channel tetramerisation domain containing 10 [Source:MGI Symbol;Acc:MGI:2141207]
1786	2	Gbp7	0.657797	0.51	0.237	4.57e-22	7.02e-18	guanylate binding protein 7 [Source:MGI Symbol;Acc:MGI:2444421]
1787	2	Itgb1	0.506245	0.862	0.727	4.89e-22	7.51e-18	integrin beta 1 (fibronectin receptor beta) [Source:MGI Symbol;Acc:MGI:96610]
1788	2	Wasf2	0.553338	0.776	0.581	6.84e-22	1.05e-17	WAS protein family, member 2 [Source:MGI Symbol;Acc:MGI:1098641]
1789	2	Mxd4	0.554619	0.76	0.534	6.89e-22	1.06e-17	Max dimerization protein 4 [Source:MGI Symbol;Acc:MGI:104991]
1790	2	Rasd1	0.337226	0.26	0.062	9.26e-22	1.42e-17	RAS, dexamethasone-induced 1 [Source:MGI Symbol;Acc:MGI:1270848]
1791	2	Adarb1	0.469047	0.306	0.09	9.48e-22	1.46e-17	adenosine deaminase, RNA-specific, B1 [Source:MGI Symbol;Acc:MGI:891999]
1792	2	Ccny	0.428815	0.454	0.192	1.03e-21	1.59e-17	cyclin Y [Source:MGI Symbol;Acc:MGI:1915224]
1793	2	Cebpg	0.611558	0.602	0.338	1.4e-21	2.15e-17	CCAAT/enhancer binding protein (C/EBP), gamma [Source:MGI Symbol;Acc:MGI:104982]
1794	2	Myo18a	0.414537	0.337	0.105	1.81e-21	2.79e-17	myosin XVIIIA [Source:MGI Symbol;Acc:MGI:2667185]
1795	2	Filip1l	0.587877	0.602	0.33	1.85e-21	2.84e-17	filamin A interacting protein 1-like [Source:MGI Symbol;Acc:MGI:1925999]
1796	2	Nfe2l1	0.521141	0.689	0.429	2.84e-21	4.36e-17	nuclear factor, erythroid derived 2,-like 1 [Source:MGI Symbol;Acc:MGI:99421]
1797	2	Pls3	0.556353	0.464	0.205	3.41e-21	5.25e-17	plastin 3 (T-isoform) [Source:MGI Symbol;Acc:MGI:104807]
1798	2	Adipor1	0.515635	0.561	0.292	3.47e-21	5.33e-17	adiponectin receptor 1 [Source:MGI Symbol;Acc:MGI:1919924]
1799	2	Id3	0.381493	0.796	0.448	5.16e-21	7.92e-17	inhibitor of DNA binding 3 [Source:MGI Symbol;Acc:MGI:96398]
1800	2	Isg15	0.605246	0.439	0.173	5.59e-21	8.6e-17	ISG15 ubiquitin-like modifier [Source:MGI Symbol;Acc:MGI:1855694]
1801	2	Lrrc8c	0.538772	0.454	0.193	5.62e-21	8.64e-17	leucine rich repeat containing 8 family, member C [Source:MGI Symbol;Acc:MGI:2140839]
1802	2	Reep3	0.512635	0.73	0.538	6.13e-21	9.43e-17	receptor accessory protein 3 [Source:MGI Symbol;Acc:MGI:88930]
1803	2	Tjp2	0.358407	0.255	0.065	6.15e-21	9.46e-17	tight junction protein 2 [Source:MGI Symbol;Acc:MGI:1341872]
1804	2	Oaz2	0.572957	0.546	0.27	7.27e-21	1.12e-16	ornithine decarboxylase antizyme 2 [Source:MGI Symbol;Acc:MGI:109492]
1805	2	Pdlim1	0.595519	0.622	0.349	8.6e-21	1.32e-16	PDZ and LIM domain 1 (elfin) [Source:MGI Symbol;Acc:MGI:1860611]
1806	2	Arhgef12	0.561078	0.643	0.373	1.19e-20	1.82e-16	Rho guanine nucleotide exchange factor (GEF) 12 [Source:MGI Symbol;Acc:MGI:1916882]
1807	2	Auts2	0.522128	0.423	0.168	1.53e-20	2.35e-16	autism susceptibility candidate 2 [Source:MGI Symbol;Acc:MGI:1919847]
1808	2	Anxa3	0.41072	0.776	0.501	2.28e-20	3.51e-16	annexin A3 [Source:MGI Symbol;Acc:MGI:1201378]
1809	2	Jund	0.45149	0.939	0.884	2.96e-20	4.54e-16	jun D proto-oncogene [Source:MGI Symbol;Acc:MGI:96648]
1810	2	Sox4	0.44275	0.383	0.135	3.56e-20	5.47e-16	SRY (sex determining region Y)-box 4 [Source:MGI Symbol;Acc:MGI:98366]
1811	2	Itpr1	0.367509	0.383	0.137	3.95e-20	6.07e-16	inositol 1,4,5-trisphosphate receptor 1 [Source:MGI Symbol;Acc:MGI:96623]
1812	2	Xaf1	0.389093	0.321	0.102	4.39e-20	6.74e-16	XIAP associated factor 1 [Source:MGI Symbol;Acc:MGI:3772572]
1813	2	Adipor2	0.584386	0.51	0.25	5.48e-20	8.43e-16	adiponectin receptor 2 [Source:MGI Symbol;Acc:MGI:93830]
1814	2	Mast4	0.575671	0.485	0.227	5.58e-20	8.58e-16	microtubule associated serine/threonine kinase family member 4 [Source:MGI Symbol;Acc:MGI:1918885]
1815	2	Galnt15	0.426062	0.474	0.203	5.67e-20	8.71e-16	polypeptide N-acetylgalactosaminyltransferase 15 [Source:MGI Symbol;Acc:MGI:1926004]
1816	2	Epn2	0.462895	0.378	0.144	5.7e-20	8.76e-16	epsin 2 [Source:MGI Symbol;Acc:MGI:1333766]
1817	2	Rasgrp2	0.405585	0.444	0.174	6.42e-20	9.87e-16	RAS, guanyl releasing protein 2 [Source:MGI Symbol;Acc:MGI:1333849]
1818	2	Ndufc2	0.49237	0.75	0.587	8.56e-20	1.31e-15	NADH:ubiquinone oxidoreductase subunit C2 [Source:MGI Symbol;Acc:MGI:1344370]
1819	2	H2-T22	0.484266	0.566	0.288	1.61e-19	2.47e-15	histocompatibility 2, T region locus 22 [Source:MGI Symbol;Acc:MGI:95956]
1820	2	Akap12	0.517125	0.617	0.305	2.2e-19	3.39e-15	A kinase (PRKA) anchor protein (gravin) 12 [Source:MGI Symbol;Acc:MGI:1932576]
1821	2	Ktn1	0.457173	0.51	0.248	2.51e-19	3.85e-15	kinectin 1 [Source:MGI Symbol;Acc:MGI:109153]
1822	2	Ptbp3	0.550443	0.704	0.476	4.38e-19	6.73e-15	polypyrimidine tract binding protein 3 [Source:MGI Symbol;Acc:MGI:1923334]
1823	2	Sgms1	0.445239	0.515	0.25	7.85e-19	1.21e-14	sphingomyelin synthase 1 [Source:MGI Symbol;Acc:MGI:2444110]
1824	2	Chmp5	0.527261	0.638	0.405	9.93e-19	1.53e-14	charged multivesicular body protein 5 [Source:MGI Symbol;Acc:MGI:1924209]
1825	2	Clic4	0.509327	0.75	0.543	1.34e-18	2.06e-14	chloride intracellular channel 4 (mitochondrial) [Source:MGI Symbol;Acc:MGI:1352754]
1826	2	Pxdn	0.457638	0.449	0.199	1.45e-18	2.23e-14	peroxidasin [Source:MGI Symbol;Acc:MGI:1916925]
1827	2	Macf1	0.445475	0.75	0.545	1.78e-18	2.73e-14	microtubule-actin crosslinking factor 1 [Source:MGI Symbol;Acc:MGI:108559]
1828	2	Csrp1	0.471297	0.556	0.293	2.12e-18	3.26e-14	cysteine and glycine-rich protein 1 [Source:MGI Symbol;Acc:MGI:88549]
1829	2	Znrf1	0.424861	0.388	0.152	2.63e-18	4.05e-14	zinc and ring finger 1 [Source:MGI Symbol;Acc:MGI:2177308]
1830	2	Sppl2a	0.514289	0.668	0.441	2.87e-18	4.41e-14	signal peptide peptidase like 2A [Source:MGI Symbol;Acc:MGI:1913802]
1831	2	Rgs3	0.416552	0.321	0.111	2.89e-18	4.45e-14	regulator of G-protein signaling 3 [Source:MGI Symbol;Acc:MGI:1354734]
1832	2	Fkbp1a	0.509435	0.806	0.665	2.91e-18	4.48e-14	FK506 binding protein 1a [Source:MGI Symbol;Acc:MGI:95541]
1833	2	Tpst1	0.447313	0.566	0.298	3.5e-18	5.38e-14	protein-tyrosine sulfotransferase 1 [Source:MGI Symbol;Acc:MGI:1298231]
1834	2	Nrp2	0.513845	0.551	0.286	3.64e-18	5.59e-14	neuropilin 2 [Source:MGI Symbol;Acc:MGI:1100492]
1835	2	Mbnl2	0.487365	0.689	0.495	3.76e-18	5.77e-14	muscleblind like splicing factor 2 [Source:MGI Symbol;Acc:MGI:2145597]
1836	2	Acox1	0.479321	0.429	0.188	4.08e-18	6.27e-14	acyl-Coenzyme A oxidase 1, palmitoyl [Source:MGI Symbol;Acc:MGI:1330812]
1837	2	Itpr2	0.506297	0.454	0.209	4.45e-18	6.84e-14	inositol 1,4,5-triphosphate receptor 2 [Source:MGI Symbol;Acc:MGI:99418]
1838	2	Dusp6	0.363353	0.367	0.138	5.06e-18	7.78e-14	dual specificity phosphatase 6 [Source:MGI Symbol;Acc:MGI:1914853]
1839	2	Klf2	0.436095	0.944	0.71	6.64e-18	1.02e-13	Kruppel-like factor 2 (lung) [Source:MGI Symbol;Acc:MGI:1342772]
1840	2	Pfkfb3	0.397756	0.296	0.097	7.79e-18	1.2e-13	6-phosphofructo-2-kinase/fructose-2,6-biphosphatase 3 [Source:MGI Symbol;Acc:MGI:2181202]
1841	2	Mprip	0.517565	0.628	0.395	1.01e-17	1.55e-13	myosin phosphatase Rho interacting protein [Source:MGI Symbol;Acc:MGI:1349438]
1842	2	Cyth1	0.449159	0.423	0.184	1.04e-17	1.6e-13	cytohesin 1 [Source:MGI Symbol;Acc:MGI:1334257]
1843	2	Rhob	0.491949	0.663	0.421	1.05e-17	1.62e-13	ras homolog family member B [Source:MGI Symbol;Acc:MGI:107949]
1844	2	Flnb	0.395293	0.398	0.167	1.36e-17	2.09e-13	filamin, beta [Source:MGI Symbol;Acc:MGI:2446089]
1845	2	Cdc42bpb	0.430852	0.423	0.198	1.58e-17	2.43e-13	CDC42 binding protein kinase beta [Source:MGI Symbol;Acc:MGI:2136459]
1846	2	Fas	0.417079	0.291	0.097	2.04e-17	3.13e-13	Fas (TNF receptor superfamily member 6) [Source:MGI Symbol;Acc:MGI:95484]
1847	2	Arhgap18	0.590218	0.587	0.357	2.27e-17	3.49e-13	Rho GTPase activating protein 18 [Source:MGI Symbol;Acc:MGI:1921160]
1848	2	Ccser2	0.440093	0.48	0.235	2.46e-17	3.78e-13	coiled-coil serine rich 2 [Source:MGI Symbol;Acc:MGI:101859]
1849	2	Hdac7	0.461684	0.408	0.178	2.95e-17	4.53e-13	histone deacetylase 7 [Source:MGI Symbol;Acc:MGI:1891835]
1850	2	Rras	0.483098	0.694	0.451	4.05e-17	6.23e-13	related RAS viral (r-ras) oncogene [Source:MGI Symbol;Acc:MGI:98179]
1851	2	Phldb2	0.426177	0.337	0.126	4.66e-17	7.16e-13	pleckstrin homology like domain, family B, member 2 [Source:MGI Symbol;Acc:MGI:2444981]
1852	2	Gopc	0.410633	0.378	0.156	4.9e-17	7.52e-13	golgi associated PDZ and coiled-coil motif containing [Source:MGI Symbol;Acc:MGI:2149946]
1853	2	Jun	0.465803	0.954	0.776	6.53e-17	1e-12	jun proto-oncogene [Source:MGI Symbol;Acc:MGI:96646]
1854	2	Wwc2	0.407097	0.388	0.164	7.38e-17	1.13e-12	WW, C2 and coiled-coil domain containing 2 [Source:MGI Symbol;Acc:MGI:1261872]
1855	2	Cds2	0.417257	0.393	0.172	8.77e-17	1.35e-12	CDP-diacylglycerol synthase (phosphatidate cytidylyltransferase) 2 [Source:MGI Symbol;Acc:MGI:1332236]
1856	2	Ddx5	0.318147	0.99	0.932	1.12e-16	1.73e-12	DEAD (Asp-Glu-Ala-Asp) box polypeptide 5 [Source:MGI Symbol;Acc:MGI:105037]
1857	2	Mbd2	0.436751	0.704	0.519	1.17e-16	1.8e-12	methyl-CpG binding domain protein 2 [Source:MGI Symbol;Acc:MGI:1333813]
1858	2	Tpst2	0.434289	0.485	0.246	1.83e-16	2.81e-12	protein-tyrosine sulfotransferase 2 [Source:MGI Symbol;Acc:MGI:1309516]
1859	2	Fbxl18	0.479808	0.459	0.218	2.94e-16	4.52e-12	F-box and leucine-rich repeat protein 18 [Source:MGI Symbol;Acc:MGI:2444450]
1860	2	Gm26802	0.406898	0.449	0.201	2.98e-16	4.58e-12	predicted gene, 26802 [Source:MGI Symbol;Acc:MGI:5477296]
1861	2	Plxnd1	0.443165	0.536	0.286	3.15e-16	4.84e-12	plexin D1 [Source:MGI Symbol;Acc:MGI:2154244]
1862	2	Zfp664	0.404869	0.362	0.153	3.19e-16	4.9e-12	zinc finger protein 664 [Source:MGI Symbol;Acc:MGI:2442505]
1863	2	Lbr	0.429186	0.439	0.206	4.16e-16	6.4e-12	lamin B receptor [Source:MGI Symbol;Acc:MGI:2138281]
1864	2	Tsnax	0.448729	0.444	0.223	4.79e-16	7.35e-12	translin-associated factor X [Source:MGI Symbol;Acc:MGI:1855672]
1865	2	Arid5b	0.482581	0.464	0.24	5.42e-16	8.33e-12	AT rich interactive domain 5B (MRF1-like) [Source:MGI Symbol;Acc:MGI:2175912]
1866	2	Cpne8	0.449839	0.398	0.179	6.19e-16	9.51e-12	copine VIII [Source:MGI Symbol;Acc:MGI:1914121]
1867	2	Arpc3	0.389482	0.918	0.852	6.47e-16	9.95e-12	actin related protein 2/3 complex, subunit 3 [Source:MGI Symbol;Acc:MGI:1928375]
1868	2	Hexim1	0.488022	0.653	0.442	1.05e-15	1.61e-11	hexamethylene bis-acetamide inducible 1 [Source:MGI Symbol;Acc:MGI:2385923]
1869	2	Tmem59	0.414086	0.862	0.721	1.29e-15	1.99e-11	transmembrane protein 59 [Source:MGI Symbol;Acc:MGI:1929278]
1870	2	Ptk2	0.320985	0.321	0.122	1.3e-15	2e-11	PTK2 protein tyrosine kinase 2 [Source:MGI Symbol;Acc:MGI:95481]
1871	2	Piezo1	0.395293	0.362	0.154	1.4e-15	2.15e-11	piezo-type mechanosensitive ion channel component 1 [Source:MGI Symbol;Acc:MGI:3603204]
1872	2	Ssh2	0.426213	0.577	0.338	1.77e-15	2.73e-11	slingshot protein phosphatase 2 [Source:MGI Symbol;Acc:MGI:2679255]
1873	2	Tpm4	0.450003	0.796	0.648	2.06e-15	3.17e-11	tropomyosin 4 [Source:MGI Symbol;Acc:MGI:2449202]
1874	2	Gm12216	0.354089	0.316	0.121	3.18e-15	4.88e-11	predicted gene 12216 [Source:MGI Symbol;Acc:MGI:3650088]
1875	2	Gpx4	0.275115	0.883	0.794	3.44e-15	5.28e-11	glutathione peroxidase 4 [Source:MGI Symbol;Acc:MGI:104767]
1876	2	S100a13	0.339795	0.883	0.736	3.82e-15	5.86e-11	S100 calcium binding protein A13 [Source:MGI Symbol;Acc:MGI:109581]
1877	2	Ppic	0.409132	0.566	0.299	3.95e-15	6.07e-11	peptidylprolyl isomerase C [Source:MGI Symbol;Acc:MGI:97751]
1878	2	Prnp	0.571826	0.546	0.309	4.02e-15	6.18e-11	prion protein [Source:MGI Symbol;Acc:MGI:97769]
1879	2	Casp8	0.398696	0.49	0.258	4.1e-15	6.31e-11	caspase 8 [Source:MGI Symbol;Acc:MGI:1261423]
1880	2	Lrrc8a	0.447946	0.372	0.165	6.36e-15	9.77e-11	leucine rich repeat containing 8A VRAC subunit A [Source:MGI Symbol;Acc:MGI:2652847]
1881	2	Trp53inp2	0.330944	0.291	0.108	7.86e-15	1.21e-10	transformation related protein 53 inducible nuclear protein 2 [Source:MGI Symbol;Acc:MGI:1915978]
1882	2	Actn1	0.341403	0.255	0.086	9.31e-15	1.43e-10	actinin, alpha 1 [Source:MGI Symbol;Acc:MGI:2137706]
1883	2	Smim10l1	0.432383	0.561	0.345	9.47e-15	1.46e-10	small integral membrane protein 10 like 1 [Source:MGI Symbol;Acc:MGI:1914379]
1884	2	Fam53b	0.37613	0.362	0.152	1.1e-14	1.69e-10	family with sequence similarity 53, member B [Source:MGI Symbol;Acc:MGI:1925188]
1885	2	Gpr146	0.394525	0.342	0.139	1.43e-14	2.2e-10	G protein-coupled receptor 146 [Source:MGI Symbol;Acc:MGI:1933113]
1886	2	Kif5b	0.40003	0.786	0.618	1.77e-14	2.72e-10	kinesin family member 5B [Source:MGI Symbol;Acc:MGI:1098268]
1887	2	Psmb10	0.435506	0.668	0.48	2.62e-14	4.02e-10	proteasome (prosome, macropain) subunit, beta type 10 [Source:MGI Symbol;Acc:MGI:1096380]
1888	2	Hmgb1	0.318478	0.888	0.799	2.87e-14	4.4e-10	high mobility group box 1 [Source:MGI Symbol;Acc:MGI:96113]
1889	2	Atp9a	0.307884	0.286	0.105	3.38e-14	5.2e-10	ATPase, class II, type 9A [Source:MGI Symbol;Acc:MGI:1330826]
1890	2	Baz2b	0.470427	0.587	0.391	3.7e-14	5.69e-10	bromodomain adjacent to zinc finger domain, 2B [Source:MGI Symbol;Acc:MGI:2442782]
1891	2	Fcho2	0.44141	0.536	0.311	4.64e-14	7.13e-10	FCH domain only 2 [Source:MGI Symbol;Acc:MGI:3505790]
1892	2	Fbxw2	0.428922	0.48	0.265	5.28e-14	8.12e-10	F-box and WD-40 domain protein 2 [Source:MGI Symbol;Acc:MGI:1353435]
1893	2	Ptms	0.40381	0.786	0.637	5.6e-14	8.61e-10	parathymosin [Source:MGI Symbol;Acc:MGI:1916452]
1894	2	Lzts2	0.373478	0.398	0.192	5.67e-14	8.72e-10	leucine zipper, putative tumor suppressor 2 [Source:MGI Symbol;Acc:MGI:2385095]
1895	2	Stx12	0.382472	0.48	0.266	5.98e-14	9.18e-10	syntaxin 12 [Source:MGI Symbol;Acc:MGI:1931027]
1896	2	Pkn2	0.437789	0.602	0.406	6.67e-14	1.02e-09	protein kinase N2 [Source:MGI Symbol;Acc:MGI:109211]
1897	2	Plk3	0.367537	0.342	0.148	7.17e-14	1.1e-09	polo like kinase 3 [Source:MGI Symbol;Acc:MGI:109604]
1898	2	Srsf3	0.32334	0.847	0.748	8.62e-14	1.32e-09	serine/arginine-rich splicing factor 3 [Source:MGI Symbol;Acc:MGI:98285]
1899	2	Psmb9	0.32561	0.566	0.32	9.12e-14	1.4e-09	proteasome (prosome, macropain) subunit, beta type 9 (large multifunctional peptidase 2) [Source:MGI Symbol;Acc:MGI:1346526]
1900	2	Rab11a	0.411584	0.612	0.398	9.88e-14	1.52e-09	RAB11A, member RAS oncogene family [Source:MGI Symbol;Acc:MGI:1858202]
1901	2	Tprgl	0.414991	0.668	0.499	1.14e-13	1.75e-09	transformation related protein 63 regulated like [Source:MGI Symbol;Acc:MGI:1915058]
1902	2	Btbd3	0.371863	0.281	0.106	1.2e-13	1.84e-09	BTB (POZ) domain containing 3 [Source:MGI Symbol;Acc:MGI:2385155]
1903	2	Nbeal1	0.424967	0.571	0.372	1.3e-13	1.99e-09	neurobeachin like 1 [Source:MGI Symbol;Acc:MGI:2444343]
1904	2	Mospd1	0.317632	0.276	0.101	1.37e-13	2.11e-09	motile sperm domain containing 1 [Source:MGI Symbol;Acc:MGI:1917630]
1905	2	Rbm18	0.325402	0.352	0.155	1.44e-13	2.21e-09	RNA binding motif protein 18 [Source:MGI Symbol;Acc:MGI:1915139]
1906	2	Vamp3	0.413325	0.449	0.246	1.67e-13	2.57e-09	vesicle-associated membrane protein 3 [Source:MGI Symbol;Acc:MGI:1321389]
1907	2	Tspan4	0.430726	0.505	0.289	1.69e-13	2.59e-09	tetraspanin 4 [Source:MGI Symbol;Acc:MGI:1928097]
1908	2	Fus	0.381623	0.827	0.734	1.75e-13	2.69e-09	fused in sarcoma [Source:MGI Symbol;Acc:MGI:1353633]
1909	2	Hmg20b	0.422191	0.51	0.301	1.87e-13	2.88e-09	high mobility group 20B [Source:MGI Symbol;Acc:MGI:1341190]
1910	2	Spop	0.413915	0.679	0.501	1.9e-13	2.91e-09	speckle-type BTB/POZ protein [Source:MGI Symbol;Acc:MGI:1343085]
1911	2	Hyal2	0.391928	0.291	0.117	2.27e-13	3.49e-09	hyaluronoglucosaminidase 2 [Source:MGI Symbol;Acc:MGI:1196334]
1912	2	Il4ra	0.32885	0.367	0.163	2.8e-13	4.3e-09	interleukin 4 receptor, alpha [Source:MGI Symbol;Acc:MGI:105367]
1913	2	Pcmtd1	0.40524	0.541	0.337	3.13e-13	4.81e-09	protein-L-isoaspartate (D-aspartate) O-methyltransferase domain containing 1 [Source:MGI Symbol;Acc:MGI:2441773]
1914	2	Jam3	0.275727	0.27	0.101	3.15e-13	4.85e-09	junction adhesion molecule 3 [Source:MGI Symbol;Acc:MGI:1933825]
1915	2	9930111J21Rik2	0.667847	0.49	0.284	3.28e-13	5.04e-09	RIKEN cDNA 9930111J21 gene 2 [Source:MGI Symbol;Acc:MGI:3711310]
1916	2	Serpinb9	0.258718	0.311	0.126	3.5e-13	5.38e-09	serine (or cysteine) peptidase inhibitor, clade B, member 9 [Source:MGI Symbol;Acc:MGI:106603]
1917	2	2022-03-02	0.399957	0.673	0.525	3.77e-13	5.8e-09	mitochondrial amidoxime reducing component 2 [Source:MGI Symbol;Acc:MGI:1914497]
1918	2	Ifitm3	0.323414	0.995	0.813	4.57e-13	7.03e-09	interferon induced transmembrane protein 3 [Source:MGI Symbol;Acc:MGI:1913391]
1919	2	Sik1	0.494045	0.454	0.25	5.52e-13	8.48e-09	salt inducible kinase 1 [Source:MGI Symbol;Acc:MGI:104754]
1920	2	Mtus1	0.36446	0.281	0.109	7.49e-13	1.15e-08	mitochondrial tumor suppressor 1 [Source:MGI Symbol;Acc:MGI:2142572]
1921	2	Vamp5	0.359371	0.388	0.187	7.52e-13	1.16e-08	vesicle-associated membrane protein 5 [Source:MGI Symbol;Acc:MGI:1858622]
1922	2	B2m	0.253291	0.974	0.919	7.65e-13	1.17e-08	beta-2 microglobulin [Source:MGI Symbol;Acc:MGI:88127]
1923	2	Hoxa7	0.387375	0.362	0.168	8.28e-13	1.27e-08	homeobox A7 [Source:MGI Symbol;Acc:MGI:96179]
1924	2	St3gal6	0.397259	0.362	0.169	8.42e-13	1.29e-08	ST3 beta-galactoside alpha-2,3-sialyltransferase 6 [Source:MGI Symbol;Acc:MGI:1888707]
1925	2	Git1	0.286157	0.276	0.107	8.79e-13	1.35e-08	GIT ArfGAP 1 [Source:MGI Symbol;Acc:MGI:1927140]
1926	2	Igtp	0.259036	0.26	0.096	9.07e-13	1.39e-08	interferon gamma induced GTPase [Source:MGI Symbol;Acc:MGI:107729]
1927	2	Tmem184b	0.342551	0.316	0.135	1e-12	1.54e-08	transmembrane protein 184b [Source:MGI Symbol;Acc:MGI:2445179]
1928	2	Sec14l1	0.425843	0.541	0.352	1.02e-12	1.57e-08	SEC14-like lipid binding 1 [Source:MGI Symbol;Acc:MGI:1921386]
1929	2	Ebf1	0.312386	0.663	0.373	1.02e-12	1.57e-08	early B cell factor 1 [Source:MGI Symbol;Acc:MGI:95275]
1930	2	Syf2	0.407871	0.638	0.473	1.05e-12	1.62e-08	SYF2 homolog, RNA splicing factor (S. cerevisiae) [Source:MGI Symbol;Acc:MGI:1915842]
1931	2	Ubxn2a	0.307217	0.332	0.144	1.24e-12	1.9e-08	UBX domain protein 2A [Source:MGI Symbol;Acc:MGI:2442310]
1932	2	Sh3glb2	0.391326	0.418	0.216	1.24e-12	1.91e-08	SH3-domain GRB2-like endophilin B2 [Source:MGI Symbol;Acc:MGI:2385131]
1933	2	Cdk17	0.305322	0.286	0.114	2.13e-12	3.28e-08	cyclin-dependent kinase 17 [Source:MGI Symbol;Acc:MGI:97517]
1934	2	Gnpda2	0.35748	0.383	0.188	2.36e-12	3.62e-08	glucosamine-6-phosphate deaminase 2 [Source:MGI Symbol;Acc:MGI:1915230]
1935	2	Cr1l	0.418807	0.602	0.402	2.58e-12	3.97e-08	complement component (3b/4b) receptor 1-like [Source:MGI Symbol;Acc:MGI:88513]
1936	2	Cttnbp2nl	0.387393	0.378	0.187	2.84e-12	4.37e-08	CTTNBP2 N-terminal like [Source:MGI Symbol;Acc:MGI:1933137]
1937	2	Eif4a2	0.379328	0.684	0.511	3.77e-12	5.8e-08	eukaryotic translation initiation factor 4A2 [Source:MGI Symbol;Acc:MGI:106906]
1938	2	Ltbp4	0.45132	0.653	0.387	3.92e-12	6.03e-08	latent transforming growth factor beta binding protein 4 [Source:MGI Symbol;Acc:MGI:1321395]
1939	2	Map4k5	0.346049	0.296	0.127	4e-12	6.14e-08	mitogen-activated protein kinase kinase kinase kinase 5 [Source:MGI Symbol;Acc:MGI:1925503]
1940	2	Tes	0.284996	0.316	0.133	4.16e-12	6.39e-08	testis derived transcript [Source:MGI Symbol;Acc:MGI:105081]
1941	2	Ptpn12	0.354476	0.434	0.236	5.21e-12	8.01e-08	protein tyrosine phosphatase, non-receptor type 12 [Source:MGI Symbol;Acc:MGI:104673]
1942	2	Msn	0.287223	0.786	0.665	5.8e-12	8.91e-08	moesin [Source:MGI Symbol;Acc:MGI:97167]
1943	2	Rassf1	0.340283	0.571	0.367	9.01e-12	1.38e-07	Ras association (RalGDS/AF-6) domain family member 1 [Source:MGI Symbol;Acc:MGI:1928386]
1944	2	Erc1	0.320978	0.255	0.099	9.53e-12	1.46e-07	ELKS/RAB6-interacting/CAST family member 1 [Source:MGI Symbol;Acc:MGI:2151013]
1945	2	Srsf5	0.324021	0.862	0.762	1.02e-11	1.57e-07	serine/arginine-rich splicing factor 5 [Source:MGI Symbol;Acc:MGI:98287]
1946	2	Gnb1	0.36307	0.745	0.625	1.36e-11	2.1e-07	guanine nucleotide binding protein (G protein), beta 1 [Source:MGI Symbol;Acc:MGI:95781]
1947	2	Srsf2	0.373518	0.806	0.731	2.13e-11	3.27e-07	serine/arginine-rich splicing factor 2 [Source:MGI Symbol;Acc:MGI:98284]
1948	2	Gabarapl2	0.353622	0.628	0.463	2.17e-11	3.34e-07	gamma-aminobutyric acid (GABA) A receptor-associated protein-like 2 [Source:MGI Symbol;Acc:MGI:1890602]
1949	2	Slc50a1	0.369603	0.566	0.385	2.31e-11	3.55e-07	solute carrier family 50 (sugar transporter), member 1 [Source:MGI Symbol;Acc:MGI:107417]
1950	2	Spag9	0.332339	0.781	0.667	2.38e-11	3.66e-07	sperm associated antigen 9 [Source:MGI Symbol;Acc:MGI:1918084]
1951	2	Myo6	0.280073	0.255	0.102	2.39e-11	3.68e-07	myosin VI [Source:MGI Symbol;Acc:MGI:104785]
1952	2	Hnrnph3	0.382445	0.362	0.18	2.83e-11	4.35e-07	heterogeneous nuclear ribonucleoprotein H3 [Source:MGI Symbol;Acc:MGI:1926462]
1953	2	Fmo2	0.280919	0.352	0.161	2.84e-11	4.36e-07	flavin containing monooxygenase 2 [Source:MGI Symbol;Acc:MGI:1916776]
1954	2	Jmjd6	0.359285	0.444	0.252	3.12e-11	4.79e-07	jumonji domain containing 6 [Source:MGI Symbol;Acc:MGI:1858910]
1955	2	Dolk	0.441673	0.27	0.113	3.25e-11	5e-07	dolichol kinase [Source:MGI Symbol;Acc:MGI:2677836]
1956	2	Apc	0.316101	0.444	0.248	3.47e-11	5.34e-07	APC, WNT signaling pathway regulator [Source:MGI Symbol;Acc:MGI:88039]
1957	2	Ralgapa1	0.367205	0.281	0.121	3.69e-11	5.67e-07	Ral GTPase activating protein, alpha subunit 1 [Source:MGI Symbol;Acc:MGI:1931050]
1958	2	Gclm	0.362716	0.403	0.219	3.98e-11	6.12e-07	glutamate-cysteine ligase, modifier subunit [Source:MGI Symbol;Acc:MGI:104995]
1959	2	Pgrmc1	0.381791	0.592	0.415	4.39e-11	6.75e-07	progesterone receptor membrane component 1 [Source:MGI Symbol;Acc:MGI:1858305]
1960	2	Stom	0.380845	0.337	0.162	4.56e-11	7.01e-07	stomatin [Source:MGI Symbol;Acc:MGI:95403]
1961	2	Ctbp1	0.371382	0.531	0.354	4.58e-11	7.03e-07	C-terminal binding protein 1 [Source:MGI Symbol;Acc:MGI:1201685]
1962	2	Smc1a	0.378075	0.633	0.493	5.43e-11	8.34e-07	structural maintenance of chromosomes 1A [Source:MGI Symbol;Acc:MGI:1344345]
1963	2	Npr1	0.331663	0.347	0.171	5.66e-11	8.7e-07	natriuretic peptide receptor 1 [Source:MGI Symbol;Acc:MGI:97371]
1964	2	Diaph2	0.370705	0.454	0.265	7.05e-11	1.08e-06	diaphanous related formin 2 [Source:MGI Symbol;Acc:MGI:1858500]
1965	2	Dusp1	0.312063	0.949	0.82	7.61e-11	1.17e-06	dual specificity phosphatase 1 [Source:MGI Symbol;Acc:MGI:105120]
1966	2	Rhoc	0.447335	0.673	0.512	9.92e-11	1.53e-06	ras homolog family member C [Source:MGI Symbol;Acc:MGI:106028]
1967	2	Klf3	0.392356	0.663	0.493	1.25e-10	1.92e-06	Kruppel-like factor 3 (basic) [Source:MGI Symbol;Acc:MGI:1342773]
1968	2	Osmr	0.349282	0.393	0.206	1.44e-10	2.22e-06	oncostatin M receptor [Source:MGI Symbol;Acc:MGI:1330819]
1969	2	1810037I17Rik	0.350532	0.673	0.542	1.61e-10	2.47e-06	RIKEN cDNA 1810037I17 gene [Source:MGI Symbol;Acc:MGI:1914954]
1970	2	Cox7a2	0.277131	0.796	0.688	1.99e-10	3.05e-06	cytochrome c oxidase subunit 7A2 [Source:MGI Symbol;Acc:MGI:1316715]
1971	2	Ppp3ca	0.309677	0.643	0.485	2.82e-10	4.33e-06	protein phosphatase 3, catalytic subunit, alpha isoform [Source:MGI Symbol;Acc:MGI:107164]
1972	2	Triobp	0.335495	0.362	0.194	2.86e-10	4.39e-06	TRIO and F-actin binding protein [Source:MGI Symbol;Acc:MGI:1349410]
1973	2	Sh3tc1	0.257988	0.255	0.106	3.53e-10	5.43e-06	SH3 domain and tetratricopeptide repeats 1 [Source:MGI Symbol;Acc:MGI:2678949]
1974	2	Sec62	0.285825	0.781	0.647	3.59e-10	5.52e-06	SEC62 homolog (S. cerevisiae) [Source:MGI Symbol;Acc:MGI:1916526]
1975	2	Pnkd	0.400095	0.423	0.252	4.1e-10	6.3e-06	paroxysmal nonkinesiogenic dyskinesia [Source:MGI Symbol;Acc:MGI:1930773]
1976	2	Egr1	0.331629	0.944	0.791	4.44e-10	6.82e-06	early growth response 1 [Source:MGI Symbol;Acc:MGI:95295]
1977	2	Ywhah	0.304531	0.679	0.52	4.48e-10	6.88e-06	tyrosine 3-monooxygenase/tryptophan 5-monooxygenase activation protein, eta polypeptide [Source:MGI Symbol;Acc:MGI:109194]
1978	2	Tap2	0.338304	0.459	0.28	5.42e-10	8.32e-06	transporter 2, ATP-binding cassette, sub-family B (MDR/TAP) [Source:MGI Symbol;Acc:MGI:98484]
1979	2	Psmd7	0.294396	0.643	0.484	5.67e-10	8.71e-06	proteasome (prosome, macropain) 26S subunit, non-ATPase, 7 [Source:MGI Symbol;Acc:MGI:1351511]
1980	2	Tpm1	0.297398	0.51	0.326	5.85e-10	8.99e-06	tropomyosin 1, alpha [Source:MGI Symbol;Acc:MGI:98809]
1981	2	Slc25a25	0.299941	0.265	0.116	5.98e-10	9.19e-06	solute carrier family 25 (mitochondrial carrier, phosphate carrier), member 25 [Source:MGI Symbol;Acc:MGI:1915913]
1982	2	Elk4	0.312306	0.408	0.241	7.04e-10	1.08e-05	ELK4, member of ETS oncogene family [Source:MGI Symbol;Acc:MGI:102853]
1983	2	Imp3	0.378741	0.541	0.368	8.11e-10	1.25e-05	IMP3, U3 small nucleolar ribonucleoprotein [Source:MGI Symbol;Acc:MGI:1916119]
1984	2	Kif1b	0.375586	0.582	0.414	8.37e-10	1.29e-05	kinesin family member 1B [Source:MGI Symbol;Acc:MGI:108426]
1985	2	Purb	0.329548	0.75	0.624	9.26e-10	1.42e-05	purine rich element binding protein B [Source:MGI Symbol;Acc:MGI:1338779]
1986	2	Cox5a	0.261527	0.816	0.706	9.47e-10	1.46e-05	cytochrome c oxidase subunit 5A [Source:MGI Symbol;Acc:MGI:88474]
1987	2	Tcf3	0.26534	0.337	0.168	1.08e-09	1.66e-05	transcription factor 3 [Source:MGI Symbol;Acc:MGI:98510]
1988	2	Taf13	0.354533	0.352	0.19	1.22e-09	1.87e-05	TATA-box binding protein associated factor 13 [Source:MGI Symbol;Acc:MGI:1913500]
1989	2	Kifc3	0.274979	0.255	0.113	1.26e-09	1.93e-05	kinesin family member C3 [Source:MGI Symbol;Acc:MGI:109202]
1990	2	Cbx1	0.366212	0.505	0.328	1.33e-09	2.04e-05	chromobox 1 [Source:MGI Symbol;Acc:MGI:105369]
1991	2	Pdcl3	0.332152	0.515	0.353	1.39e-09	2.14e-05	phosducin-like 3 [Source:MGI Symbol;Acc:MGI:1916083]
1992	2	2022-03-02	0.357248	0.531	0.367	1.6e-09	2.46e-05	membrane-associated ring finger (C3HC4) 2 [Source:MGI Symbol;Acc:MGI:1925915]
1993	2	Cdipt	0.331363	0.372	0.21	1.69e-09	2.6e-05	CDP-diacylglycerol--inositol 3-phosphatidyltransferase (phosphatidylinositol synthase) [Source:MGI Symbol;Acc:MGI:105491]
1994	2	Git2	0.27856	0.434	0.251	1.88e-09	2.89e-05	GIT ArfGAP 2 [Source:MGI Symbol;Acc:MGI:1347053]
1995	2	Ino80d	0.341779	0.367	0.201	2.01e-09	3.08e-05	INO80 complex subunit D [Source:MGI Symbol;Acc:MGI:3027003]
1996	2	Nck1	0.375536	0.469	0.3	2.17e-09	3.34e-05	non-catalytic region of tyrosine kinase adaptor protein 1 [Source:MGI Symbol;Acc:MGI:109601]
1997	2	Psme1	0.343863	0.694	0.568	2.32e-09	3.56e-05	proteasome (prosome, macropain) activator subunit 1 (PA28 alpha) [Source:MGI Symbol;Acc:MGI:1096367]
1998	2	Ccnd1	0.390696	0.352	0.183	2.35e-09	3.61e-05	cyclin D1 [Source:MGI Symbol;Acc:MGI:88313]
1999	2	Lcorl	0.276396	0.286	0.135	2.56e-09	3.93e-05	ligand dependent nuclear receptor corepressor-like [Source:MGI Symbol;Acc:MGI:2651932]
[truncated: 7,212 more rows]
